# Supplementary material
Source: PubMed Central journal article supplement (PMC5915351)
Supplement: NIHMS959981-supplement-SI_doc.pdf [file NIHMS959981-supplement-SI_doc.pdf]

Supporting Information for:

## **In vitro biosynthetic studies of bottromycin expand the enzymatic capabilities of the YcaO superfamily**

Christopher J. Schwalen<sup>†</sup>, Graham A. Hudson<sup>†</sup>, Simone Kosol<sup>§</sup>, Nilkamal Mahanta<sup>†‡</sup>, Gregory L. Challis<sup>§,#</sup>, Douglas A. Mitchell<sup>†‡\*</sup>

<sup>†</sup>Department of Chemistry, University of Illinois at Urbana-Champaign, 600 South Mathews Avenue, Urbana, Illinois 61801, USA. <sup>§</sup>Department of Chemistry and Warwick Integrative Synthetic Biology Center, University of Warwick, Coventry CV4 7AL, UK. <sup>‡</sup>Carl R. Woese Institute for Genomic Biology, University of Illinois at Urbana-Champaign, 1206 West Gregory Drive, Urbana, Illinois 61801, USA. <sup>#</sup>Department of Biochemistry and Molecular Biology and ARC Centre of Excellence in Advanced Molecular Imaging, Monash University, Clayton, Victoria 3800, Australia

\* Corresponding author:

Douglas A. Mitchell (dougasm@illinois.edu), phone: 1-217-333-1345, fax: 1-217-333-0508

### **Table of Contents**

|                                                                                                    |    |
|----------------------------------------------------------------------------------------------------|----|
| Experimental Methods .....                                                                         | 3  |
| Figure S1: Bottromycin BGCs from sequenced organisms.....                                          | 8  |
| Table S1: Similarity/identity comparison of bottromycin biosynthetic enzymes.....                  | 9  |
| Figure S2: Conservation of ATP-binding motifs in bottromycin cyclodehydratases.....                | 12 |
| Table S2: Oligonucleotide primers used in this study.....                                          | 14 |
| Table S3: Sequences for <i>E. coli</i> expression.....                                             | 18 |
| Figure S3: SDS-PAGE analysis of proteins used in this study.....                                   | 19 |
| Figure S4: Multiple sequence alignment of BmbD and BmbE proteins.....                              | 21 |
| Figure S5: Activity assessment of bottromycin cyclodehydratase C-terminal truncations.....         | 24 |
| Figure S6: Chemical labeling evidence for thiazoline and macrolactamidine formation.....           | 25 |
| Table S4: Precursor peptide sequences and processing by BmbD and BmbE YcaOs.....                   | 26 |
| Figure S7 (i-xvi): Tandem MS fragmentation of bottromycin cyclodehydratase products.....           | 27 |
| Table S5 (i-xv): MS fragment assignments.....                                                      | 43 |
| Figure S8 (i-x): NMR spectroscopic characterization of cyclodehydration products.....              | 58 |
| Table S6: Assignments for signals due to protons in NMR spectra of cyclodehydrated products.....   | 68 |
| Figure S9: In vitro processing is not enhanced by BmbG or BmbH.....                                | 69 |
| Figure S10: Minimal follower peptide for bottromycin cyclodehydratase processing.....              | 70 |
| Figure S11: Follower peptide residues important for thiazoline and macrolactamidine formation..... | 71 |
| Figure S12: Generation of a fluorescently-labeled bottromycin precursor peptide.....               | 73 |

|                                                                                  |    |
|----------------------------------------------------------------------------------|----|
| Figure S13: Fluorescence polarization analysis of BmbC binding.....              | 74 |
| Figure S14: RODEO prospecting of YcaO superfamily classes. ....                  | 76 |
| Table S7: Co-Occurrence of genes with non-canonical YcaOs.....                   | 77 |
| Figure S15: Sequence similarity network (SSN) of non-canonical YcaOs. ....       | 79 |
| Figure S16: SSN of non-canonical YcaOs related to bottromycin BmbD. ....         | 80 |
| Figure S17: SSN of non-canonical YcaOs related to bottromycin BmbE.....          | 81 |
| Figure S18: Phylogenetic tree of YcaO subfamilies with representative BGCs. .... | 82 |
| Supplemental References.....                                                     | 84 |

## Experimental Methods

**General materials and methods.** Reagents used for molecular biology experiments were purchased from New England Biolabs (NEB, Ipswich, MA), Thermo Fisher Scientific (Waltham, MA) or Gold Biotechnology Inc. (St. Louis, MO). Other chemicals were purchased from Sigma-Aldrich (St. Louis, MO). *Escherichia coli* DH5 $\alpha$  and BL21(DE3) strains were used for plasmid maintenance and protein overexpression, respectively. Plasmid inserts were sequenced at ACGT Inc. (Wheeling, IL). MALDI-TOF-MS analysis was performed using a Bruker UltrafleXtreme MALDI-TOF-TOF mass spectrometer (Bruker Daltonics) in reflector positive mode at the University of Illinois School of Chemical Sciences Mass Spectrometry Laboratory. ESI-MS/MS analyses were performed using a SYNAPT ESI quadrupole TOF Mass Spectrometry System (Waters) equipped with an ACQUITY Ultra Performance Liquid Chromatography (UPLC) system (Waters).

**Molecular biology techniques.** Oligonucleotides were purchased from Integrated DNA Technologies Inc. (Coralville, IA). Genes optimized for recombinant expression in *E. coli* were synthesized by GenScript (Piscataway, NJ). Site-directed mutagenesis on BotA was performed using the QuikChange method (Agilent) as per the manufacturer's instructions using Platinum Taq (Thermo Fisher) or PfuTurbo (Agilent) DNA polymerase. The primers for each mutant are listed in Table 1. The mutations were verified by sequencing using the maltose-binding protein (MBP)-forward primer or the T7 reverse primer.

**MBP-tagged enzyme overproduction and purification.** *E. coli* BL21 (DE3) cells were transformed with a pET28 plasmid encoding the MBP-tagged enzyme of interest. Cells were grown for 24 h on LB agar plates containing 50  $\mu$ g/mL kanamycin at 37 °C. Single colonies were picked to inoculate 10 mL of LB containing 50  $\mu$ g/mL kanamycin and 34  $\mu$ g/mL chloramphenicol and grown at 37 °C for 16-18 h. This culture was used to inoculate 1 L of LB containing 50  $\mu$ g/mL kanamycin and 34  $\mu$ g/mL and grown to an optical density OD<sub>600</sub> of 0.6 then placed on ice for 15 min. Protein expression was induced with the addition of 100  $\mu$ M isopropyl  $\beta$ -D-1-thiogalactopyranoside (IPTG), 500  $\mu$ M ZnSO<sub>4</sub> and 2 mM MgSO<sub>4</sub>. Expression proceeded for 16 h at 16 °C. Cells were harvested by centrifugation at 3,000  $\times$  g for 20 min, washed with phosphate-buffered saline (PBS; 137 mM NaCl, 2.7 mM KCl, 10 mM Na<sub>2</sub>HPO<sub>4</sub> and 1.8 mM KH<sub>2</sub>PO<sub>4</sub>) and centrifuged at 4,000  $\times$  g for 20 min. The harvested cells were stored at -80 °C for a maximum of three weeks before use.

Harvested cells were resuspended in lysis buffer [50 mM Tris-HCl pH 7.3, 150 mM NaCl, 2.5% glycerol (v/v)] containing 4 mg/mL lysozyme, 2  $\mu$ M leupeptin, 2  $\mu$ M benzamidine HCl, 2  $\mu$ M E64 and 30 mM phenylmethane sulfonyl fluoride (PMSF). Cells were homogenized by sonication (3  $\times$  40 s with 10 min equilibration periods at 4 °C with rocking). Insoluble cell debris was removed by centrifugation at 20,000  $\times$  g for 60 min at 4 °C. The supernatant was then applied to a pre-equilibrated amylose resin (NEB; 10 mL of resin per L of cells). The column was washed with 30 mL of lysis buffer [with 0.5 mM tris-(2-carboxyethyl)-phosphine (TCEP)] followed by 30 mL of wash buffer (lysis buffer with 400 mM NaCl, 0.5 mM TCEP). The MBP-tagged proteins were eluted using 30 mL elution buffer (lysis buffer with 300 mM NaCl, 10 mM maltose, 0.5 mM TCEP). Elution was concentrated using a 30 kDa MWCO Amicon Ultra centrifugal filter (EMD Millipore). A buffer exchange with 10  $\times$  volume of protein storage buffer (50 mM HEPES pH 7.3, 300 mM NaCl, 2.5% glycerol (v/v), 0.5 mM TCEP) was performed prior to final concentration and storage. Protein concentrations were assayed using both 280 nm absorbance (theoretical extinction coefficients were calculated using the ExpASy ProtParam tool; <http://web.expasy.org/protparam/>) and a Bradford colorimetric assay using bovine serum albumin (BSA) as a standard (Thermo Fisher Scientific). Purity and possible truncation were assessed by Coomassie-stained SDS-PAGE gel (**Figure S4**).

**MBP-tagged precursor peptide overproduction and purification.** Precursor peptide expression was performed as stated in the above section (**MBP-tagged enzyme overproduction and purification**), with the following modifications: cultures were grown to an optical density  $OD_{600}$  of 1.2 then placed on ice for 15 min and induced with the addition of 100  $\mu$ M IPTG and 2 mM  $MgSO_4$ . Expression proceeded for 1 h at 30 °C for LB or 16 h at 16 °C for TB.

Harvested cells were resuspended in lysis buffer [50 mM Tris-HCl pH 7.5, 150 mM NaCl, 2.5% glycerol (v/v)] containing 4 mg/mL lysozyme, 2  $\mu$ M leupeptin, 2  $\mu$ M benzamidine HCl, 2  $\mu$ M E64 and 30 mM phenylmethane sulfonyl fluoride (PMSF). Elution was concentrated using a 30 kDa MWCO Amicon Ultra centrifugal filter (EMD Millipore). A buffer exchange with 10  $\times$  volume of protein storage buffer [50 mM HEPES pH 7.5, 300 mM NaCl, 2.5% glycerol (v/v), 0.5 mM TCEP] was performed prior to final concentration and storage.

**Precursor peptide cleavage and HPLC purification.** MBP-tagged precursor peptides at a concentration of 300  $\mu$ M were cleaved with tobacco etch virus (TEV) protease at a concentration of 55  $\mu$ M for 16 h at 25 °C. MBP and TEV were precipitated by equilibrating the reaction at 85 °C for 10 min and insoluble material was removed by centrifugation at 4,000  $\times$  g for 30 min. The soluble fraction was purified by either high-performance liquid chromatography (HPLC) or medium-pressure liquid chromatography (MPLC).

HPLC method: For LB expressions, soluble fractions were purified by HPLC using a Betasil C18 column (100 Å pore size, 250  $\times$  4.6 mm, 5  $\mu$ M particle size) (Thermo Scientific) with a mobile phase of 10 mM  $NH_4HCO_3$ /MeCN gradient from 15% to 30% aq. MeCN over 30 min, then held at 95% aq. MeCN for 10 minutes at 1 mL  $min^{-1}$ . Elution of the precursor peptide was monitored at 220 and 280 nm. Fractions were analyzed via MALDI-TOF and dried under reduced pressure. Peptides were finally dissolved in a minimal volume of 10 mM  $NH_4HCO_3$ , flash-frozen in liquid  $N_2$  and lyophilized overnight to dryness.

MPLC method: For TB expressions, soluble fractions were dried under reduced pressure onto 5 g of Celite 545 adsorbent. Precursor peptide adsorbed onto Celite was purified by MPLC using a Teledyne Isco Combiflash EZprep equipped with a RediSep Rf C18 cartridge (43 g media, 100 Å pore size, 20–40  $\mu$ m particle size, 400–632 mesh) using a mobile phase of 10 mM aq.  $NH_4HCO_3$ /MeCN at 30 mL  $min^{-1}$  over a gradient from 10–40% MeCN (20 column volumes), then 40–95% MeCN (5 column volumes). Elution of the precursor peptide was monitored at 220 and 280 nm. Fractions were analyzed via MALDI-TOF and dried under reduced pressure. Peptides were finally dissolved in a minimal volume of 10 mM  $NH_4HCO_3$ , flash-frozen in liquid  $N_2$  and lyophilized overnight to dryness.

**In vitro cyclodehydration of bottromycin precursor peptides.** The following reaction conditions were used for cyclodehydration reactions. In synthetase buffer (50 mM Tris-HCl pH 8.5, 125 mM NaCl, 20 mM  $MgCl_2$ , 1 mM TCEP, 5 mM ATP): BotA precursor peptide (50  $\mu$ M), MBP-BmbD (10  $\mu$ M) or MBP-BmbE (10  $\mu$ M) in a final volume of 50  $\mu$ L. The mixture was allowed to react at 25 °C for 5 h, subjected to centrifugation to remove insoluble material (17,000  $\times$  g, 10 min, 25 °C), desalted using C18 ZipTips (EMD Millipore), eluted into 2  $\mu$ L of 75% aq. MeCN saturated with sinapinic acid and spotted on a stainless steel MALDI target. Samples were analyzed by a Bruker UltrafleXtreme MALDI-TOF MS using manufacturer methods for reflective positive mode.

**Chemical labeling of cyclodehydration products.** Cyclodehydration reactions described above were subjected to either N-terminal dimethylation or cysteine thiol alkylation.<sup>1,2</sup> Reactions were performed in synthetase buffer for cysteine alkylation or a 3-(*N*-morpholino)propanesulfonic acid (MOPS) variant for dimethylation (identical to synthetase buffer with 50 mM MOPS pH 7.5 replacing Tris-HCl). For dimethylation, cyclodehydratase reactions were precipitated by adding equal volume of MeCN, removing insoluble proteins by centrifugation at 17,000  $\times$  g for 15 min, then drying the soluble fraction under reduced

pressure. Samples were re-dissolved in 80  $\mu\text{L}$  of water and 30 mM  $\text{BH}_3\text{-C}_5\text{H}_5\text{N}$  (Sigma) and 20 mM aq.  $\text{CH}_2\text{O}$  (VWR) were added. Reactions were briefly sonicated and incubated at 25  $^\circ\text{C}$  for 16 h. Samples were desalted using C18 ZipTips, eluted into 2  $\mu\text{L}$  of 75% aq. MeCN saturated with sinapinic acid and spotted on a stainless steel MALDI target. Samples were analyzed by MALDI-TOF MS.

For cysteine alkylation, cyclodehydratase reactions were precipitated by adding equal volume of MeCN, removing insoluble proteins by centrifugation at  $17,000 \times g$  for 15 min, then drying the soluble fraction under reduced pressure. Samples were re-dissolved in 80  $\mu\text{L}$  of water and 10 mM  $\text{BrCH}_2\text{CH}_2\text{NH}_2$  (Sigma) was added and reacted at 25  $^\circ\text{C}$  for 16 h. Samples were desalted using C18 ZipTips, eluted into 2  $\mu\text{L}$  of 75% aq. MeCN saturated with sinapinic acid and spotted on a stainless steel MALDI target. Samples were analyzed by MALDI-TOF MS.

**Tandem mass spectrometry characterization of cyclodehydrated products.** In vitro cyclodehydrations were conducted as described in the above section (**In vitro cyclodehydration of bottromycin precursor peptides**) on a 100  $\mu\text{L}$  scale. Insoluble material was removed by centrifugation ( $17,000 \times g$ , 10 min, 25  $^\circ\text{C}$ ) and 2  $\mu\text{g}$  of GluC endoproteinase (Worthington Biochemical) or 0.25  $\mu\text{g}$  of AspN and 5 mM  $\text{ZnSO}_4$  was added and allowed to react for 60 min at 25  $^\circ\text{C}$ . Insoluble material was again removed by centrifugation ( $17,000 \times g$ , 10 min, 25  $^\circ\text{C}$ ), and desalted using C18 ZipTips, eluted into 20  $\mu\text{L}$  of 75% aq. MeCN and were analyzed by ESI MS/MS.

**Purification of the macrolactamidine product of the BmbE-catalyzed reaction.** The following reaction conditions were used for cyclodehydration in synthetase buffer (50 mM Tris-HCl pH 8.5, 125 mM NaCl, 20 mM  $\text{MgCl}_2$ , 1 mM TCEP, 5 mM ATP): BmbC precursor peptide (50  $\mu\text{M}$ ), MBP-BmbE (5  $\mu\text{M}$ ) in a final volume of 10 mL. The reaction mixture was allowed to proceed at 25  $^\circ\text{C}$  for 5 h, and 1 volume equivalent of acetonitrile was added to precipitate the enzyme at 25  $^\circ\text{C}$  for 30 min, insoluble material was removed by centrifugation ( $17,000 \times g$ , 15 min, 25  $^\circ\text{C}$ ). The soluble fraction containing processed precursor peptide was dried under reduced pressure.

Dried samples were dissolved in 10% MeOH/10 mM  $\text{NH}_4\text{HCO}_3$  and purified by preparative HPLC with a Perkin Elmer Flexar HPLC equipped with a Betasil C18 (Thermo Scientific) reverse phase column ( $250 \times 10$  mm, 5  $\mu\text{m}$  particle size, 100  $\text{\AA}$  pore size). A mobile phase of 10 mM aq.  $\text{NH}_4\text{HCO}_3/\text{MeOH}$  was utilized at a flow rate of 4 mL  $\text{min}^{-1}$  with a method of: 10% MeOH (isocratic, 5 min), 10%–30% MeOH (gradient, 35 min), 30%–95% MeOH (gradient, 5 min), 95% MeOH (isocratic, 3 min). Elution was monitored at 220 nm and fractions containing cyclodehydrated bottromycin precursor peptide were dried under reduced pressure to yield a white solid.

Dried bottromycin peptide was dissolved in 0.5 mL of 10 mM  $\text{NH}_4\text{HCO}_3$  and cleaved with 100  $\mu\text{g}$  of sequencing-grade trypsin (Promega) for 3 h at 37  $^\circ\text{C}$ , then transferred to 16 h at 25  $^\circ\text{C}$ . Reactions were then stored at -20  $^\circ\text{C}$  until further purification.

Final purification was performed by HPLC with a Perkin Elmer Flexar HPLC equipped with a Betasil C18 (Thermo Scientific) reverse phase column ( $250 \times 4.6$  mm, 5  $\mu\text{m}$  particle size, 100  $\text{\AA}$  pore size). A mobile phase of 10 mM aq.  $\text{NH}_4\text{HCO}_3/\text{MeOH}$  was utilized at a flow rate of 1 mL  $\text{min}^{-1}$ . Bottromycin N15K-macrolactamidine was injected as 1 mL solution with a method of: 40% MeOH (isocratic, 5 min), 40–75% MeCN (gradient, 40 min). Elution was monitored at 220 nm and spotted on 2  $\mu\text{L}$  of 75% aq. MeCN saturated with sinapinic acid and spotted on a stainless steel MALDI target for confirmation by MALDI-TOF MS.

**Purification of the thiazoline product of the BmbD-catalyzed reactions.** The following reaction conditions were used for cyclodehydration in synthetase buffer (50 mM Tris-HCl pH 7.5, 125 mM NaCl,

20 mM MgCl<sub>2</sub>, 1 mM TCEP, 5 mM ATP): BmbC precursor peptide (50 μM), MBP-BmbD (5 μM) in a final volume of 10 mL. The reaction was allowed to proceed at 25 °C for 5 h, and 1 volumetric equivalent of acetonitrile was added to precipitate enzyme at 25 °C for 30 min, then centrifuged to remove insoluble material (17,000 × g, 15 min, 25 °C). The soluble fraction containing processed precursor peptide was dried under reduced pressure.

Dried samples were dissolved in 10% MeOH/10 mM NH<sub>4</sub>HCO<sub>3</sub> and purified by preparative HPLC with a Perkin Elmer Flexar HPLC equipped with a Betasil C18 (Thermo Scientific) reverse phase column (250 × 10 mm, 5 μm particle size, 100 Å pore size). A mobile phase of 10 mM aq. NH<sub>4</sub>HCO<sub>3</sub>/MeOH was utilized at a flow rate of 4 mL min<sup>-1</sup> with a method of: 10% MeOH (isocratic, 5 min), 10%–30% MeOH (gradient, 35 min), 30%–95% MeOH (gradient, 5 min), 95% MeOH (isocratic, 3 min). Elution was monitored at 220 nm and fractions containing cyclodehydrated bottromycin precursor peptide were dried under reduced pressure to yield a white solid.

Dried bottromycin peptide was dissolved in 0.5 mL of 10 mM NH<sub>4</sub>HCO<sub>3</sub> and cleaved with 100 μg of sequencing-grade trypsin (Promega) for 3 h at 37 °C, then transferred to 16 h at 25 °C. Reactions were then stored at -20 °C until further purification.

Final purification was performed by HPLC with a Perkin Elmer Flexar HPLC equipped with a Betasil C18 (Thermo Scientific) reverse phase column (250 × 4.6 mm, 5 μm particle size, 100 Å pore size). A mobile phase of 10 mM aq. NH<sub>4</sub>HCO<sub>3</sub>/MeOH was utilized at a flow rate of 1 mL min<sup>-1</sup>. Bottromycin N15K-thiazoline was injected as 1 mL solution with a method of: 40% MeOH (isocratic, 5 min), 40–75% MeCN (gradient, 40 min). Elution was monitored at 220 nm and spotted on 2 μL of 75% aq. MeCN saturated with sinapinic acid and spotted on a stainless steel MALDI target for confirmation by MALDI-TOF MS.

**Preparation and purification of fluorescein-labeled bottromycin precursor peptide.** The double mutant, C-terminal His-tagged construct (C8S-S43C-His) was generated via site-directed mutagenesis and prepared and purified using above methods. Purified, lyophilized peptide was labeled with 6-(iodoacetamido)fluorescein (IAF, Sigma) by reducing 500 μM of precursor peptide in 10 mM NH<sub>4</sub>HCO<sub>3</sub> buffer with 500 μM TCEP for 30 minutes at 25 °C. 5 molar equivalents of IAF was dissolved in 1 volumetric equivalent of *N,N*-dimethylformamide and added to the reduced peptide for 45 minutes at 25 °C away from light. Reaction was quenched with the addition of 20 mM dithiothreitol (DTT) and further incubation for 60 minutes at 25 °C away from light. The reaction conversion was monitored by desalted using C18 ZipTips, eluted into 2 μL of 75% aq. MeCN saturated with sinapinic acid and spotted on a stainless steel MALDI target and analyzed by MALDI-TOF MS.

Labeled peptide was purified by HPLC with a Perkin Elmer Flexar HPLC equipped with a Betasil C18 (Thermo Scientific) reverse phase column (250 × 4.6 mm, 5 μm particle size, 100 Å pore size). A mobile phase of 10 mM aq. NH<sub>4</sub>HCO<sub>3</sub>/MeOH was utilized at a flow rate of 1 mL min<sup>-1</sup>. Bottromycin N15K-macrolactamidine was injected as 1 mL solution with a method of: 40% MeOH (isocratic, 5 min), 40–95% MeCN (gradient, 20 min). Elution was monitored at 220 nm, 280 nm and 495 nm.

**Mass spectrometric characterization of thiazoline and macrolactamidine intermediates.** Peptides desalted using a ZipTip were eluted into 75% aq. MeCN. Samples were directly infused into a ThermoFisher Scientific Orbitrap Fusion ESI-MS using an Advion TriVersa Nanomate 100. The MS was calibrated and tuned with Pierce LTQ Velos ESI Positive Ion Calibration Solution (ThermoFisher). The MS was operated using the following parameters: resolution, 100,000; isolation width (MS/MS), 2 m/z; normalized collision energy (MS/MS), 35; activation q value (MS/MS), 0.4; activation time (MS/MS), 30 ms. Fragmentation was performing using collision-induced dissociation (CID) at 35%. Data analysis was conducted using the Qualbrowser application of Xcalibur software (Thermo-Fisher Scientific).

**Nuclear magnetic resonance spectroscopic characterization of thiazoline and macrolactamidine intermediates.** The three compounds were dissolved in D<sub>6</sub>M<sub>2</sub>SO. All solution NMR data was recorded at 305 K on a 700 MHz Bruker Avance spectrometer equipped with a cryoprobe. Standard COSY, TOCSY, and NOESY spectra with solvent suppression were acquired for each compound with <sup>1</sup>H spectral widths of 8400 Hz. FIDs for TOCSY and COSY spectra had 2406 and 256 points, and 2048 and 448 points for NOESY spectra. TOCSY spectra were recorded with mixing times between 70 and 100 ms and NOESY spectra with 150-200 ms. All spectra were processed in TopSpin 3.2 and analysed with CCPNMR.<sup>3</sup>

**Fluorescence polarization binding studies of bottromycin follower peptide.** The interactions between the fluorescently labeled precursor peptide and BmbD, BmbE, excised BmbB-RRE (residues 492-593) and excised BmbF-RRE (residues 526-670) were quantified using a fluorescence polarization (FP) assay. To maximize the polarization signal, all proteins remained MBP tagged. In general, protein was serially diluted into binding buffer (50 mM HEPES, pH 7.5, 300 mM NaCl, 2.5% (v/v) glycerol, 0.5 mM TCEP) and mixed with 25 nM of the appropriate fluorescein-labeled BmbC. Binding assays were carried out in nonbinding-surface, 384-black-well polystyrene microplates (Corning) and measured using a Synergy H4 Hybrid plate reader (BioTek) with  $\lambda_{\text{ex}} = 485$  nm and  $\lambda_{\text{em}} = 538$  nm and data were recorded with Gen5 software. Prior to measurement, the dilutions were equilibrated with shaking for 30 min at 25 °C. Dissociation constant (K<sub>d</sub>) values were calculated from the 50% saturation point using a dose-response curve fit in Origin Pro 9.1 (OriginLab) with three independent titrations. Background fluorescence from the proteins alone was subtracted from the fluorescence polarization signal obtained with the fluorophore.

**Figure S1: Bottromycin BGCs from sequenced organisms.** (A) Additional bottromycin BGCs were identified by BLAST-P searches using BmbD and BmbE as the query sequences. Incomplete assembly of sequencing reads from *Streptomyces sulphureus* are indicated by the broken gene diagram. (B) Putative precursor peptides for bottromycin scaffolds aligned by Clustal Omega (“\*” indicates identical residues, “.” indicates more similar residues, “.” indicates less similar residues). Divergent regions to the general bottromycin precursor consensus sequence are highlighted in red.

**A**

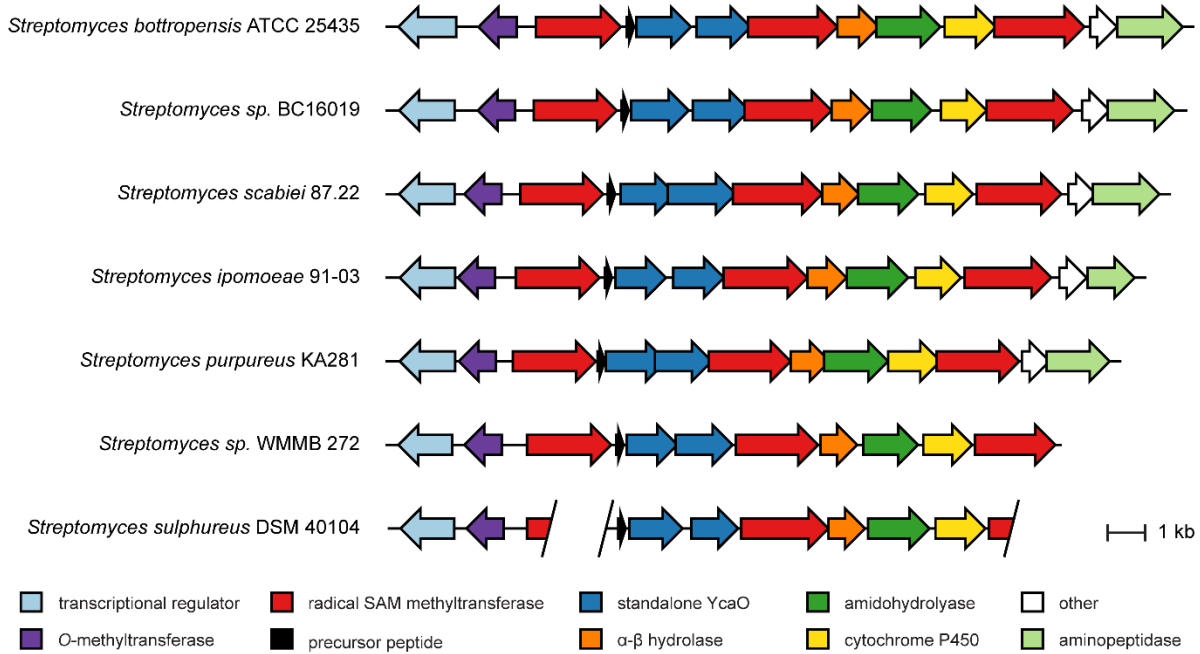

**B**

Streptomyces bottropensis ATCC 25435 MGPVVVFDCMTADFLNDDPNNAELSALEMEELESWGAWDGEATS--

Streptomyces sp. BC16019 MGPVVVFDCMTADFLNDDPNNAELSALEMEELESWGAWDGEATS--

Streptomyces scabiei 87.22 MGPVVVFDCMTADFLNDDPNNAELSALEMEELESWGAWDGEATS--

Streptomyces ipomoeae 91-03 MGPVVVFDCMTADFLNDDPNNAELSALEMEELESWGDWDG**DV**TS--

Streptomyces purpureus KA281 MGPVVVFDCMTADFLNDDPNNAELSALEMEELESWGAW**SEGDSAV**-

Streptomyces sp. WMMB 272 MGP**AVV**FDCMTADFLNDDPNNAEL**S**LEMEELESWGAW**SDDTDQSV**

Streptomyces sulphureus DSM 40104 MGPVVVFDCMTADFLNDDPNNAELSALEMEELESWGAW**SEGDSAV**-

\*\*\* . \*\*\*\*\* : \*\*\*\*\* \*

core peptide follower peptide



**Table S1: Similarity/identity comparison of bottromycin biosynthetic enzymes.** NCBI accession numbers for bottromycin biosynthetic enzymes are shown below. The bottromycin biosynthetic enzymes were analyzed for sequence similarity using MatGAT 2.02 with a PAM250 scoring matrix.<sup>4</sup> Percent similarity values are yellow while percent identity values are blue. *S*-Adenosylmethionine methyltransferases are denoted “SAM MT”. A separate table of gene nomenclature for other characterized bottromycin BGCs is provided at the bottom.

| <b>BmbA</b>       | 1  | 2  | 3  | 4  | 5  | 6  | 7  |
|-------------------|----|----|----|----|----|----|----|
| 1. CCM09441.1     |    | 90 | 91 | 86 | 75 | 67 | 66 |
| 2. AFV25479.1     | 94 |    | 90 | 87 | 77 | 68 | 68 |
| 3. CBG72696.1     | 96 | 94 |    | 87 | 75 | 66 | 66 |
| 4. WP_048819678.1 | 93 | 94 | 93 |    | 78 | 68 | 68 |
| 5. WP_019887073.1 | 86 | 87 | 86 | 87 |    | 68 | 68 |
| 6. AFU90406.1     | 80 | 81 | 80 | 81 | 81 |    | 99 |
| 7. WP_019549436.1 | 80 | 81 | 80 | 80 | 81 | 99 |    |

| <b>BmbB</b>       | 1  | 2  | 3  | 4  | 5  | 6  | 7  |
|-------------------|----|----|----|----|----|----|----|
| 1. CCM09442.1     |    | 91 | 92 | 89 | 80 | 73 | 73 |
| 2. AFV25480.1     | 96 |    | 92 | 91 | 78 | 74 | 74 |
| 3. CBG72695.1     | 97 | 96 |    | 90 | 77 | 75 | 75 |
| 4. WP_048819673.1 | 95 | 96 | 97 |    | 79 | 76 | 75 |
| 5. WP_078513318.1 | 91 | 90 | 90 | 90 |    | 76 | 70 |
| 6. AFU90405.1     | 87 | 89 | 89 | 89 | 89 |    | 69 |
| 7. WP_013003257.1 | 87 | 87 | 89 | 87 | 84 | 85 |    |

| <b>BmbD</b>       | 1  | 2  | 3  | 4  | 5  | 6  | 7  |
|-------------------|----|----|----|----|----|----|----|
| 1. CCM09444.1     |    | 83 | 86 | 80 | 66 | 60 | 60 |
| 2. AFV25482.1     | 89 |    | 79 | 77 | 64 | 57 | 57 |
| 3. CBG72693.1     | 92 | 86 |    | 76 | 64 | 57 | 57 |
| 4. WP_048819674.1 | 87 | 83 | 83 |    | 69 | 62 | 62 |
| 5. WP_019887077.1 | 80 | 77 | 77 | 85 |    | 66 | 65 |
| 6. AFU90403.1     | 79 | 74 | 75 | 79 | 84 |    | 99 |
| 7. WP_019549855.1 | 79 | 74 | 74 | 80 | 84 | 99 |    |

| <b>BmbE</b>       | 1  | 2  | 3  | 4  | 5  | 6  | 7  |
|-------------------|----|----|----|----|----|----|----|
| 1. CCM09445.1     |    | 74 | 91 | 68 | 77 | 70 | 58 |
| 2. AFV25483.1     | 80 |    | 72 | 82 | 67 | 64 | 69 |
| 3. CBG72692.1     | 94 | 79 |    | 66 | 75 | 68 | 56 |
| 4. WP_009298727.1 | 74 | 88 | 72 |    | 64 | 61 | 75 |
| 5. WP_019887079.1 | 87 | 79 | 84 | 73 |    | 75 | 61 |
| 6. AFU90402.1     | 82 | 77 | 81 | 72 | 92 |    | 80 |
| 7. WP_019549857.1 | 66 | 81 | 65 | 87 | 73 | 81 |    |

| <b>BmbF</b>       | 1  | 2  | 3  | 4  | 5  | 6   | 7   |
|-------------------|----|----|----|----|----|-----|-----|
| 1. CCM09446.1     |    | 91 | 93 | 85 | 76 | 73  | 73  |
| 2. AFV25484.1     | 96 |    | 90 | 87 | 78 | 75  | 75  |
| 3. CBG72691.1     | 97 | 94 |    | 84 | 77 | 74  | 74  |
| 4. WP_009298718.1 | 95 | 94 | 93 |    | 78 | 73  | 73  |
| 5. WP_019887080.1 | 86 | 87 | 85 | 86 |    | 79  | 79  |
| 6. AFU90401.1     | 82 | 84 | 82 | 83 | 91 |     | 100 |
| 7. WP_019549858.1 | 82 | 84 | 82 | 83 | 91 | 100 |     |

| <b>BmbG</b>       | 1  | 2  | 3  | 4  | 5  | 6   | 7  |
|-------------------|----|----|----|----|----|-----|----|
| 1. CCM09447.1     |    | 69 | 73 | 60 | 57 | 49  | 49 |
| 2. AFV25485.1     | 77 |    | 78 | 76 | 68 | 60  | 61 |
| 3. CBG72690.1     | 78 | 85 |    | 74 | 67 | 59  | 60 |
| 4. WP_048819675.1 | 74 | 88 | 84 |    | 69 | 58  | 58 |
| 5. WP_028797636.1 | 67 | 80 | 83 | 81 |    | 62  | 62 |
| 6. AFU90400.1     | 66 | 77 | 78 | 78 | 77 |     | 99 |
| 7. WP_019549859.1 | 66 | 77 | 79 | 78 | 77 | 100 |    |

| <b>BmbH</b>       | 1  | 2  | 3  | 4  | 5  | 6  | 7  |
|-------------------|----|----|----|----|----|----|----|
| 1. CCM09448.1     |    | 78 | 80 | 71 | 61 | 64 | 58 |
| 2. AFV25486.1     | 86 |    | 87 | 85 | 70 | 61 | 66 |
| 3. CBG72689.1     | 85 | 95 |    | 81 | 70 | 60 | 65 |
| 4. WP_009298712.1 | 80 | 92 | 92 |    | 69 | 59 | 64 |
| 5. WP_019887083.1 | 76 | 87 | 85 | 86 |    | 62 | 67 |
| 6. AFU90399.1     | 79 | 76 | 74 | 74 | 78 |    | 91 |
| 7. WP_019549860.1 | 73 | 83 | 81 | 81 | 86 | 91 |    |

| <b>BmbI</b>       | 1  | 2  | 3  | 4  | 5  | 6   | 7   |
|-------------------|----|----|----|----|----|-----|-----|
| 1. CCM09449.1     |    | 78 | 87 | 82 | 75 | 70  | 69  |
| 2. AFV25487.1     | 82 |    | 85 | 83 | 74 | 69  | 68  |
| 3. CBG72688.1     | 90 | 89 |    | 88 | 80 | 75  | 74  |
| 4. WP_048819679.1 | 88 | 87 | 95 |    | 81 | 73  | 73  |
| 5. WP_019887084.1 | 83 | 83 | 89 | 90 |    | 75  | 75  |
| 6. AFU90398.1     | 80 | 80 | 87 | 86 | 89 |     | 100 |
| 7. WP_026328876.1 | 80 | 80 | 87 | 86 | 88 | 100 |     |

| <b>BmbJ</b>       | 1  | 2  | 3  | 4  | 5  | 6  |
|-------------------|----|----|----|----|----|----|
| 1. CCM09450.1     |    | 87 | 88 | 84 | 70 | 66 |
| 2. AFV25488.1     | 95 |    | 87 | 88 | 84 | 70 |
| 3. CBG72687.1     | 94 | 92 |    | 73 | 69 | 73 |
| 4. WP_009298729.1 | 91 | 92 | 92 |    | 69 | 73 |
| 5. WP_040875142.1 | 85 | 84 | 88 | 88 |    | 69 |
| 6. AFU90397.1     | 80 | 79 | 82 | 83 | 85 |    |

| <b>BmbR</b>       | 1  | 2  | 3  | 4  | 5  | 6  |
|-------------------|----|----|----|----|----|----|
| 1. CCM09451.1     |    | 94 | 87 | 77 | 78 | 68 |
| 2. AFV25489.1     | 99 |    | 88 | 81 | 79 | 67 |
| 3. CBG72686.1     | 94 | 94 |    | 77 | 73 | 63 |
| 4. WP_009298734.1 | 87 | 87 | 87 |    | 69 | 60 |
| 5. WP_019887087.1 | 90 | 92 | 86 | 80 |    | 72 |
| 6. WP_019549673.1 | 85 | 86 | 82 | 77 | 89 |    |

| <b>BmbK</b>       | 1  | 2  | 3  | 4  | 5  | 6  |
|-------------------|----|----|----|----|----|----|
| 1. CCM09452.1     |    | 82 | 88 | 58 | 68 | 64 |
| 2. AFV25490.1     | 92 |    | 86 | 62 | 68 | 65 |
| 3. CBG72685.1     | 91 | 91 |    | 61 | 69 | 65 |
| 4. WP_048819676.1 | 68 | 70 | 70 |    | 52 | 49 |
| 5. WP_019887089.1 | 82 | 83 | 85 | 66 |    | 69 |
| 6. WP_019549672.1 | 81 | 82 | 84 | 64 | 84 |    |

| <b>Annotated Function</b>                         | <b><i>Streptomyces bottropensis</i> DSM 40262</b> | <b><i>Streptomyces</i> sp. WMMB272</b> | <b><i>Streptomyces scabies</i></b> | <b><i>Streptomyces</i> sp. BC16019</b> |
|---------------------------------------------------|---------------------------------------------------|----------------------------------------|------------------------------------|----------------------------------------|
| Major facilitator                                 | <i>bmbT</i>                                       | <i>bstK</i>                            | <i>btmA</i>                        | <i>botT</i>                            |
| O-methyltransferase                               | <i>bmbA</i>                                       | <i>bstB</i>                            | <i>btmB</i>                        | <i>botO</i>                            |
| Radical SAM MT (Phe6 $\beta$ -methylation)        | <i>bmbB</i>                                       | <i>bstC</i>                            | <i>btmC</i>                        | <i>botRMT1</i>                         |
| Precursor peptide                                 | <i>bmbC</i>                                       | <i>bstA</i>                            | <i>btmD</i>                        | <i>botA</i>                            |
| YcaO (thiazoline)                                 | <i>bmbD</i>                                       | <i>bstD</i>                            | <i>btmE</i>                        | <i>botC</i>                            |
| YcaO (macrolactamidine)                           | <i>bmbE</i>                                       | <i>bstE</i>                            | <i>btmF</i>                        | <i>botCD</i>                           |
| Radical SAM MT (Val4 & Val5 $\beta$ -methylation) | <i>bmbF</i>                                       | <i>bstF</i>                            | <i>btmG</i>                        | <i>botRMT2</i>                         |
| $\alpha/\beta$ hydrolase                          | <i>bmbG</i>                                       | <i>bstG</i>                            | <i>btmH</i>                        | <i>botH</i>                            |
| Metallo-hydrolase                                 | <i>bmbH</i>                                       | <i>bstH</i>                            | <i>btmI</i>                        | <i>botAH</i>                           |
| Cytochrome P450                                   | <i>bmbI</i>                                       | <i>bstI</i>                            | <i>btmJ</i>                        | <i>botCYP</i>                          |
| Radical SAM MT (Pro2 $\beta$ -methylation)        | <i>bmbJ</i>                                       | <i>bstJ</i>                            | <i>btmK</i>                        | <i>botRMT3</i>                         |
| Transcriptional regulator                         | <i>bmbR</i>                                       |                                        | <i>btmL</i>                        | <i>botR</i>                            |
| M17 aminopeptidase                                | <i>bmbK</i>                                       |                                        | <i>btmM</i>                        | <i>botP</i>                            |

**Figure S2: Conservation of ATP-binding motifs in bottromycin cyclodehydratases.** (A) The conserved ATP-binding pockets containing glutamate-rich motifs present in previously characterized YcaO cyclodehydratases. This figure has been reproduced from an earlier publication from our group<sup>5</sup>. (B) On the following page, Ala-substitutions of BmbD and BmbE at the corresponding positions were assayed for activity. As with the canonical ThiF/E1-dependent cyclodehydratases, these variants were inactive.

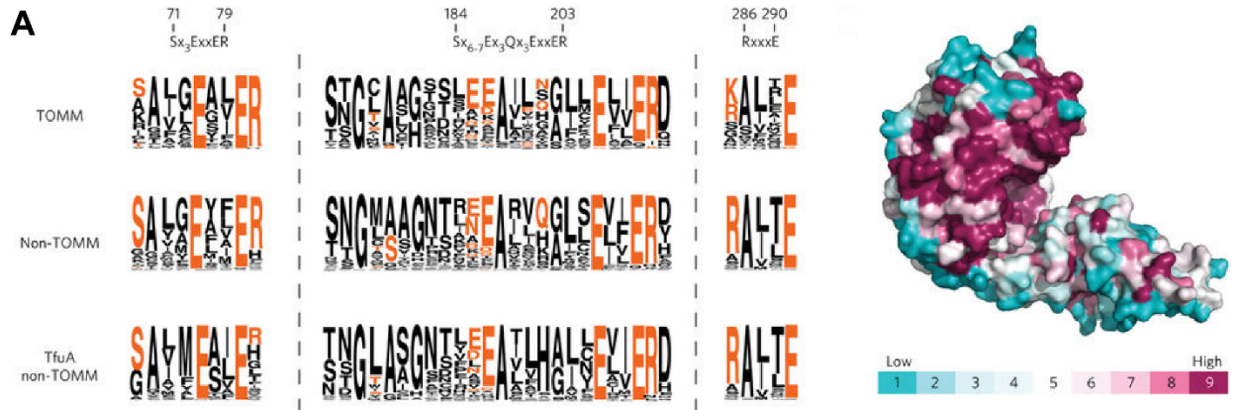

**B**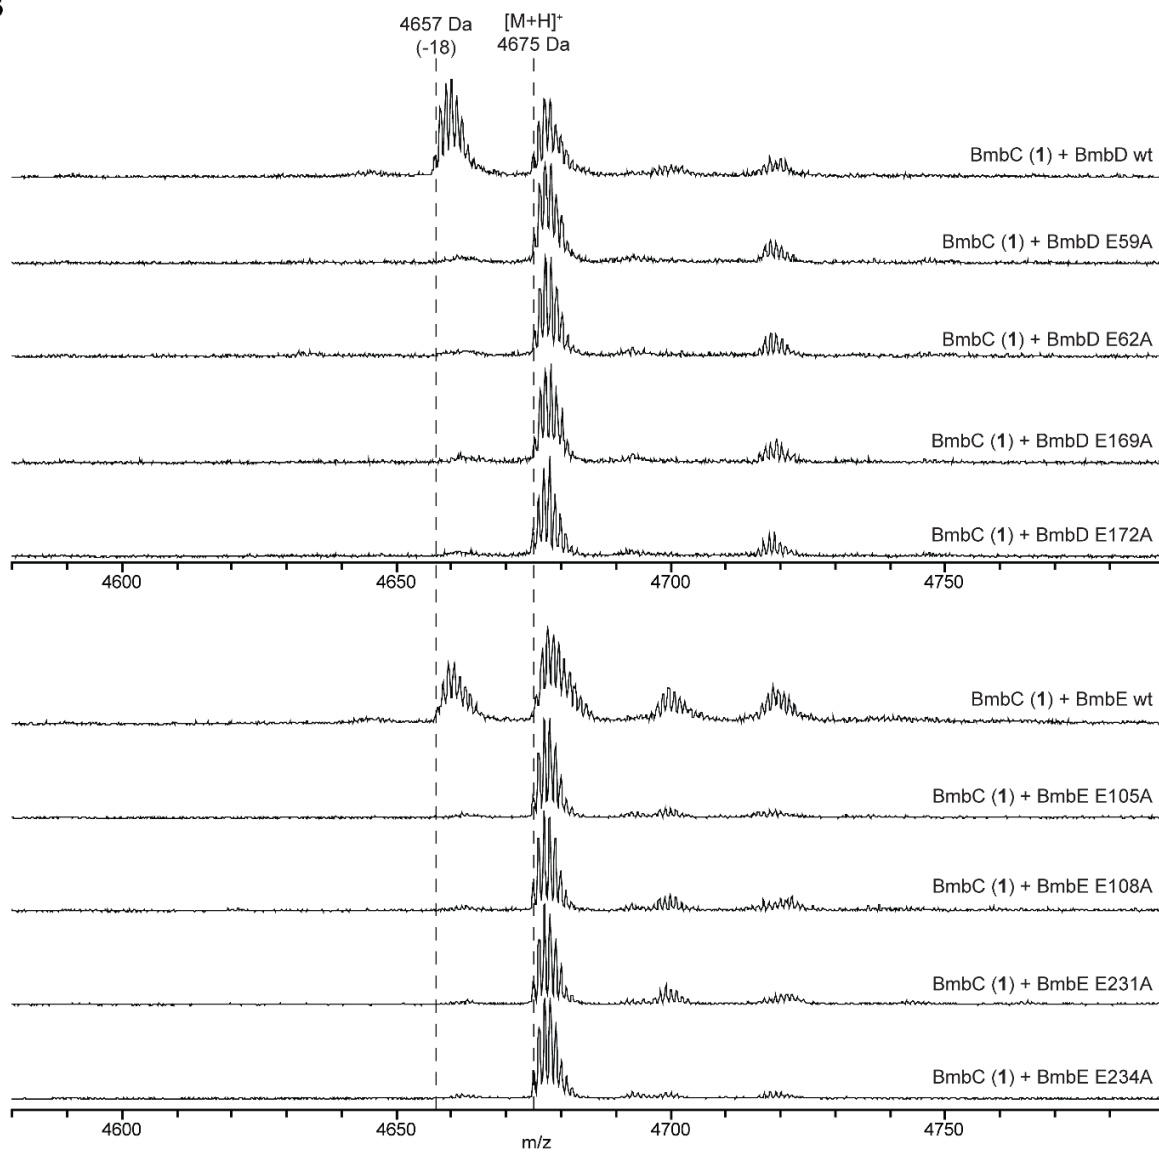

**Table S2: Oligonucleotide primers used in this study.** All sequences provided 5' to 3'. “fwd” indicates a forward primer while “rev” indicates reverse primer. “ins” indicates an insertion sequence at this position and “del” indicates a deletion sequence. Asterisks indicate a stop codon position.

| Primer         | Oligonucleotide Sequence                                |
|----------------|---------------------------------------------------------|
| bmbC V3A fwd   | CCTGTA <del>CTTCCAAGGACCCG</del> CAGTCG                 |
| bmbC V3A rev   | ATGCAGT <del>CGAATACGACTG</del> CGGGTC                  |
| bmbC D7N fwd   | GGACCCG <del>TAGTCGTATTC</del> AACTGCATGAC              |
| bmbC D7N rev   | AGTCCGCGG <del>TCATGCAGTT</del> GAATACG                 |
| bmbC D7A fwd   | GACCCG <del>TAGTCGTATTC</del> GCTGCATG                  |
| bmbC D7A rev   | GTCCGCGG <del>TCATGCAGG</del> CGAATAC                   |
| bmbC D7T fwd   | AAGGACCCG <del>TAGTCGTATTC</del> ACCTGCATG              |
| bmbC D7T rev   | GAAGTCCGCGG <del>TCATGCAGG</del> TGAATAC                |
| bmbC C8P fwd   | GACCCG <del>TAGTCGTATTC</del> GACCCCATGAC               |
| bmbC C8P rev   | GGAAGTCCGCGG <del>TCATGGG</del> GTCG                    |
| bmbC C8A fwd   | GACCCG <del>TAGTCGTATTC</del> GACGCCATGAC               |
| bmbC C8A rev   | GGAAGTCCGCGG <del>TCATGGC</del> GTCG                    |
| bmbC N15K fwd  | CGGACTT <del>CCTCAAGGACGAC</del> CCCAACAACGCGGAGCTGAG   |
| bmbC N15K rev  | TTGGGGT <del>CGTCCTTGAGGA</del> AGTCCGCGGTCATGCAGTCG    |
| bmbC ins2G fwd | ACTTCCAAGGAGG <del>CCCCGTAGTCGTATTC</del> GACTGCATGACC  |
| bmbC ins2G rev | ACGACTACGGGG <del>CCTCCTTGGAAGTACAGG</del> TTCTCAGATCC  |
| bmbC ins2A fwd | ACTTCCAAGGAGG <del>CGCCCGTAGTCGTATTC</del> GACTGCATGACC |
| bmbC ins2A rev | ACGACTACGGGG <del>CGTCCTTGGAAGTACAGG</del> TTCTCAGATCC  |
| bmbC ins2P fwd | ACTTCCAAGGAGG <del>CCCCGTAGTCGTATTC</del> GACTGCATGACC  |
| bmbC ins2P rev | ACGACTACGGGG <del>CGTCCTTGGAAGTACAGG</del> TTCTCAGATCC  |
| bmbC delV3 fwd | TCCAAGGACCCG <del>TATTCGACTGCATGAC</del> CGGGAC         |
| bmbC delV3 rev | TCGAATACGACGGG <del>TCTTGGAAGTACAGG</del> TTCTCAGA      |
| bmbC delG1 fwd | TGTA <del>CTTCCAACCCGTAGTCGTATTC</del> GACTGCATGACCCGG  |
| bmbC delG1 rev | ACGACTACGGG <del>TGGAAGTACAGGTTCTCAGAT</del> CCACGCGG   |
| bmbC delP2 fwd | ACTTCCAAGGAG <del>TAGTCGTATTCGACTGCATGAC</del> CGCG     |
| bmbC delP2 rev | AATACGACTACT <del>CCTTGGAAGTACAGGTTCTCAGAT</del> CC     |
| bmbC P2G fwd   | ACTTCCAAGGAGG <del>CGTAGTCGTATTCGACTGCATGAC</del> CGCG  |
| bmbC P2G rev   | AATACGACTACG <del>CCTCCTTGGAAGTACAGGTTCTCAGAT</del> CC  |
| bmbC F6A fwd   | CCGTAGTCGTAG <del>CGGACTGCATGACCCG</del> GACTTCTCAAC    |
| bmbC F6A rev   | GTCATGCAGTCCG <del>TACGACTACGGGTCCTTGGAAGTACAG</del>    |
| bmbC ins9C fwd | TATTCGACTGCTGCATGAC <del>CGCGGACTTCTCAACGACGAC</del>    |
| bmbC ins9C rev | TCCGCGGTCATGCAGCAGT <del>CGAATACGACTACGGGTCCTTG</del>   |
| bmbC ins9T fwd | TATTCGACTGCACCATGAC <del>CGCGGACTTCTCAACGACGAC</del>    |
| bmbC ins9T rev | TCCGCGGTCATGGTGCAGT <del>CGAATACGACTACGGGTCCTTG</del>   |
| bmbC ins9S fwd | TATTCGACTGCAGCATGAC <del>CGCGGACTTCTCAACGACGAC</del>    |
| bmbC ins9S rev | TCCGCGGTCATGCTGCAGT <del>CGAATACGACTACGGGTCCTTG</del>   |
| bmbC ins5V fwd | GACCCG <del>TAGTCGTGGTATTCGACTGCATGAC</del> CGGGACTTC   |

|                   |                                            |
|-------------------|--------------------------------------------|
| bmbC ins5V rev    | CAGTCGAATACCACGACTACGGGTCTTGGAGTACAGGTTTC  |
| bmbC V4A fwd      | AACCTGTACTTCCAAGGACCCGTAGCCGTATTTC         |
| bmbC V4A rev      | CGGTCATGCAGTCAATACGGCTACGGG                |
| bmbC V4G fwd      | CTGTACTTCCAAGGACCCGTAGGCGTATTTC            |
| bmbC V4G rev      | CGGTCATGCAGTCAATACGGCTACGGG                |
| bmbC V4I fwd      | GAACCTGTACTTCCAAGGACCCGTAATCGTATTTC        |
| bmbC V4I rev      | CGCGGTATGCAGTCAATACGATTACGGG               |
| bmbC V5A fwd      | GTACTTCCAAGGACCCGTAGTCGCATTTCGAC           |
| bmbC V5A rev      | CCGCGGTATGCAGTCAATGCGACTAC                 |
| bmbC V5G fwd      | CTGTACTTCCAAGGACCCGTAGTCGGATTTCGAC         |
| bmbC V5G rev      | TCCGCGGTATGCAGTCAATCCGACTAC                |
| bmbC V5L fwd      | CCTGTACTTCCAAGGACCCGTAGTCCTATTTCGAC        |
| bmbC V5L rev      | GTCCGCGGTATGCAGTCAATAGGACTAC               |
| bmbC W34* fwd     | GATGGAGGAGCTGGAGTCTTGGTGAGCCTGG            |
| bmbC W34* rev     | AGGTGGCTTACCCTCCCAGGCTACCAGGAC             |
| bmbC S33* fwd     | GGAGATGGAGGAGCTGGAGTCTTGGAGCGCC            |
| bmbC S33* rev     | TGGCTTACCCTCCCAGGCGCTCAGGACTC              |
| bmbC E32* fwd     | GCTGGAGATGGAGGAGCTGGAGTATGGGGC             |
| bmbC E32* rev     | CTTACCCTCCCAGGCGCCCCATCACTCCAG             |
| bmbC L31* fwd     | CGCGTGGAGATGGAGGAGCTGTAGTCTTGG             |
| bmbC L31* rev     | CACCGTCCCAGGCGCCCCAGGACTACAGCTC            |
| bmbC S43C fwd     | CGCCTGGGACGGTGAAGCCACCTGTTGAGCG            |
| bmbC S43C rev     | GGTGCTCGAGTGCGCCGCTCAACAGGTGGC             |
| bmbC G35* fwd     | AGTCTGGGGCTGAGCCTGGGACGGTGAAGCCACCTCATG    |
| bmbC G35* rev     | CCGTCCCAGGCTCAGCCCCAGGACTCCAGCTCCTCCATCTC  |
| bmbC E30* fwd     | AGATGGAGGAGTGAAGTGGAGTCTTGGGCGCCTGGGACGG   |
| bmbC E30* rev     | CAGGACTCCAGTCACTCTCCATCTCCAGCGGCTCAGCTC    |
| bmbC A25* fwd     | AGCTGAGCGCGTGAAGTGGAGATGGAGGAGTGGAGTCTTGG  |
| bmbC A25* rev     | TCCATCTCCAGTCAAGCGCTCAGCTCCGCGTTGTTGGGGTC  |
| bmbC N20* fwd     | ACCCCAACAAGTGAAGCGGAGCTGAGCGCGTGGAGATGGAG  |
| bmbC N20* rev     | CTCAGCTCCGCTCAGTTGTTGGGGTCTGCGTTGAGGAAGTC  |
| bmbC N15* fwd     | ACTTCTCAACTGAGACGACCCCAACAACGCGGAGCTGAGC   |
| bmbC N15* rev     | TTGGGGTCTGCTCAGTTGAGGAAGTCCGCGGTATGCAGTC   |
| bmbC S43C His fwd | GTGAAGCCACCTGTGCGGCCGACTCGAGCACCACCACCAC   |
| bmbC S43C His rev | AGTGCGGCCGCACAGGTGGCTTACCCTCCCAGGCGCCCCAG  |
| bmbC F13A fwd     | TGACCGCGGACGCCCTCAACGACGACCCCAACAACGCGGGAG |
| bmbC F13A rev     | TCGTCGTTGAGGGCGTCCGCGGTATGCAGTCAATACGAC    |
| bmbC L14A fwd     | CCGCGGACTTCGCCAACGACGACCCCAACAACGCGGAGCTG  |
| bmbC L14A rev     | GGGTCTGCTTGGCGAAGTCCGCGGTATGCAGTCAATAC     |
| bmbC N15A fwd     | CGGACTTCTCGCCGACGACCCCAACAACGCGGAGCTGAGC   |
| bmbC N15A rev     | TTGGGGTCTGTCGGCGAGGAAGTCCGCGGTATGCAGTCGAA  |

|                |                                            |
|----------------|--------------------------------------------|
| bmbC D16A fwd  | ACTTCCTCAACGCCGACCCCAACACGCGGAGCTGAGCGCG   |
| bmbC D16A rev  | TTGTTGGGGTCGCGCTTGAGGAAGTCCGCGGTCATGCAGTC  |
| bmbC D17A fwd  | TCCTCAACGACGCCCCCAACACGCGGAGCTGAGCGCGCT    |
| bmbC D17A rev  | GCGTTGTTGGGGCGCTCGTTGAGGAAGTCCGCGGTCATGC   |
| bmbC E22A fwd  | CCAACAACGCGCGCTGAGCGCGCTGGAGATGGAGGAGCTG   |
| bmbC E22A rev  | AGCGCGCTCAGCGCCGCTGTTGTTGGGGTCGTCGTTGAGGAA |
| bmbC L23A fwd  | ACAACGCGGAGGCGAGCGCGCTGGAGATGGAGGAGCTGGAG  |
| bmbC L23A rev  | TCCAGCGCGCTCGCTCCGCGTTGTTGGGGTCGTCGTTGAG   |
| bmbC S24A fwd  | ACGCGGAGCTGGCCGCGCTGGAGATGGAGGAGCTGGAGTCC  |
| bmbC S24A rev  | ATCTCCAGCGCGCCAGCTCCGCGTTGTTGGGGTCGTCGTT   |
| bmbC L26A fwd  | AGCTGAGCGCGCGGAGATGGAGGAGCTGGAGTCTGGGGC    |
| bmbC L26A rev  | TCCTCCATCTCCGCCGCGCTCAGCTCCGCGTTGTTGGGGTC  |
| bmbC E27A fwd  | TGAGCGCGCTGGCGATGGAGGAGCTGGAGTCTGGGGCGCC   |
| bmbC E27A rev  | AGCTCCTCCATCGCCAGCGCGCTCAGCTCCGCGTTGTTGGG  |
| bmbC M28A fwd  | GCGCGCTGGAGGCGGAGGAGCTGGAGTCTGGGGCGCCTGG   |
| bmbC M28A rev  | TCCAGCTCCTCCGCTCCAGCGCGCTCAGCTCCGCGTTGTT   |
| bmbC E29A fwd  | CGCTGGAGATGGCGGAGCTGGAGTCTGGGGCGCCTGGGAC   |
| bmbC E29A rev  | GACTCCAGCTCCGCCATCTCCAGCGCGCTCAGCTCCGCGTT  |
| bmbC E30A fwd  | TGGAGATGGAGGCGCTGGAGTCTGGGGCGCCTGGGACGGT   |
| bmbC E30A rev  | CAGGACTCCAGCGCCTCCATCTCCAGCGCGCTCAGCTCCGC  |
| bmbC L31A fwd  | AGATGGAGGAGGCGGAGTCTGGGGCGCCTGGGACGGTGA    |
| bmbC L31A rev  | CCCCAGGACTCCGCTCCTCCATCTCCAGCGCGCTCAGCTC   |
| bmbC E32A fwd  | TGGAGGAGCTGGCGTCTGGGGCGCCTGGGACGGTGAAGCC   |
| bmbC E32A rev  | GCGCCCCAGGACGCCAGCTCCTCCATCTCCAGCGCGCTCAG  |
| bmbD E59A fwd  | AAGCCCTGTCCGACGCCGTGGAGCGGCTGGTGGCGTGCACC  |
| bmbD E59A rev  | CGCTCCACGGCTGCGGACAGGGCTTTCGCCGTGCCACGGC   |
| bmbD E62A fwd  | CCGAAGCCGTGGCGCGGCTGGTGGCGTGCACCCCTTCGCG   |
| bmbD E62A rev  | GCCACCAGCGCGCCACGGCTTCGGACAGGGCTTTCGCCCG   |
| bmbD E169A fwd | GCGCGCTGCTGGCACTGACCGAAGTATCGACTACGGAGTC   |
| bmbD E169A rev | AGTTCCGTCAGTGCAGCAGCGCGCCGCGCAGCGTCCCTC    |
| bmbD E172A fwd | TGGAAGTACCGCACTGATCGACTACGGAGTCTTCCTGCAC   |
| bmbD E172A rev | TAGTCGATCAGTGCGGTCACTTCAGCAGCGCGCCGCGCA    |
| bmbE E105A fwd | CTGCGCTGTTTGCAAGCGCGGAACATTATCACCTGGACTGG  |
| bmbE E105A rev | TGTTCCGCGCTTGCAAACAGCGCAGAAGCCATGCTACGATG  |
| bmbE E108A fwd | TTGAAAGCGCGGCACATTATCACCTGGACTGGCGTCGCG    |
| bmbE E108A rev | GGTGATAATGTGCCGCGCTTTCAAAACAGCGCAGAAGCCATG |
| bmbE E231A fwd | ACGCAGTGAATGCACTGATTGAACGCGATGCGTGGTCATATC |
| bmbE E231A rev | CGTTCAATCAGTGCATTCAGTTCGCTGGACCAGGGCTTCATG |
| bmbE E234A fwd | ATGAACTGATTGCACGCGATGCGTGGTCATATCAACTGGCC  |
| bmbE E234A rev | CACGCATCGCGTGAATCAGTTCATTCACTGCGTGGACCAG   |
| bmbD R391* fwd | GCGGTGGCCATTGAGATCGTAGCGCAGACCGTGGTCCGGCA  |



|                |                                              |
|----------------|----------------------------------------------|
| bmbD R391* rev | GCGCTACGATCTCAATGGCCACCGCGGTACCCGGACGATC     |
| bmbD D396* fwd | ATCGTAGCGCATAGCGTGGTCCGGCACGTCGCGGTACGAAG    |
| bmbD D396* rev | GCCGGACCACGCTATGCGCTACGATCACGATGGCCACCGCG    |
| bmbD R401* fwd | GTGGTCCGGCATGACGCGGTACGAAGGCCGTGCTCTCGCG     |
| bmbD R401* rev | TCGTGACCGCGTCATGCCGGACCACGGTCTGCGCTACGATC    |
| bmbD G406* fwd | GCGGTACGAATGACGTGCTCTGCGTAACTCGAGCACCAC      |
| bmbD G406* rev | GCAGAGCGACGTCATTGCGTACCGCGACGTGCCGGACCACG    |
| bmbE D434* fwd | TGGAAATGTTTTAGAAAAGCCCGCGCAGGTATCCGGTGCTG    |
| bmbE D434* rev | GCGCGGGCTTTCTAAAACATTTCCAGGCCCGGTGCAACCAC    |
| bmbE G439* fwd | AAGCCCGCGCATGATATCCGGTGCTGCCGACCGCCGTCTG     |
| bmbE G439* rev | AGCACCGGATATCATGCGCGGGCTTTATCAAACATTTCCAG    |
| bmbE P444* fwd | ATCCGGTGCTGTAGACCGGCCGTCTGGGTGAACGTCTGCGTC   |
| bmbE P444* rev | AGACGGCCGGTCTACAGCACCGGATAACCTGCGCGGGCTTTATC |
| bmbE G449* fwd | CCGCGCTCTGTGAGAACGTCTGCGTCCGCGTGGTGATGGC     |
| bmbE G449* rev | CGCAGACGTTCTCACAGACGGCCGGTCGGCAGCACCGGATAAC  |
| bmbE P454* fwd | AACGTCTGCGTTAGCGTGGTGATGGCGGTGGCGCACGTGCG    |
| bmbE P454* rev | CCATCACCACGCTAACGCAGACGTTACCCAGACGGCCGGTC    |
| bmbE G459* fwd | GTGGTGATGGCTGAGGCGCACGTGCTAACTCGAGCACCAC     |
| bmbE_G459* rev | CGAGTGCGCCTCAGCCATCACCACGGGACGCAGACGTTC      |
| bmbB RRE fwd   | AAAGGATCCGCGAACGGTCCGGTGCG                   |
| bmbB RRE rev   | AAAGCGGCCGCTTTGGTACCCTCAATGTAAACCCAA         |
| bmbF RRE fwd   | AAAGGATCCCTGCACGAGCAGAGCC                    |
| bmbF RRE rev   | AAAGCGGCCGCACGACGGCTTCCAG                    |

**Table S3: Sequences for *E. coli* expression.** All sequences are provided 5' to 3'. Gene constructs for BmbD and BmbE were codon optimized and synthesized by GenScript (Piscataway, NJ, USA). The amino acid sequences for the two excised RRE domains of BmbB and BmbF are also given (these were not codon optimized). All proteins were expressed as MBP fusions (see methods for details).

### **BmbD**

```
ATGCGTGAAGCCACCGCTACCGAATGCGAACTGCGTGAAGTCGTCCACCGCTCATAACCGAGTGAACGTACCGTTACCGTCCGCTG
CACCGTTCGTCCGGCAGAAGGTTACAGCGCAGGCCGATGGTTATGGCACGGCCACCACGGAAGCAGTGGCTCGTGGCAAAGCCCTGT
CGGAAGCAGTGGAAACGCTGGTTGCTTGCACCCCGTTTGAACGGTTGCACGTCCGCCGACCGCATGTGCTGATCCGGGTACGGGC
AGCGGTCCGGTGCCGCCGTTCCCGGCAGCCGGCGTTTCGCACCCGCCCGGAAGGTTGCGCAGGTGCTGTCTATCGTCCGCTGACGGG
CGGTGGCCCGCGTCCGCTGCCGCTGTAAGTGGAGCTCTCCGTGGACCCGAGGTGCAGAACTGCGTGCAGGTACCCGACGGCAGCTG
AAGCACGTCTGAGTTCCACCGTCCGTTGGGCAGTGGCTCCGACGCCGGAAGGTGCACTGCGTGGTGCAGTGTGGAAGTACCGGAA
CTGATGACTATGGCGTGTTCCTGCATCGTCCGCTGGCAGTCCGGCTCGTCCGCCGTCAGCAGGTGATCGTACCCCTGGTGGTTCC
GCTGGGTGGCATCGGTGCTACGCGCAGTTCCTGGCGGTCCGCTACGGTTCGTTGGTTCGCTGATGCCGGCAACCGGTTGGGTTGCG
GTGCAACCCGTTGGCGAAGCAACGGATCGCGCTCTGCTGGAAGTGGCACAGGCTGAAACCATGTGGCGTTCCAACCCGACGGCAGAA
CCGGCAGAACGCTTTTTCCTGCGTCCGCTTTGAACGTTGGCCGCTGCTGGCACGTTGCGCTACCCGATTTTCGATCTGCCGACCC
GCGTGTACCGCCGGCAGTAGTGGTCCGGCGGGTGGCCCGGTCCGTACGATGACGGTCCGTGTCCGGCATCCCGCTGGAAGAAC
TGGAAACCGGTGGCATTTCGTGTTTGGGCGGATTCAGGTGCCGTCGACATTTCCGGTCCGGATATCCCGCTACCCGCTGTGTTTT
GCGCACGTGCTGAGCGATCCGCAACCGCTGCTGGGTCTGGTTCGTGCAGGCATCCCGTCTTCGACACCGGTGAAGTGCCTGCAC
GCTGGACCCGAGCCGTCGTCCGGCAGATCGTCCGGTGCACCGGTTGGCCATCGTATCGTAGCGCAGACCGTGGTCCGGCAGCTC
GCGGTACGAAGCCGCTCGCTCTGCGTAA
```

### **BmbE**

```
ATGACCCGCCCGGACAGCCGCAAAACCGCCCCGAAACCGAAGCCGCCACCGAAACGGACCCGCTGACCGCTGTGCTGCTGGATGG
TGCGACCAAAGAAGACGTGCCGCCGGAACCGCAACCGGATATTCGTCAGGCAAGCGTTGGTACTGGTGGCAGCAGAAAG
GTCTGACCGCGGATATTCGCAAAATATGGCATCGAAAGTCCCCGACGTACGAAGTGCCTGTGTCAGAAGCTTCGGGTGCGCTGTGC
TCCCGCAGCTCTGGTAAAGCCCTGGGTCATCGTAGCATGGCTTCTGCGCTGTTTGAAGCGCGGAACATTATCACCTGGACTGGCG
TCGCGATCCCGCGCCCTCTGAAGCAGAATTCGCCCCGGGCCGTGAAATTGCAGAACAGGCAACCGCACGTGCGCAGCGCACTGCTGG
GCCGTCGGGTCAAATCATGCCGGATGCACCCGGTCTGACCCGTCAGTATCGTCCGGTTGAAGAAGCTCTGACCCGTCGTGCAGGT
GACGGTGAAGCAGATGGTCCGCATCGTACCCGGTTTTTCTGCGCGATGGCGGTTACCGTAACGGCCGCATCCGGATGACGATCG
CTCTTTCAGCCGCTGTGGCACTATAACAGTTCGCGAGGCTACGCAAGTGGTGTACGCGTCATGAAGCCCTGGTCCACGCAGTGA
ATGAACTGATTGAACCGGATGCGTGGTCAATCAACTGGCCGTTTCGTAATTTGGCCTGCCGGGTGAAGTCCGGCAACTGCGTGTG
GTTGAACATGGTACCCTGCCGGCAGAACTGCGCGAACTGACCCGTCAGGTTGAAGAAGTCCGTGGCGCGCCGGTGTGATTGTTGA
CATCACCTGCGATACGGGTGTTCCGGCATATGTCTGTGTGACGCTCGTAGCCGGAAGATGTCCGTCGTGATCGGCGAGTGGTGCAT
CCCCGGTCCGTACCTATGCTGTGCAGCGTGCCTGCTGGAATACCTGCAAGTCCGTACGATGTTGAAAACGGTCCGGTGGACGCA
GATACCGAAGCAGGCCAGATTGGTACGGCTCTGGCACGTTACCCGCTCATCTGGCAGCAGCACGCTTTGATATCCATCGTCTGCC
GCACGAATCAACCGCTTTTGAAGCGGACGATGGTCTGCCGGTGCACCGGTTCCGGAACGTCGTGCGTACCTGGTGGATCGTC
TGCGCAATCGGGCGTTGAAGCACATCACCGTGTCTGACCCCGCCGGTCCGGTTACGGTGTGCGACGTGGTGCACCGGGCCCTG
GAAATGTTTGATAAAGCCCGCGCAGGTTATCCGGTGTGCGGACCGCCGCTCTGGGTGAACGTCGTGCGTCCCGTGGTGGTGGCGG
TGGCGCAGCTCGCTAA
```

### **BmbB (residues 492-593, excised RRE domain)**

```
ANGPVRRLAARVRLWRAHESARFGYRLGFDSLTLTDERPGLPPRTTTLRGEEARLFRAVIGGTRFRDLQGQEWQGERWDQALDT
LHAWRRKRWVYIEGTK
```

### **BmbF (residues 526-670, excised RRE domain)**

```
LHEQSRFSFRFGPNMTVLHDGRPHVGTGRHVLRRGGDDQLFRCLVHGGRLHQAVGRVAAMTGRPEDEVHATVREWAGRGWIHLEGRR
GLVLAVRDGMRDELGRAAELREAADGPERAAAGPERAVEPPQAVESERAGGSGRVGAGR
```

**Figure S3: SDS-PAGE analysis of proteins used in this study.** All protein were expressed as N-terminal maltose-binding protein (MBP) fusions. Minor impurities found at ~45 kDa are cleaved MBP. Bmb sequences from *S. bottropensis*, Scb sequences from *S. scabiei*, insertion, deletion and truncation variants are denoted by “^”, “Δ” and “\*”, respectively.

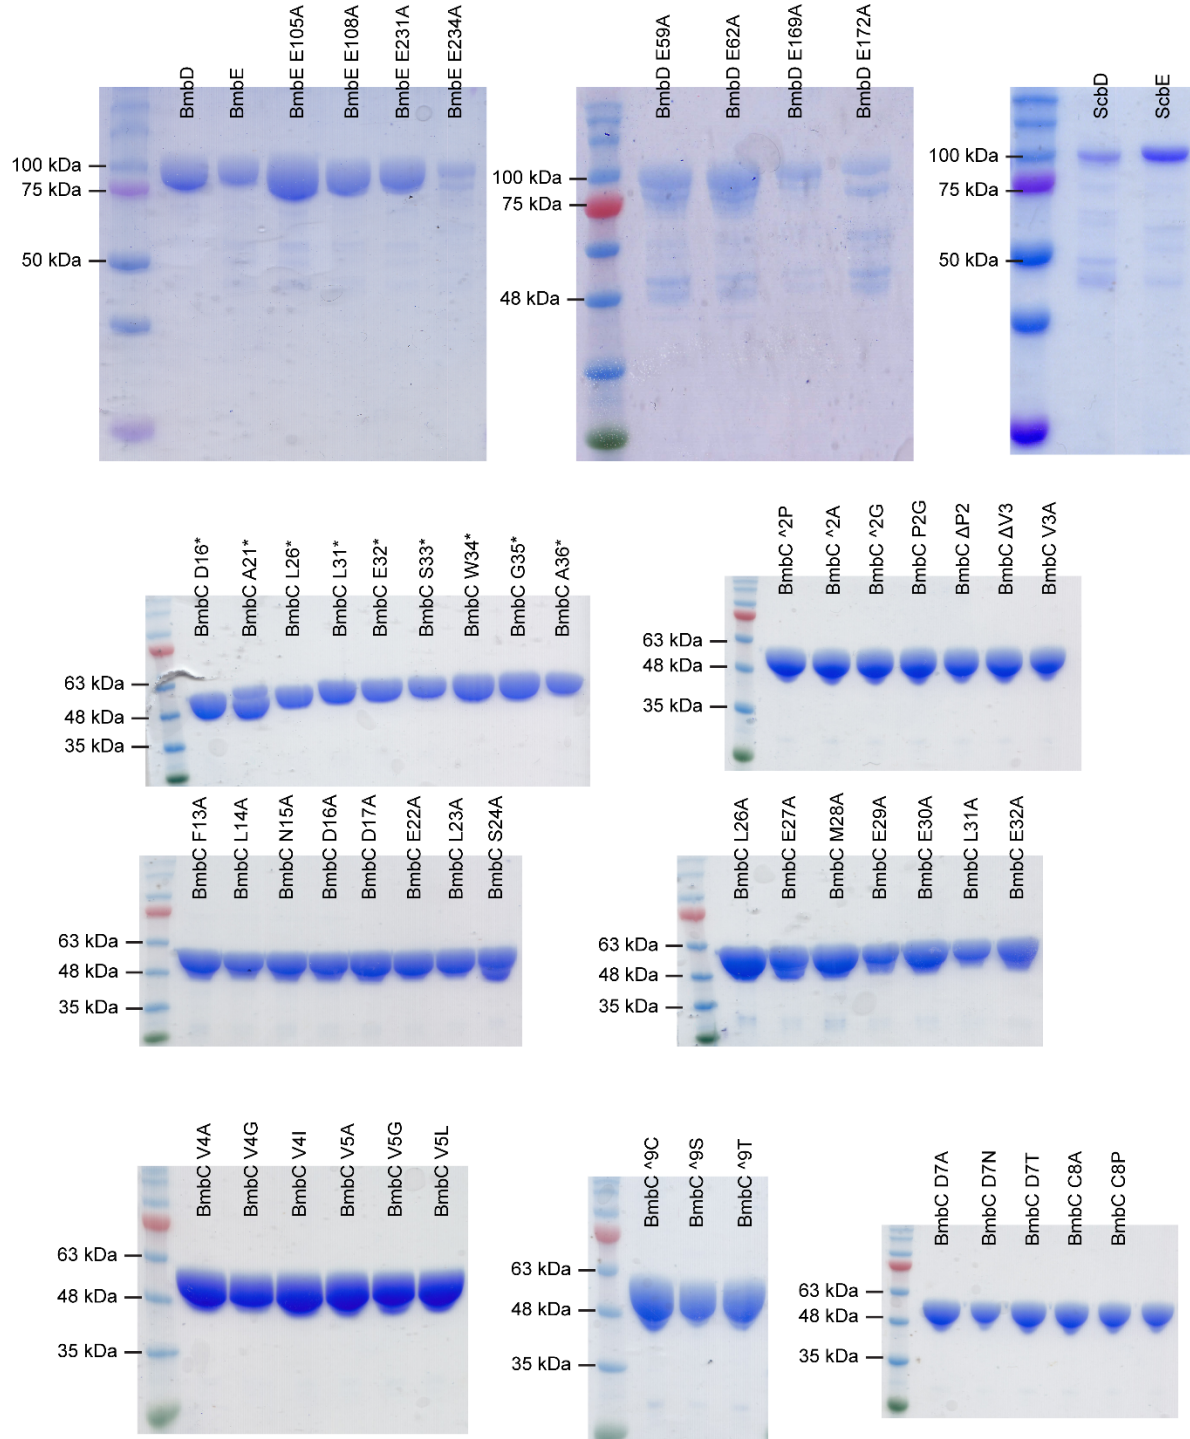

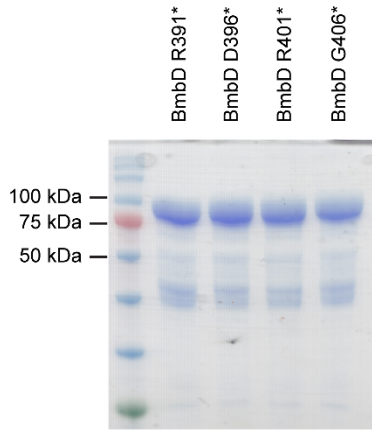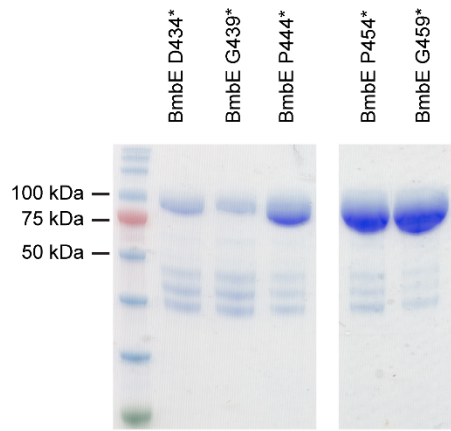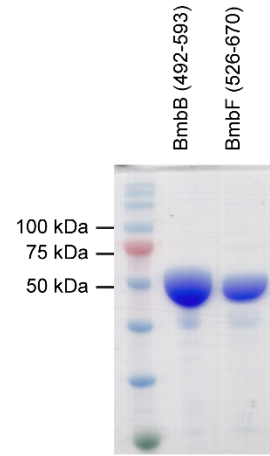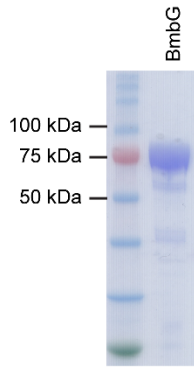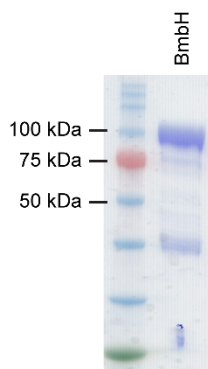

**Figure S4: Multiple sequence alignment of BmbD and BmbE proteins.** Multiple sequence alignment performed by Clustal Omega of BmbD and BmbE proteins from bottromycin BGCs. ATP-binding pocket residues (ExxE) are highlighted in red while the C-terminal truncations are highlighted in blue.

**BmbD homologs:**

```

AFU90403.1      -----MADSSATDCVLREVAFRSYRAEHTVTVQCTVVRPDSGPGQAEGYGTATT
WP_019549855.1 -----MADSSATDCVLREVAFRSYRAEHTVTVQCTVVRPDSGPGQAEGYGTATT
WP_019887077.1 -----MLEASVADCALRDVVHRSYRSRDTVTVRCTVHPASGSPADGYGTATT
EKX68557.1      MKSARRTTGRGSMLEATATECALREVYRSYPSERTVTVRCTVVRPAEGSARADGYGTAAT
AFV25482.1      -----MLEATATECELEVVHRSYPSDRVTVVRCTVVRPAEGTAQADGYGTATT
CCM09444.1      -----MREATATECELEVVHRSYPSERTVTVRCTVVRPAEGSAQADGYGTATT
CBG72693.1      -----MREATATECELEVVHRSYPSSEGTVTVRCTVVRPAEGDARADGYGTATT
*  :::::*  **:*..***  ::  *****:**:*  .*  *:*:**:**

```

```

AFU90403.1      EAVARKKALSEAVERL LACTPFALIARRPTPRDTRSRGTDDP---W-QRGLRSAPAGCQVR
WP_019549855.1 EAVARKKALSEAVERL LACTPFALIARRPTPRDTRSRGTDDP---W-QRGLRSAPAGCQVR
WP_019887077.1 EAVARKKALSEAVERL LACTPFASVARPPTTHLTTG--DDRNPW-PAGVRTAPEGCLTR
EKX68557.1      KAVARLKALSEAVERL VACTPFASVVRPPTT----SRGSGAVPPFPASGVRTVPDGCASR
AFV25482.1      EAVARAKALSEAVERL VACTPFATVARPPTT-PAPGSGSGVPVPPFAAGVRTAPDGCASR
CCM09444.1      EAVARAKALSEAVERL VACTPFATVARPPTACADPGTSGSGVPVPPFAAGVRTAPEGCAGR
CBG72693.1      EAVARAKALSEAVERL VACTPFTAVARPPTAFADPGTSGSGVPVPPFAAGVRTAPDGCADR
:***  *****:*****:  :.*  **  .  :  *::.*  **  *

```

```

AFU90403.1      NYRSLSGE-QPRQVPLFWSSPWVAGEEMRSANLAPQAARLSSTVGWAVAPSPEALQGAL
WP_019549855.1 NYRSLSGE-QPRQVPLFWSSPWVAGEEMRSANLAPQAARLSSTVGWAVAPSPEALQGAL
WP_019887077.1 TYRPLTRGALPRQVPLFWSSPWIAGEELRSALLTAQTARLSSTIGWAVAPSPEALRGAL
EKX68557.1      VYRPLTGG-GPRRVPLYWSSPWTAGEELRAAVLTAPPEARLSSTVGWAVAPTPEALHGAL
AFV25482.1      EYRPLSGD-GPRRVPLYWSSPWVAGEELRAGTLSAAEARLSSTVGWAVAPTPEALRGAL
CCM09444.1      VYRPLTGG-GPRRVPLYWSSPWTAGAELRAGTLTAAEARLSSTVGWAVAPTPEGALRGAL
CBG72693.1      VYRPLTGG-GPRRVPLYWSSPWTAGAELRAGTLTAAQAARLSSTVGWAVAPTPEALRGAL
**  *:  **:*:**:*****  **  *:*:  *:  *****:*****:**  *:*:**

```

```

AFU90403.1      YELTELLNYGAFLYRCLAAPRERPAPGGGPEPREEGRIQTVPISWATRTPTILAVTRSSD
WP_019549855.1 YELTELLNYGAFLYRCLAAPRERPAPGGGPEPHEEGRTQTVPISWATRTPTILAVTRSSD
WP_019887077.1 FLTELLINYGVFLFRALAGPPHDGRDS-----GPGPLILPIDGATRTPTVLAVARGGG
EKX68557.1      LELTELLNHGVFLHRSLAGPRR--PAA-----GDETLVPLGGVVRTPTVLAVAYGRG
AFV25482.1      LELTELIDYGVFLHRRLAGPARP-RSA-----GDETLVVPLGGAVRTPTVLAVAYGRG
CCM09444.1      LELTELIDYGVFLHRRLAGPARR-PSA-----GDRTLVVPLGGIGRTPAVLAVAYGRG
CBG72693.1      LELTELIGYGVFLHRRLAGPPRR-PSG-----DDRTLVVPLEGVGRTPAVLAVAYGRG
*****:.*:***.*  **.*  .  .  :*:  *****:**:  .  .

```

```

AFU90403.1      RLMPATGIGSGTTASEAAERAFLELAQAETLWRANSTAVPAERYFMRRFEKWPLLRCAA
WP_019549855.1 RLMPATGIGSGTTASEAAERAFLELAQAETLWRANSTAVPAERYFMRRFEKWPLLRCAA
WP_019887077.1 RRMPATGLGSGTTRADATDRALLELAQAVTLWRSNPTGIPAERHFMRFRDWRPPLTRCAT
EKX68557.1      RRMPATGLGCGATRAEATDRALLELAQAETMWRSNPTAVPAERFFLRRFERWPLLRGCAT
AFV25482.1      RLMPATGLGCGASRAEATDRALLELAQAETMWRSNPTAEPAPERFFLRRFERWPLLRGCAT
CCM09444.1      RLMPATGLGCGATRGEATDRALLELAQAETMWRSNPTAEPAPERFFLRRFERWPLLRGCAT
CBG72693.1      RLMPATGLGCGETVAEATGRALLELAQAETMWRSNPTAEPAPERFFLRRFERWPLLRGCAT
*  *****:*.*  :  :*:  **:******  *:*:*  *  *  *****:*:**:*****  *****

```

```

AFU90403.1      LDFDLGEHA-----GPFDDGPHP-SPLGALES
WP_019549855.1 LDFDLGEHA-----GPFDDGPHP-SPLGALES
WP_019887077.1 LDFDLTGYDA-----P-PDGVPRPSPLEELEA
EKX68557.1      LDFDLSG-----HGTPYDDERSVASPLEELEA
AFV25482.1      LDFELSDLSGLDGLSGLDGLSRLDGLSRLDHPDLNDPAGRPAPYDDGHPASPLEELEA
CCM09444.1      LDFDLDPDRD-----PPARSGPAGGPGPYDDGPCPASPLEELEA
CBG72693.1      LDFDLKDADA-----PHGPH----DPAPGDDEPRPATPLEELEA
***:*  *  *  *  :**  **

```

```

AFU90403.1      RAIEVWADPGAVDISGADLRRLRCFAHVVSDPQLLGLVRAGIPVFDTGEVRKILVCPR
WP_019549855.1 RAIEVWADPGAVDISGADLRRLRCFAHVVSDPQLLGLVRAGIPVFDTGEVRKILVCPR

```



WP\_019549857.1 LIVSIPCDTGVPAYVVCDAESDEDVRLIGSGASPVQAYALQRGLELQVCTMYQHGPVD  
WP\_019887079.1 LVVDVTCDDVPAYVVCDAESREDVRLIGSGASPVRTYALQRALLEYLQVRTMFEHGPVD  
CCM09445.1 LIVDITCDDTGVPAAYVVCDAESREDVRLIGSGASPVRTYAVQRALLEYLQVRTMFEHGPVD  
CBG72692.1 LIVDITCDDTGVPAAYVVCDAESREDVRLIGSGASPVRTYAVQRALLEYLQVRTMFEHGPVD  
AFV25483.1 LIVDITCDDTGVPAAYVVCDAESREDVRLIGSGASPVRTYALQRALLEYLQVRTMFEHGPVD  
EKG68554.1 LIVSIACDDTGVPAAYVVCDAESREDVRLIGSGASPVRTYALQRALLEYLQVRTMFEHGPVD  
\*.\*.: \*\*.\*\*\*\*\*\* \* \*:\*\*\*\*\*\*:\*.\*\*.\*\*\*\*\*\* \*\*.:\*\*.\*

AFU90402.1 AEREAQIATALARYPRHLAAAGFDVRLPHERQPFDSG----LPAAATPEELLRHLID  
WP\_019549857.1 AEREAQIATALARYPRHLAAAGFDVRLPHERQPFDSG----LPAAATPEELLRHLID  
WP\_019887079.1 ADTEARQIGTALARYPRHLAAARFDIHELPHQVAFASDGLS---AAASPEDLLRHLVD  
CCM09445.1 ADTEAGQIGTALARYPRHLAAARFDIHLRPHESAFEADDGLP---AATGPERLLRHLVD  
CBG72692.1 ADTEAGQIGSALARYPRHLAAARFDIHLRPHESRAFEADDGLP---AATGPERLLRHLVD  
AFV25483.1 ADTEAGQIATALARYPRHLAAARFDVGLPHERAFDADDGLP---AAASPEQLLRHLVD  
EKG68554.1 ADTEAGQIATALARYPRHLAAARFDIHLRPHEMREFDADDGLPLLPAAASPEELLRHLVE  
\*:\* \*\*.\*.:\*\*\*\*\* \*\*.\*.\*\*\*\* \* :\*. \*\*.\* \*\*.\*:\*

AFU90402.1 RLQGVGVDLHFRVLTTPGVTITVVDVVPAGLEMLDKARAGYPVLPTRGLGERLRPQRREP-  
WP\_019549857.1 RLQGVGVDLHFRVLTTPGVTITVVDVVPAGLEMLDKARAGYPVLPTRGLGERLRPQRREP-  
WP\_019887079.1 RLRVAVRVDVHYRVLTRPGAVTVVDVVPAGLEMLDKARAGYPVLPTRGLAERLRSRGSERA  
CCM09445.1 RLRESGVEAHHRVLTTPGVPVTVDVVPAGLEMLDKARAGYPVLPTRGLGERLRPRGDGGG  
CBG72692.1 RLRESGIEAHHRVLTTPGVPVTVDVVPAGLEMLDKARAGYPVLPTRGLGERLRPRGDGGG  
AFV25483.1 RLRDLGVDVHHRVLTTPGVPVTVDVVPAGLEMLDKARAGYPVLPTRGLGERLRPRKDHRR  
EKG68554.1 RLREVGVDVHYRVLTRPGAVTVVDVVPAGLEMLDKARAGYPVLPTRGLGERLRPGTSGG-  
\*\*.\*: \*\*.\* \*\*.\*:\*\*\*\*\*:\*\*\*\*\*.\*\*\*\*

AFU90402.1 -----  
WP\_019549857.1 -----  
WP\_019887079.1 -----  
CCM09445.1 ARR-----  
CBG72692.1 ARR-----  
AFV25483.1 GHGVDHGKDRGGAPR  
EKG68554.1 -----TGRGGAPK

**Figure S5: Activity assessment of bottromycin cyclodehydratase C-terminal truncations.** Four C-terminal truncations to BmbD and five C-terminal truncations to BmbE were prepared to assess the importance to catalytic activity. Refer to Figure S4 for a depiction of the truncation locations.

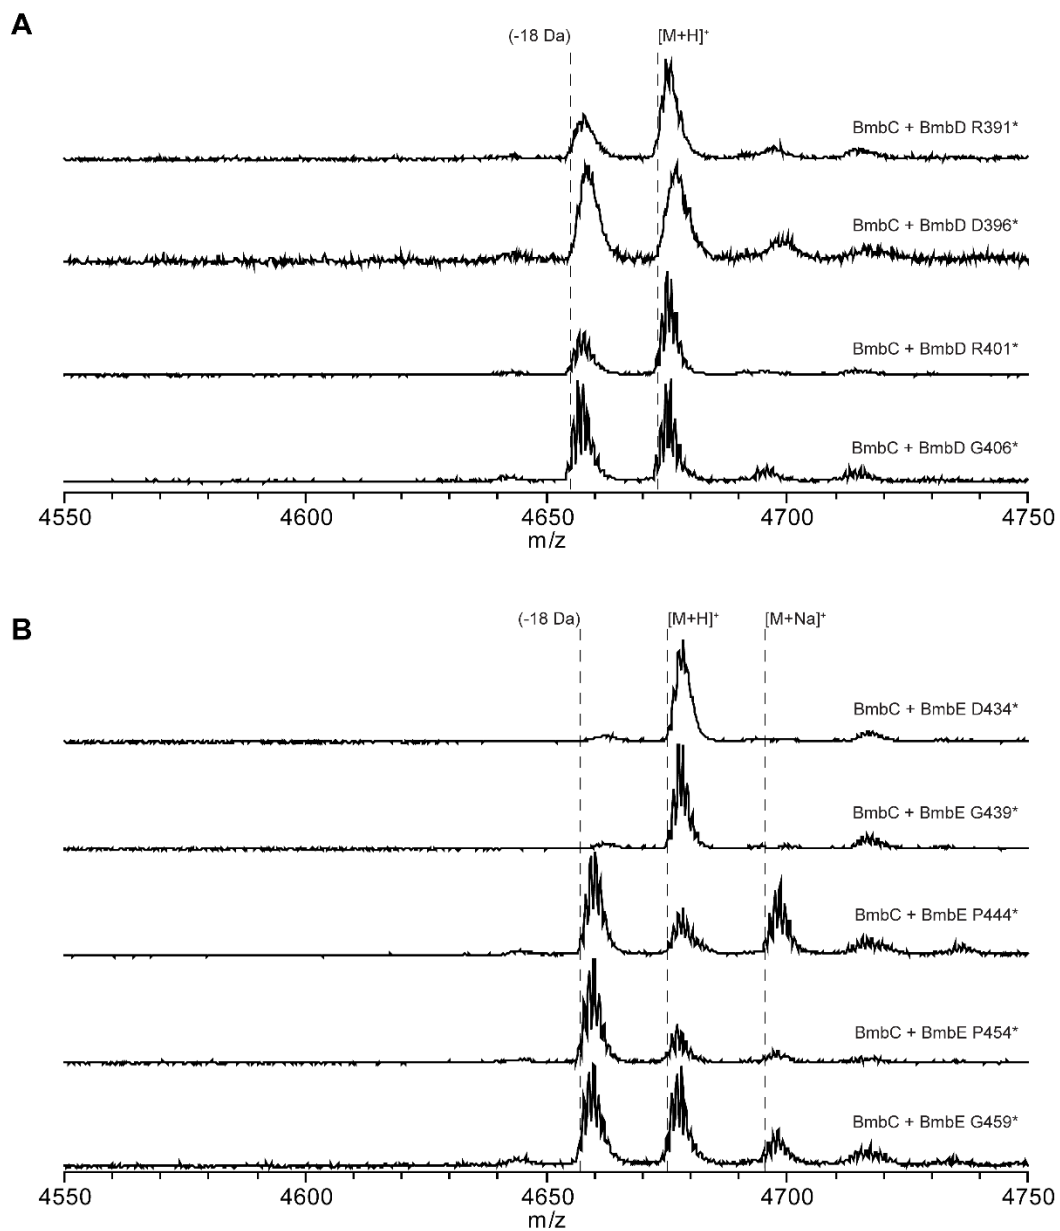



**Figure S6: Chemical labeling evidence for thiazoline and macrolactamidine formation.** Products of BmbD and BmbE cyclodehydratases are distinct, isobaric dehydrations of the bottromycin precursor peptide (BmbC). (A-B) Reaction products with BmbD or BmbE proteins were alkylated at the cysteine thiol with bromoethylamine or methylated at the N-terminus by reductive amination. Products of the reactions were visualized by MALDI-TOF MS as shifts of +28 Da for dimethylation of the thiazoline substrate and +43 Da for the ethylamine alkylated macrolactamidine substrate relative to the dehydrated product. (C) Precursor peptide mutant C8A was only processed by the macrolactamidine-forming enzyme.

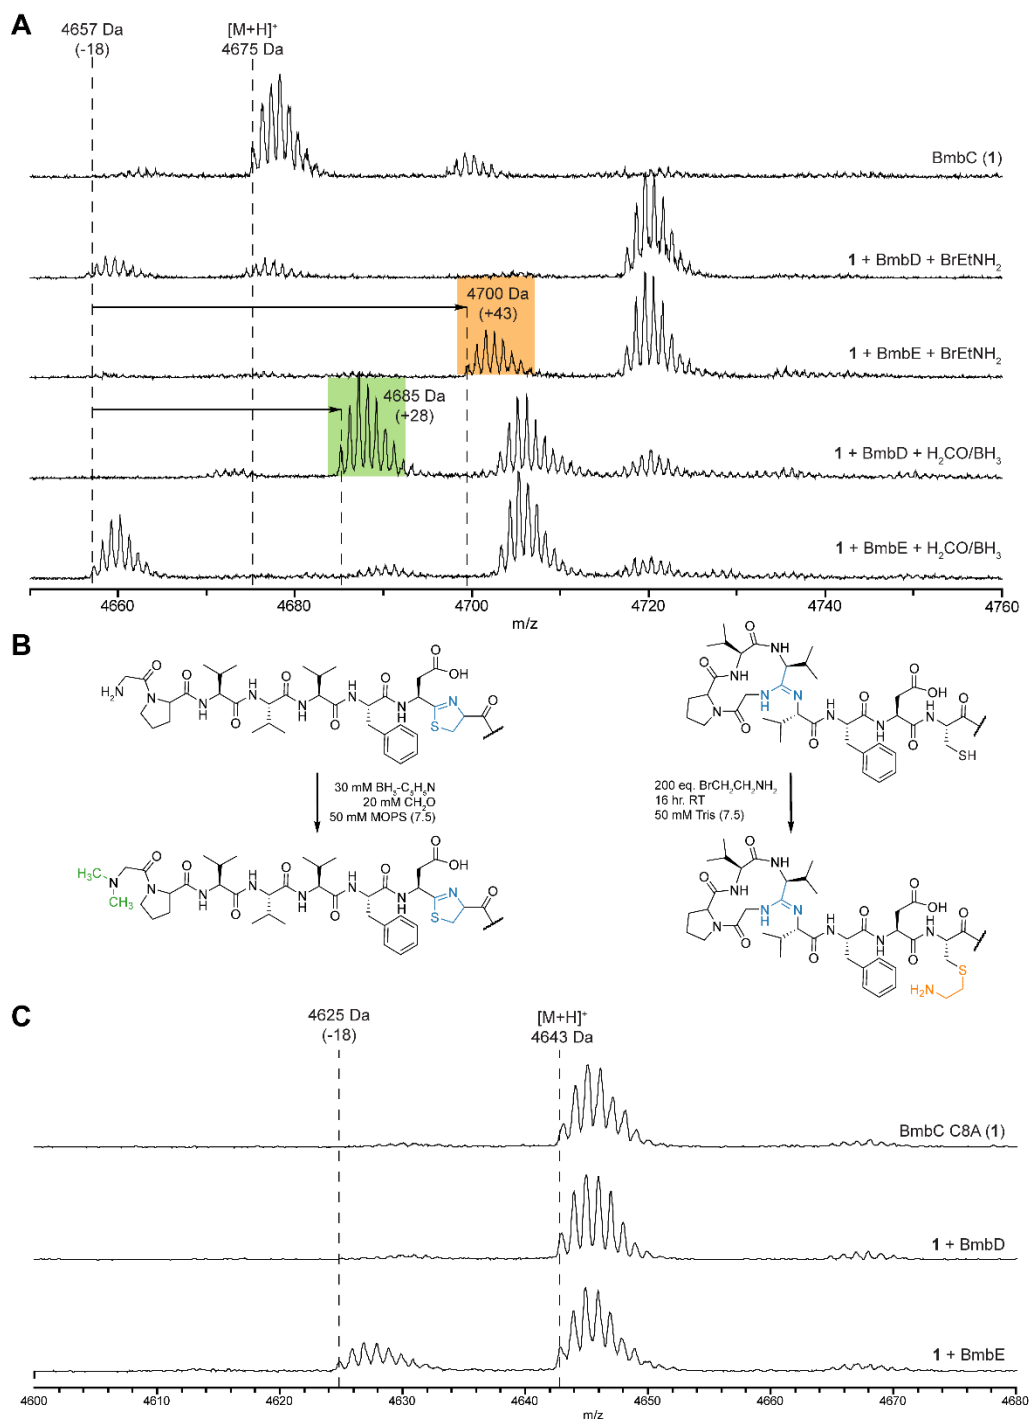

**Table S4: Precursor peptide sequences and processing by BmbD and BmbE YcaOs.** Processing was analyzed by endpoint MALDI-TOF MS for the presence of a dehydrated mass. Plus signs indicate the presence of a dehydrated mass while minus signs indicate only the parent peptide mass was detected. Sequence changes are highlighted in red. “N/A” indicates not applicable for processing *i.e.* no sulfhydryl side chain to generate a thiazoline. “\*” indicates mutation to a stop codon, “^” indicates an insertion mutation and “Δ” indicates a deletion mutation.

| Region varied | Variant | Sequence                                                 | BmbD processing | BmbE processing |
|---------------|---------|----------------------------------------------------------|-----------------|-----------------|
| Wild-type     | -       | GPVVVDCMTADFLNDDPNNAELSALEMEELESWGAWDGEATS               | +               | +               |
| Follower      | F13A    | GPVVVDCMTAD <del>A</del> LNDDPNNAELSALEMEELESWGAWDGEATS  | -               | -               |
| Follower      | L14A    | GPVVVDCMTADFL <del>A</del> NDDPNNAELSALEMEELESWGAWDGEATS | -               | +               |
| Follower      | N15A    | GPVVVDCMTADFL <del>A</del> DDPNNAELSALEMEELESWGAWDGEATS  | +               | +               |
| Follower      | D16A    | GPVVVDCMTADFLN <del>A</del> DPNNAELSALEMEELESWGAWDGEATS  | +               | +               |
| Follower      | D17A    | GPVVVDCMTADFLN <del>D</del> APNNAELSALEMEELESWGAWDGEATS  | +               | -               |
| Follower      | E22A    | GPVVVDCMTADFLNDDPNNA <del>A</del> LSALEMEELESWGAWDGEATS  | +               | +               |
| Follower      | L23A    | GPVVVDCMTADFLNDDPNNAE <del>A</del> SALEMEELESWGAWDGEATS  | -               | +               |
| Follower      | S24A    | GPVVVDCMTADFLNDDPNNAEL <del>A</del> ALEMEELESWGAWDGEATS  | -               | +               |
| Follower      | L26A    | GPVVVDCMTADFLNDDPNNAELSA <del>A</del> EMEELESWGAWDGEATS  | +               | +               |
| Follower      | E27A    | GPVVVDCMTADFLNDDPNNAELSA <del>L</del> AEMEELESWGAWDGEATS | -               | -               |
| Follower      | M28A    | GPVVVDCMTADFLNDDPNNAELSALE <del>A</del> EELESWGAWDGEATS  | +               | +               |
| Follower      | E29A    | GPVVVDCMTADFLNDDPNNAELSALE <del>M</del> AELSWGAWDGEATS   | +               | +               |
| Follower      | E30A    | GPVVVDCMTADFLNDDPNNAELSALEME <del>A</del> LESWGAWDGEATS  | +               | +               |
| Follower      | L31A    | GPVVVDCMTADFLNDDPNNAELSALEMEE <del>A</del> ESWGAWDGEATS  | -               | -               |
| Follower      | E32A    | GPVVVDCMTADFLNDDPNNAELSALEMEE <del>L</del> ASWGAWDGEATS  | +               | +               |
| Follower      | D16*    | GPVVVDCMTADFLN                                           | -               | -               |
| Follower      | A21*    | GPVVVDCMTADFLNDDPNN                                      | -               | -               |
| Follower      | L26*    | GPVVVDCMTADFLNDDPNNAELSA                                 | -               | -               |
| Follower      | L31*    | GPVVVDCMTADFLNDDPNNAELSALEMEE                            | -               | -               |
| Follower      | E32*    | GPVVVDCMTADFLNDDPNNAELSALEMEE                            | -               | -               |
| Follower      | S33*    | GPVVVDCMTADFLNDDPNNAELSALEMEE                            | -               | -               |
| Follower      | W34*    | GPVVVDCMTADFLNDDPNNAELSALEMEELES                         | -               | -               |
| Follower      | G35*    | GPVVVDCMTADFLNDDPNNAELSALEMEELESW                        | +               | +               |
| Follower      | A36*    | GPVVVDCMTADFLNDDPNNAELSALEMEELESWG                       | +               | +               |
| Follower      | N15K    | GPVVVDCMTADFL <del>K</del> DDPNNAELSALEMEELESWGAWDGEATS  | +               | +               |
| Core          | ^2P     | <del>G</del> PVVVDCMTADFLNDDPNNAELSALEMEELESWGAWDGEATS   | -               | -               |
| Core          | ^2A     | <del>G</del> APVVVDCMTADFLNDDPNNAELSALEMEELESWGAWDGEATS  | -               | -               |
| Core          | ^2G     | <del>G</del> GPVVVDCMTADFLNDDPNNAELSALEMEELESWGAWDGEATS  | -               | -               |
| Core          | P2G     | <del>G</del> GVVVDCMTADFLNDDPNNAELSALEMEELESWGAWDGEATS   | +               | +               |
| Core          | ΔP2     | GVVVDCMTADFLNDDPNNAELSALEMEELESWGAWDGEATS                | +               | -               |
| Core          | ΔV3     | GPVVDCMTADFLNDDPNNAELSALEMEELESWGAWDGEATS                | -               | -               |
| Core          | V3A     | GP <del>A</del> VVDCMTADFLNDDPNNAELSALEMEELESWGAWDGEATS  | -               | +               |
| Core          | V4A     | GPV <del>A</del> VDCMTADFLNDDPNNAELSALEMEELESWGAWDGEATS  | -               | +               |
| Core          | V4G     | GPV <del>G</del> VDCMTADFLNDDPNNAELSALEMEELESWGAWDGEATS  | -               | -               |
| Core          | V4I     | GPV <del>I</del> VDCMTADFLNDDPNNAELSALEMEELESWGAWDGEATS  | +               | +               |
| Core          | V5A     | GPVV <del>A</del> FDCMTADFLNDDPNNAELSALEMEELESWGAWDGEATS | -               | +               |
| Core          | V5G     | GPVV <del>G</del> FDCMTADFLNDDPNNAELSALEMEELESWGAWDGEATS | -               | +               |
| Core          | V5L     | GPVV <del>L</del> FDCMTADFLNDDPNNAELSALEMEELESWGAWDGEATS | +               | +               |
| Core          | D7A     | GPVVVF <del>A</del> CMTADFLNDDPNNAELSALEMEELESWGAWDGEATS | +               | +               |
| Core          | D7N     | GPVVVF <del>N</del> CMTADFLNDDPNNAELSALEMEELESWGAWDGEATS | +               | +               |
| Core          | D7T     | GPVVVF <del>T</del> CMTADFLNDDPNNAELSALEMEELESWGAWDGEATS | +               | +               |
| Core          | C8A     | GPVVVFD <del>A</del> MTADFLNDDPNNAELSALEMEELESWGAWDGEATS | N/A             | +               |
| Core          | C8P     | GPVVVFD <del>P</del> MTADFLNDDPNNAELSALEMEELESWGAWDGEATS | N/A             | -               |
| Core          | ^9C     | GPVVVFD <del>C</del> MTADFLNDDPNNAELSALEMEELESWGAWDGEATS | -               | -               |
| Core          | ^9S     | GPVVVFD <del>S</del> MTADFLNDDPNNAELSALEMEELESWGAWDGEATS | -               | -               |
| Core          | ^9T     | GPVVVFD <del>T</del> MTADFLNDDPNNAELSALEMEELESWGAWDGEATS | -               | -               |

**Figure S7 (i-xvi): Tandem MS fragmentation of bottromycin cyclodehydratase products.** Thiazoline and macrolactamidine formation were confirmed by MS/MS fragmentation. (A) schematic representation of the modified products and (B) fragmentation data with assigned peaks corresponding to the ions of interest. Mutated residues are shown in red. Mass values are given in **Table S5**.

**Figure S7i: BmbC + BmbD**

**A**

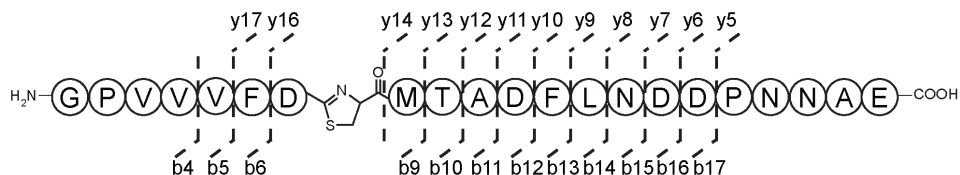

**B**

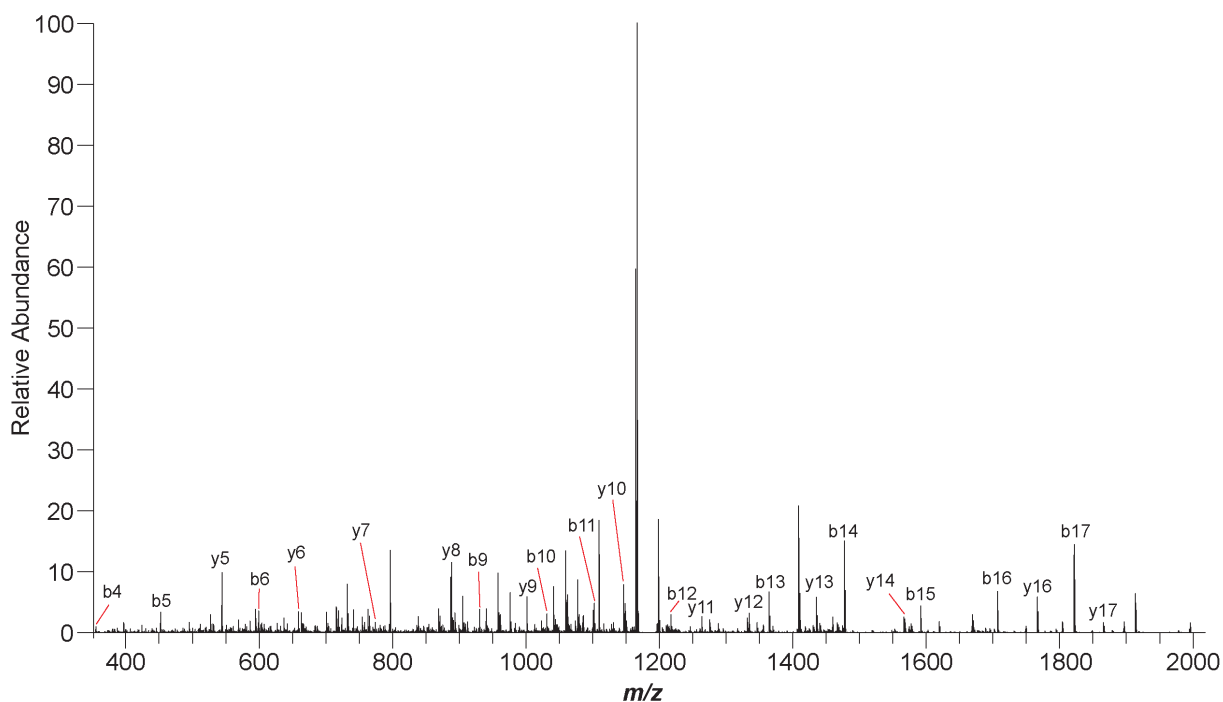

(MS fragment assignments in **Table S5i**)

**Figure S7ii: BmbC + BmbE**

**A**

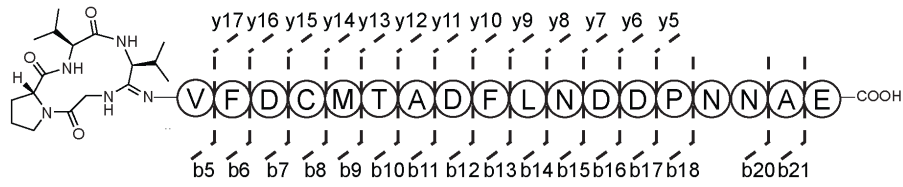

**B**

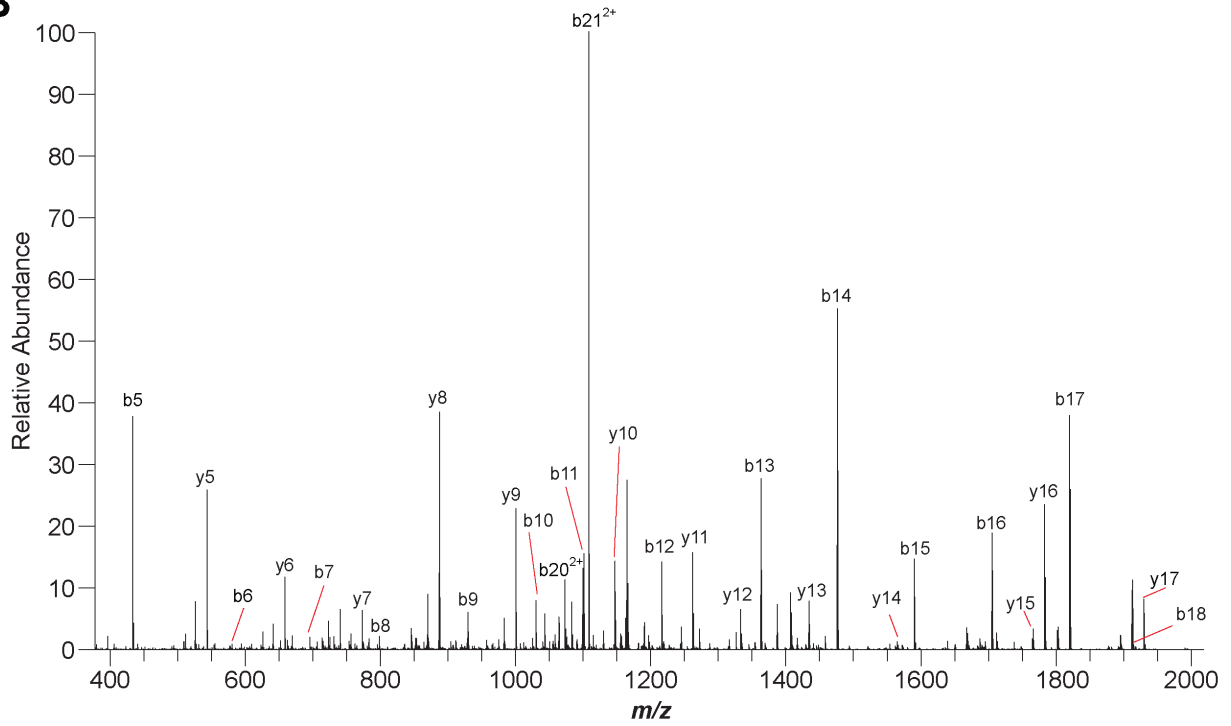

(MS fragment assignments in **Table S5ii**)

Figure S7iii: BmbC-C8A + BmbE

**A**

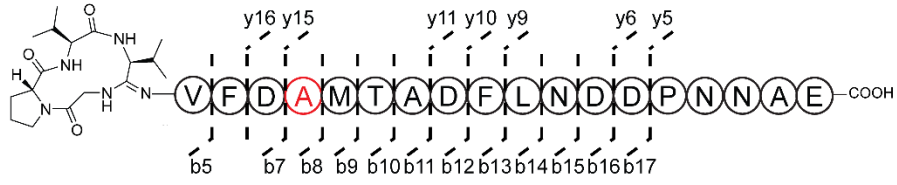

**B**

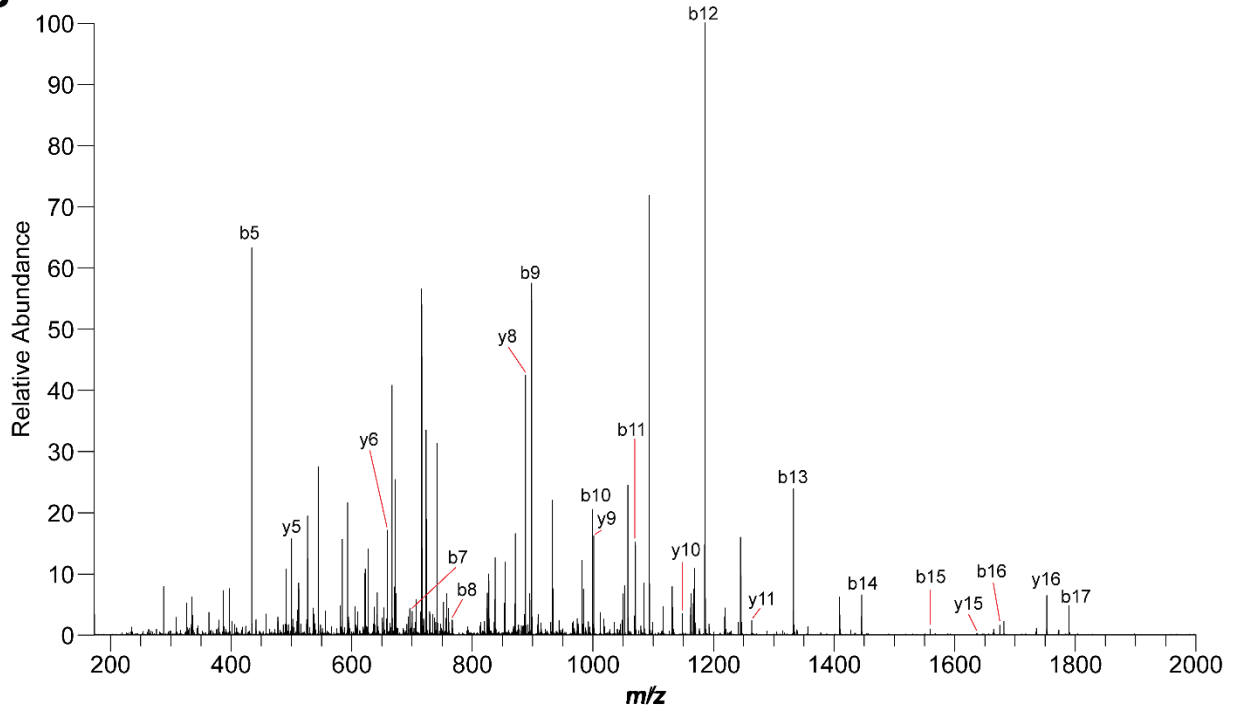

(MS fragment assignments in Table S5iii)

**Figure S7iv: BmbC-D7A + BmbD**

**A**

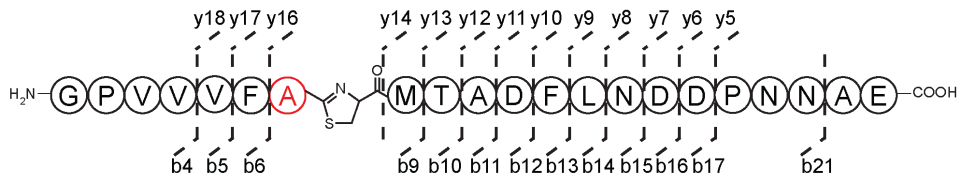

**B**

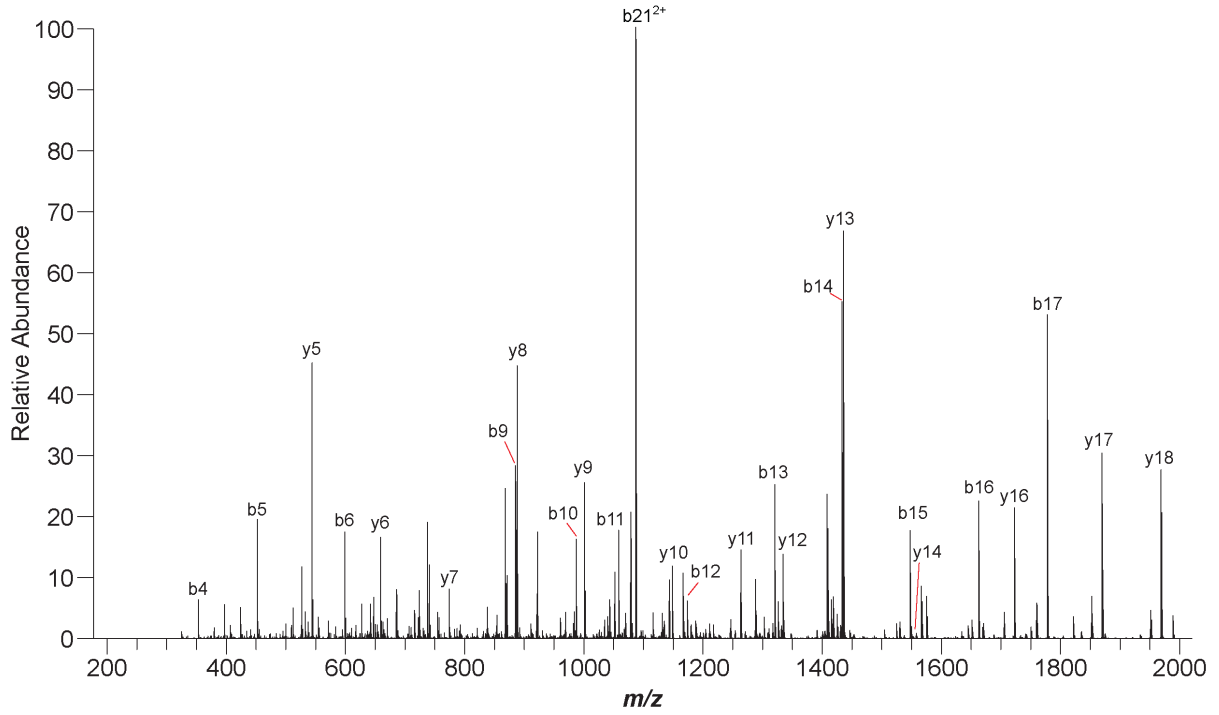

(MS fragment assignments in **Table S5iv**)

**Figure S7v: BmbC-D7A + BmbE**

**A**

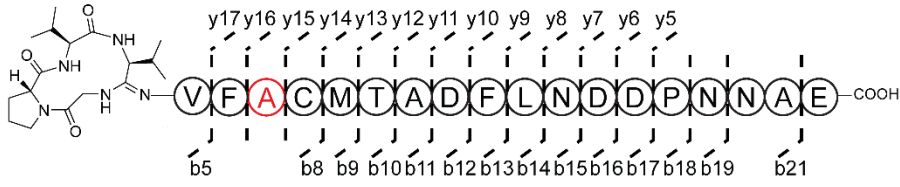

**B**

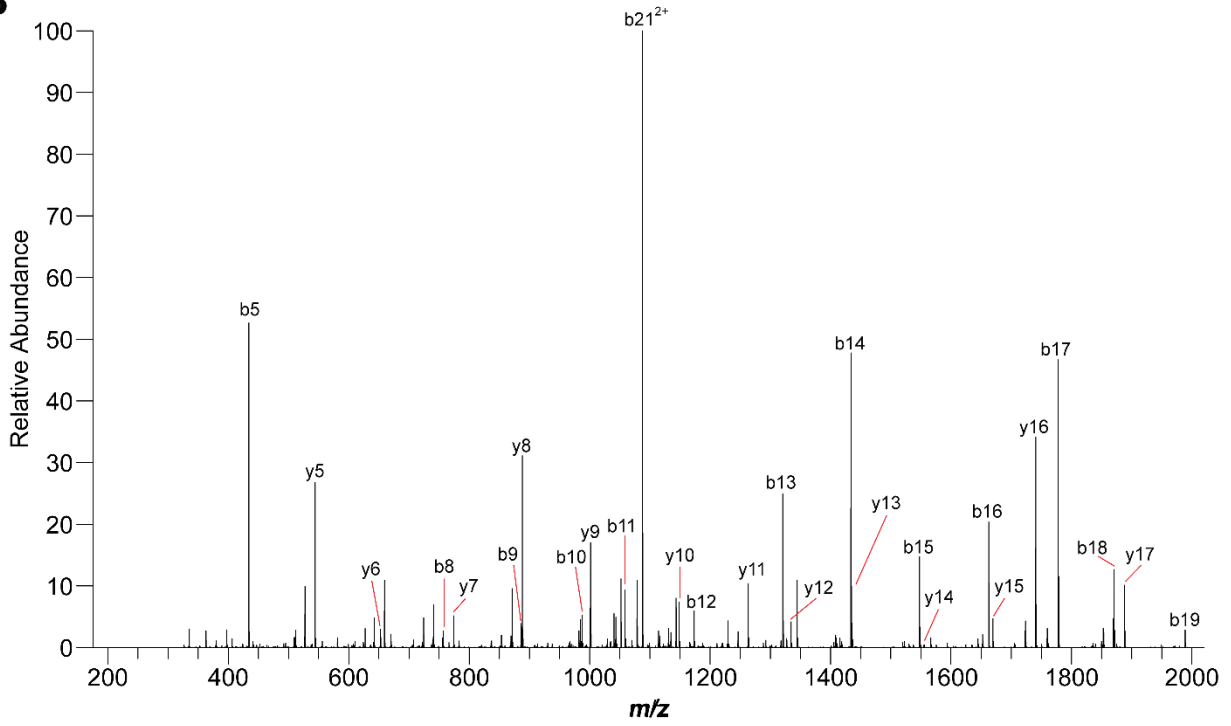

(MS fragment assignments in **Table S5v**)

**Figure S7vi: BmbC-D7N + BmbD**

**A**

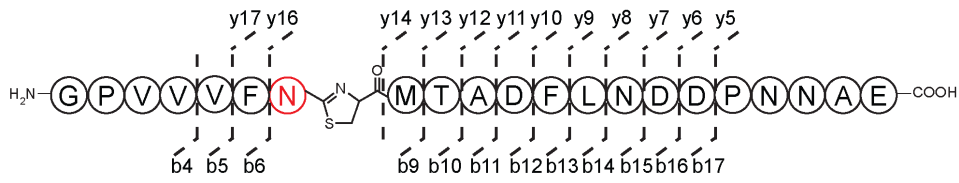

**B**

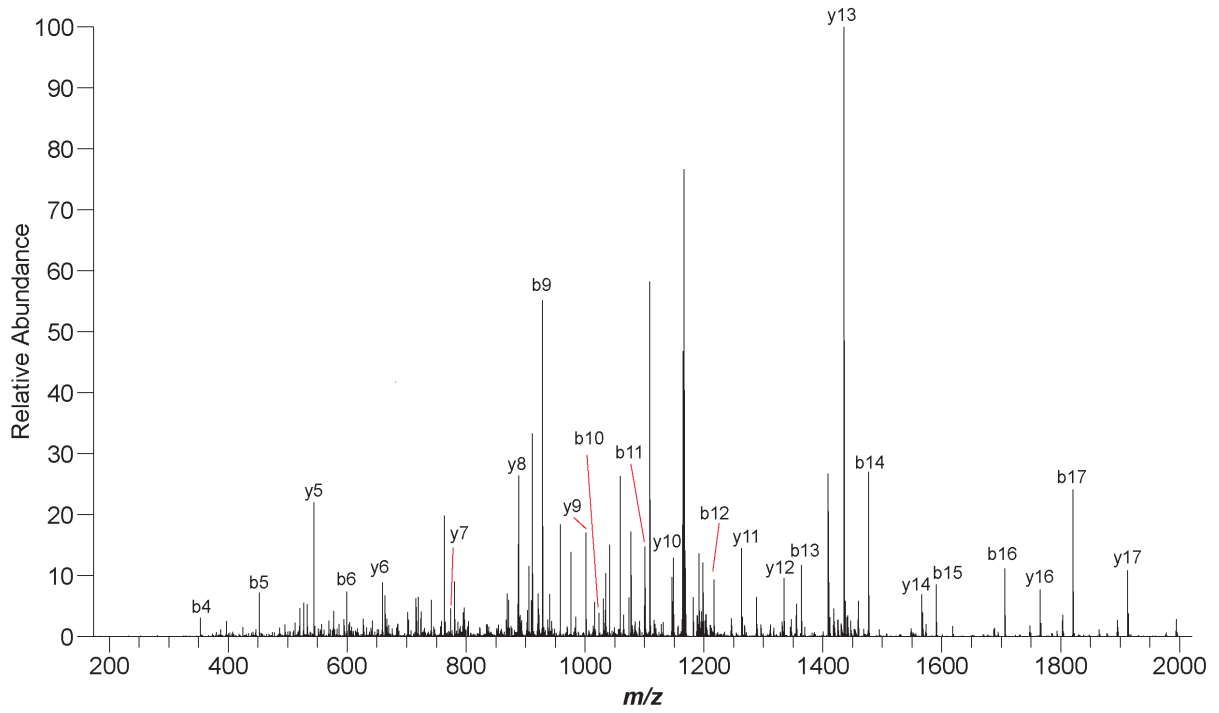

(MS fragment assignments in **Table S5vi**)



**Figure S7vii: BmbC-D7N + BmbE**

**A**

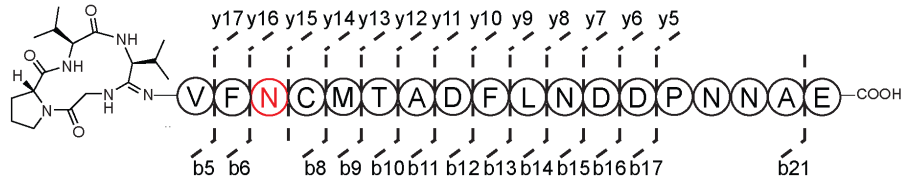

**B**

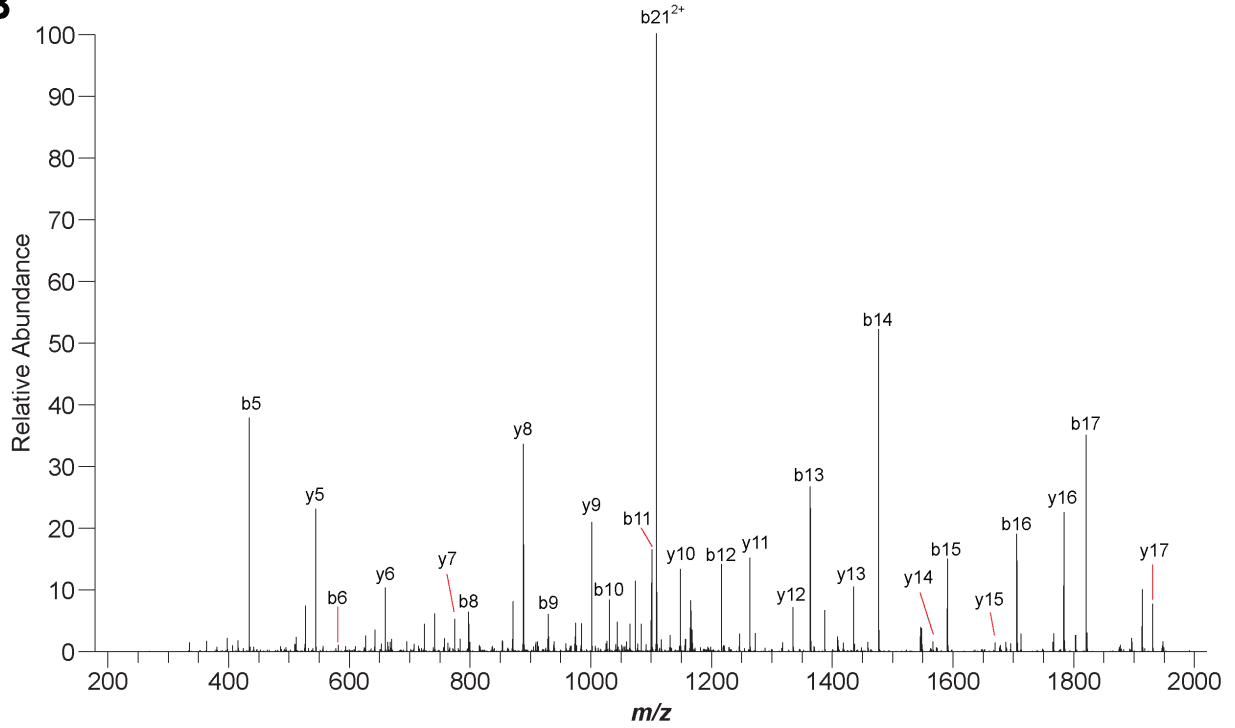

(MS fragment assignments in **Table S5vii**)

**Figure S7viii: BmbC-D7T + BmbD**

**A**

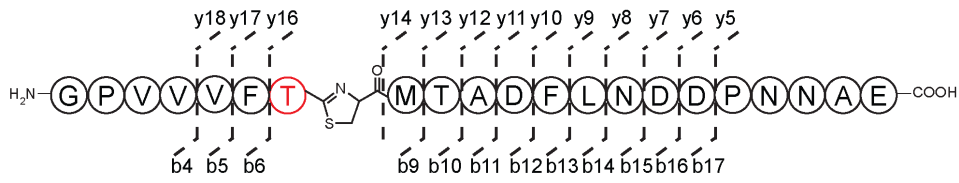

**B**

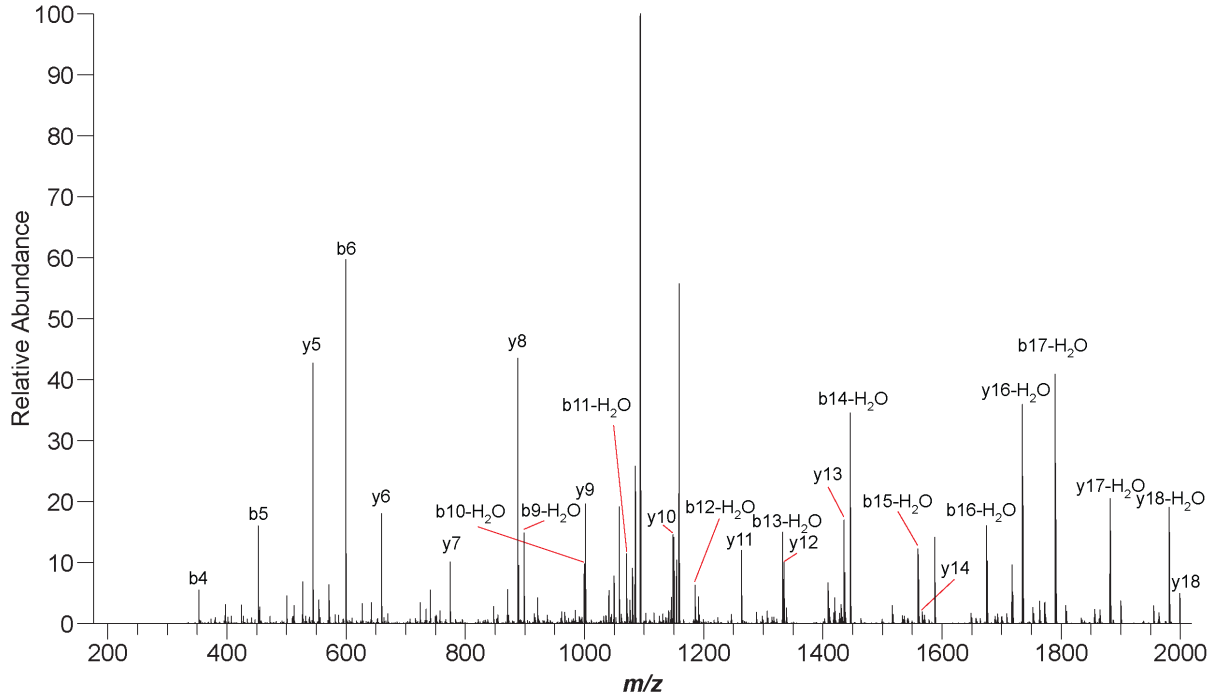

(MS fragment assignments in **Table S5viii**)

**Figure S7ix: BmbC-D7T + BmbE**

**A**

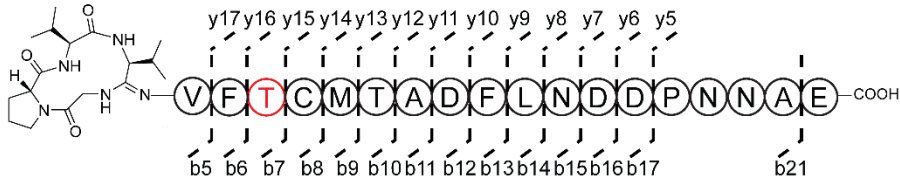

**B**

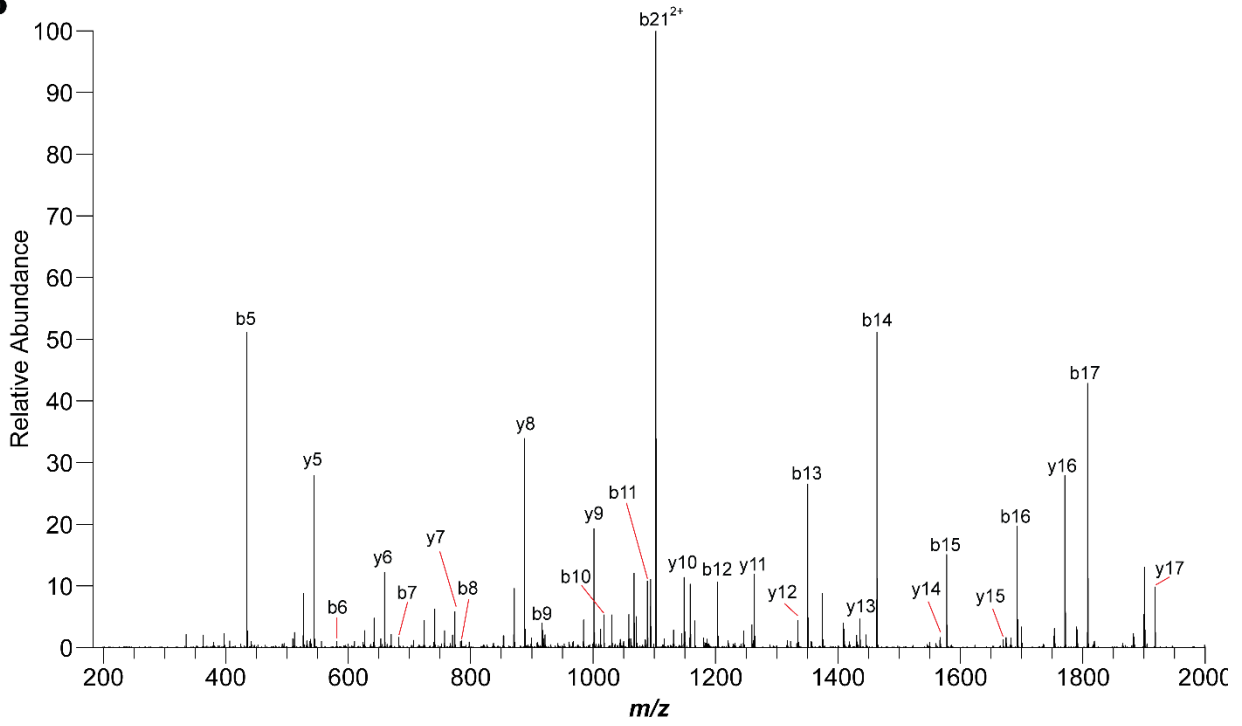

(MS fragment assignments in **Table S5ix**)

**Figure S7x: BmbC- $\Delta$ P2 + BmbD**

**A**

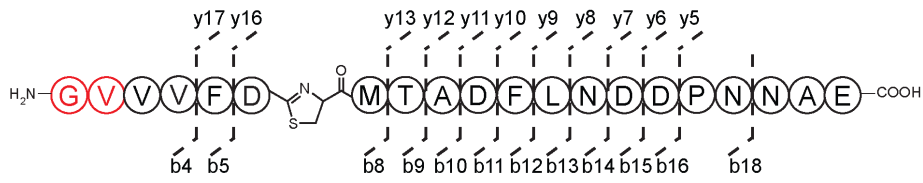

**B**

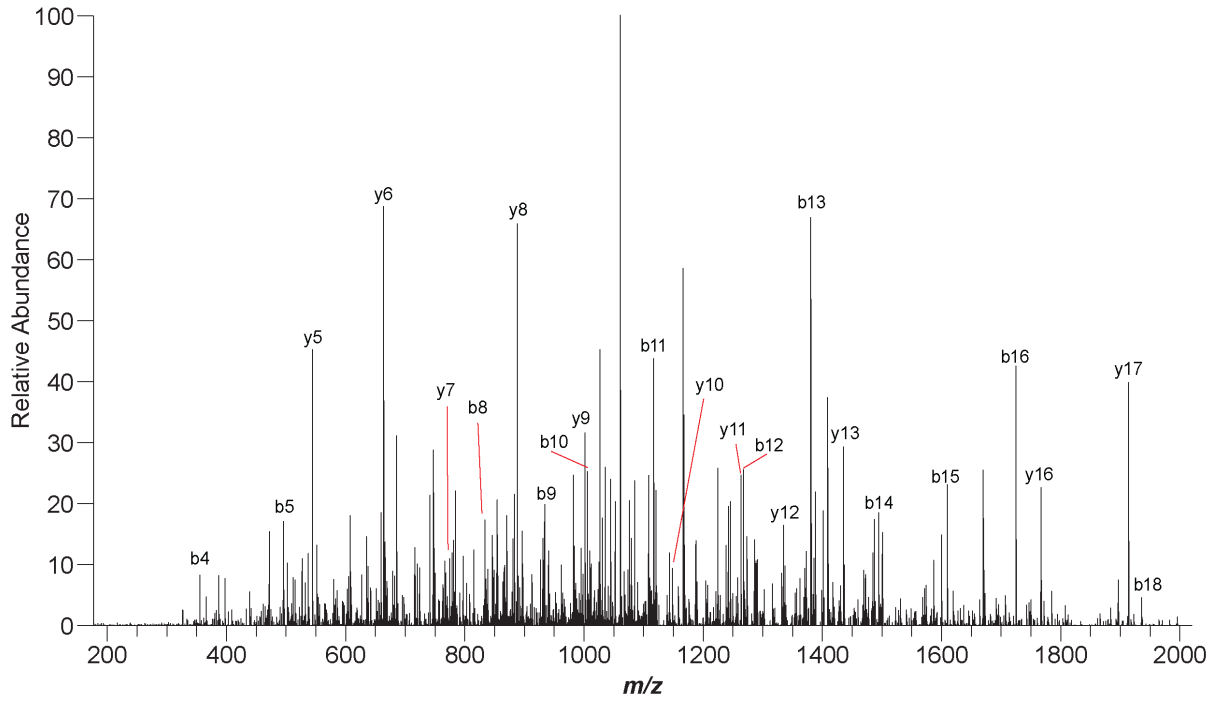

(MS fragment assignments in **Table S5x**)

**Figure S7xi: BmbC-P2G + BmbD**

**A**

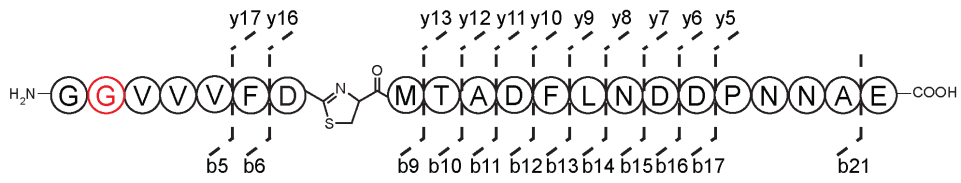

**B**

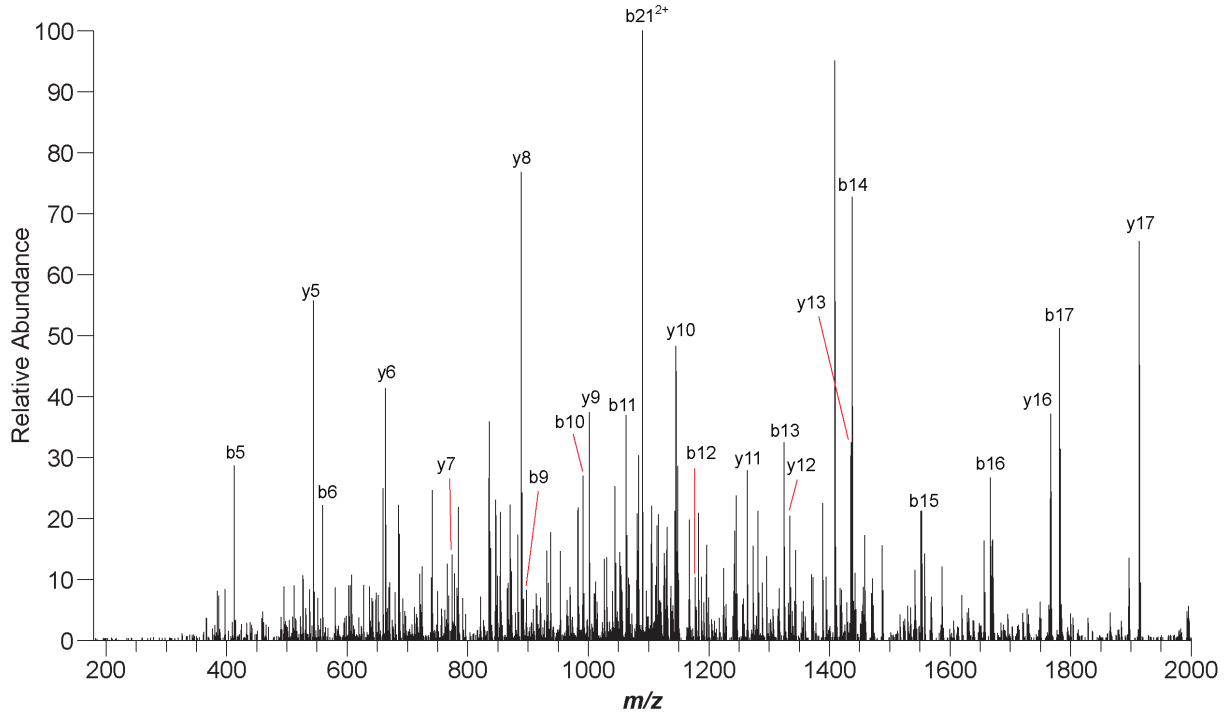

(MS fragment assignments in **Table S5xi**)

Figure S7xii: BmbC-P2G + BmbE

**A**

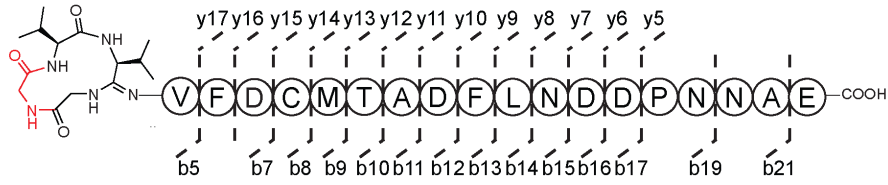

**B**

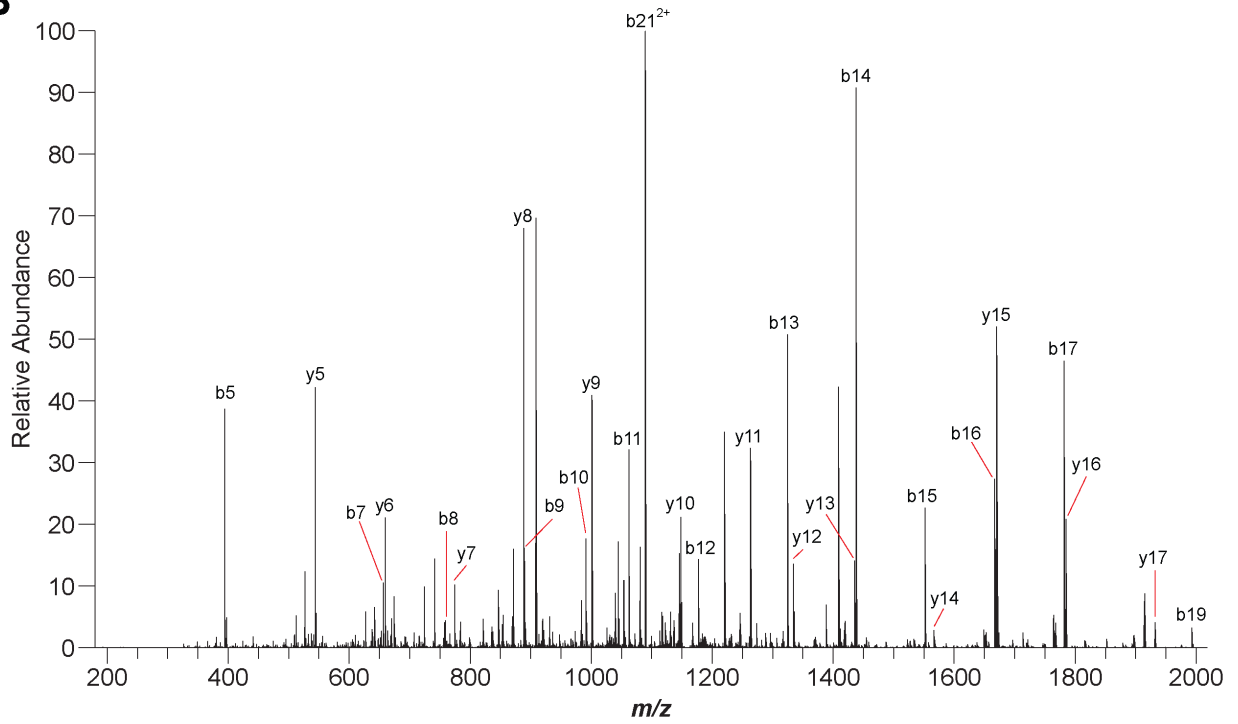

(MS fragment assignments in **Table S5xii**)

Figure S7xiii: BmbC-V5G + BmbE

**A**

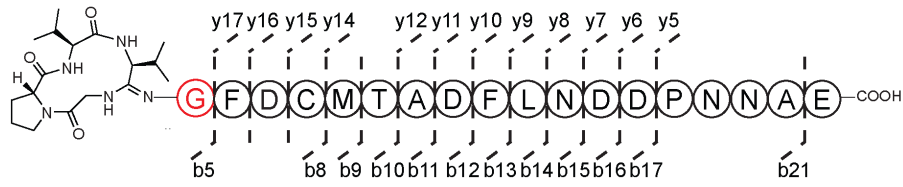

**B**

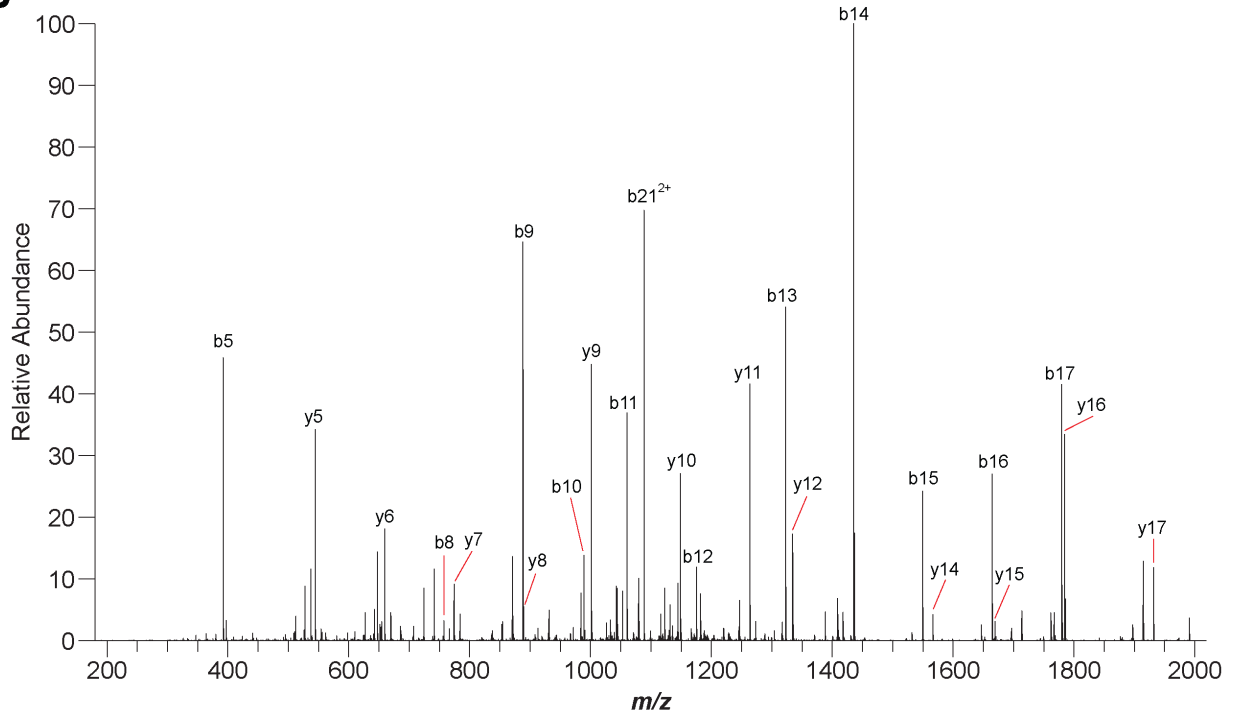

(MS fragment assignments in **Table S5xiii**)

**Figure S7xiv: BmbC-V5L + BmbD**

**A**

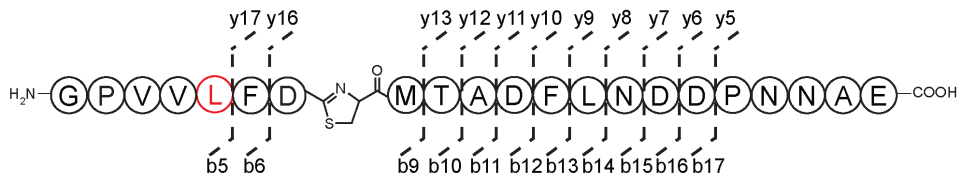

**B**

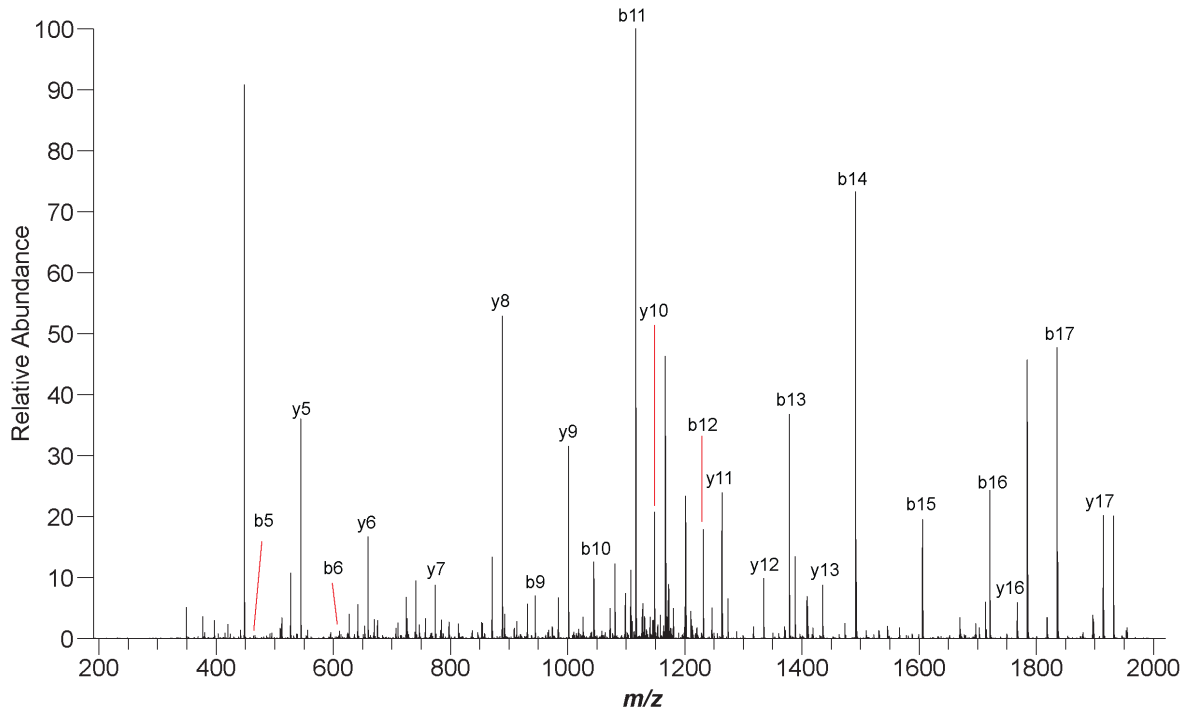

(MS fragment assignments in **Table S5xiv**)



**Figure S7xv: BmbC-V5L + BmbE**

**A**

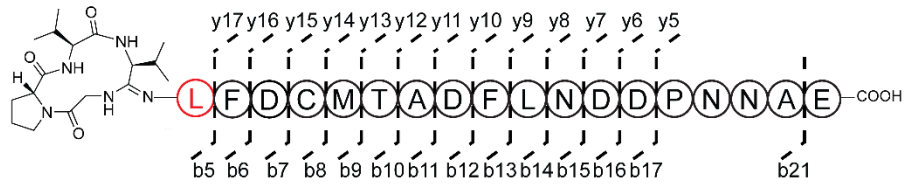

**B**

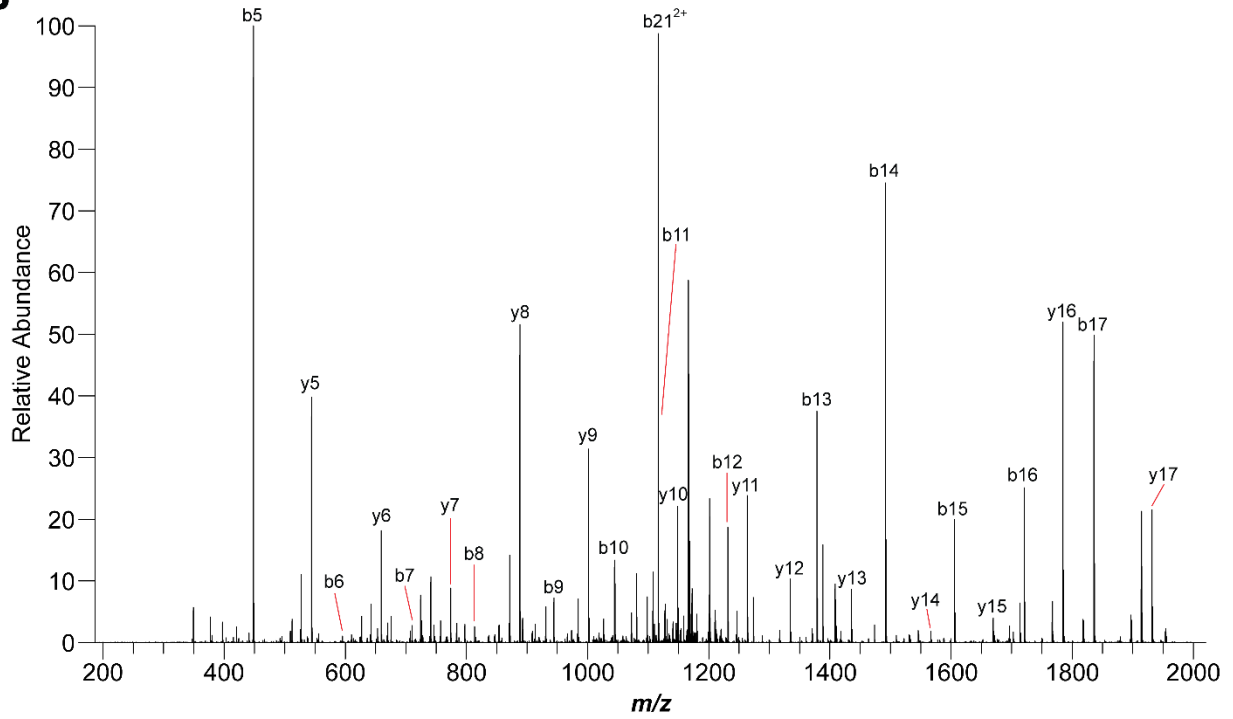

(MS fragment assignments in **Table S5xv**)

**Figure S7xvi: BmbC-V3A, V4A, V4I, V5A + BmbE.**

**A**

V3A

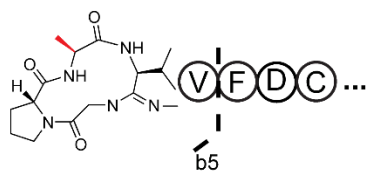

V4A

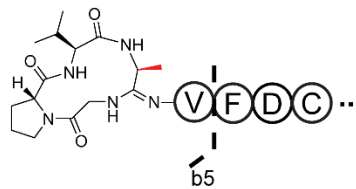

V4I

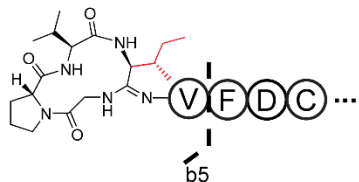

V5A

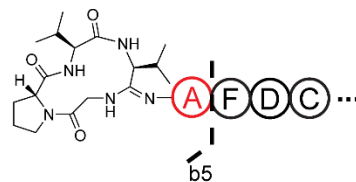

**B**

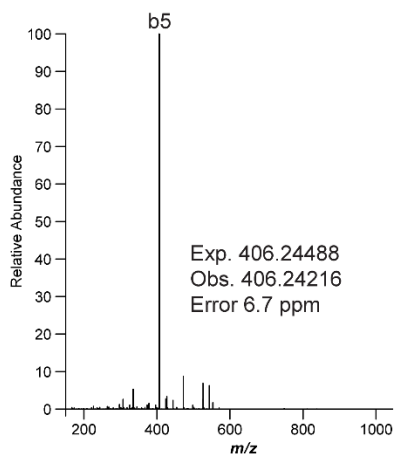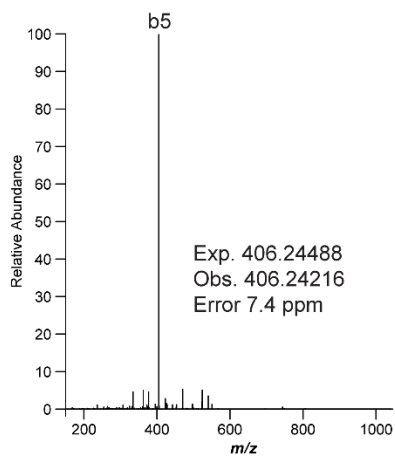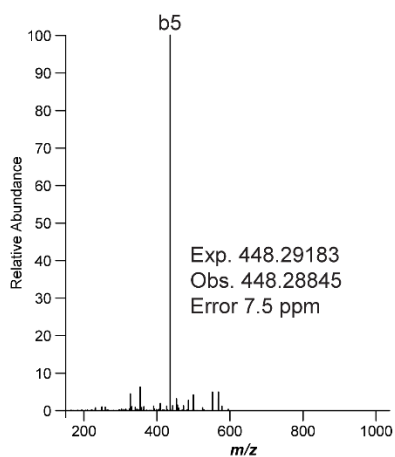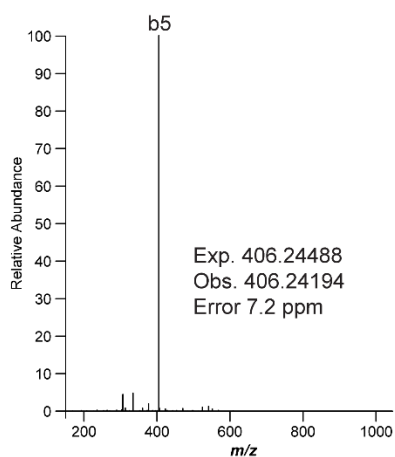

**Table S5 (i-xv): MS fragment assignments.**

**Table S5i: Tandem MS assignments.** Mass values assigned to the cyclodehydration products with calculated and observed values and associated error.

**BmbC + BmbD:**

| Species | Predicted mass (Da) | Observed mass (Da) | Error (ppm) |
|---------|---------------------|--------------------|-------------|
| b4      | 353.21833           | 353.21868          | 1.0         |
| b5      | 452.28675           | 452.28714          | 0.9         |
| b6      | 599.35516           | 599.35572          | 0.9         |
| b9      | 930.42121           | 930.42162          | 0.4         |
| b10     | 1031.46889          | 1031.46966         | 0.7         |
| b11     | 1102.50600          | 1102.50637         | 0.3         |
| b12     | 1217.53294          | 1217.53380         | 0.7         |
| b13     | 1364.60136          | 1364.60259         | 0.9         |
| b14     | 1477.68542          | 1477.68786         | 1.7         |
| b15     | 1591.72835          | 1591.73062         | 1.4         |
| b16     | 1706.75529          | 1706.75764         | 1.4         |
| b17     | 1821.78223          | 1821.78512         | 1.6         |
| y5      | 544.23617           | 544.23669          | 1.0         |
| y6      | 659.26311           | 659.26379          | 1.0         |
| y7      | 774.29005           | 774.29058          | 0.7         |
| y8      | 888.33298           | 888.33414          | 1.3         |
| y9      | 1001.41704          | 1001.41641         | 0.6         |
| y10     | 1148.48546          | 1148.48990         | 3.9         |
| y11     | 1263.51240          | 1263.51402         | 1.3         |
| y12     | 1334.54951          | 1334.55133         | 1.4         |
| y13     | 1435.59719          | 1435.59928         | 1.5         |
| y14     | 1566.63768          | 1566.64026         | 1.6         |
| y16     | 1766.66324          | 1766.67467         | 6.5         |
| y17     | 1913.73165          | 1913.73419         | 1.3         |

**Table S5ii: Tandem MS assignments.** Mass values assigned to the cyclodehydration products with calculated and observed values and associated error.

**BmbC + BmbE:**

| Species           | Predicted mass (Da) | Observed mass (Da) | Error (ppm) |
|-------------------|---------------------|--------------------|-------------|
| b5                | 434.27618           | 434.27555          | 1.5         |
| b6                | 581.34460           | 581.34381          | 1.4         |
| b7                | 696.37154           | 696.37068          | 1.2         |
| b8                | 799.38072           | 799.37968          | 1.3         |
| b9                | 930.42121           | 930.41991          | 1.4         |
| b10               | 1031.46889          | 1031.46764         | 1.2         |
| b11               | 1102.50600          | 1102.50472         | 1.2         |
| b12               | 1217.53294          | 1217.53139         | 1.3         |
| b13               | 1364.60136          | 1364.59980         | 1.1         |
| b14               | 1477.68542          | 1477.68371         | 1.2         |
| b15               | 1591.72835          | 1591.72693         | 0.9         |
| b16               | 1706.75529          | 1706.75315         | 1.3         |
| b17               | 1821.78223          | 1821.77975         | 1.4         |
| b18               | 1918.83500          | 1918.83296         | 1.1         |
| b20 <sup>2+</sup> | 1073.96406          | 1073.96278         | 1.2         |
| b21 <sup>2+</sup> | 1109.48262          | 1109.48116         | 1.3         |
| y5                | 544.23617           | 544.23563          | 1.0         |
| y6                | 659.26311           | 659.26252          | 0.9         |
| y7                | 774.29005           | 774.28908          | 1.3         |
| y8                | 888.33298           | 888.33201          | 1.1         |
| y9                | 1001.41704          | 1001.41541         | 1.6         |
| y10               | 1148.48546          | 1148.48413         | 1.2         |
| y11               | 1263.51240          | 1263.51050         | 1.5         |
| y12               | 1334.54951          | 1334.54765         | 1.4         |
| y13               | 1435.59719          | 1435.59599         | 0.8         |
| y14               | 1566.63768          | 1566.63602         | 1.1         |
| y15               | 1669.64686          | 1669.64441         | 1.5         |
| y16               | 1784.67381          | 1784.68727         | 7.5         |
| y17               | 1931.74222          | 1931.73938         | 1.5         |

**Table S5iii: Tandem MS assignments.** Mass values assigned to the cyclodehydration products with calculated and observed values and associated error.

**BmbC-C8A + BmbE:**

| Species           | Predicted mass (Da) | Observed mass (Da) | Error (ppm) |
|-------------------|---------------------|--------------------|-------------|
| b5                | 434.27618           | 434.27582          | 0.8         |
| b6                | 696.37154           | 696.37122          | 0.5         |
| b7                | 767.40865           | 767.40771          | 1.2         |
| b8                | 898.44914           | 898.44855          | 0.7         |
| b9                | 999.49681           | 999.49628          | 0.5         |
| b10               | 1070.53393          | 1070.53333         | 0.6         |
| b11               | 1185.56087          | 1185.56006         | 0.7         |
| b12               | 1332.62929          | 1332.62830         | 0.7         |
| b13               | 1445.71335          | 1445.71289         | 0.3         |
| b14               | 1559.75628          | 1559.75452         | 1.1         |
| b15               | 1674.78322          | 1674.78296         | 0.2         |
| b16               | 1789.81016          | 1789.80908         | 0.6         |
| b17               | 544.23617           | 544.23578          | 0.7         |
| b18               | 659.26311           | 659.26282          | 0.4         |
| b20 <sup>2+</sup> | 888.33298           | 888.33246          | 0.6         |
| b21 <sup>2+</sup> | 1001.41704          | 1001.41467         | 2.4         |
| y5                | 1148.48546          | 1148.48474         | 0.6         |
| y6                | 1263.51240          | 1263.51184         | 0.4         |
| y7                | 1637.67479          | 1637.67358         | 0.7         |
| y8                | 1752.70173          | 1752.71648         | 8.4         |

**Table S5iv: Tandem MS assignments.** Mass values assigned to the cyclodehydration products with calculated and observed values and associated error.

**BmbC-D7A + BmbD:**

| Species           | Predicted mass (Da) | Observed mass (Da) | Error (ppm) |
|-------------------|---------------------|--------------------|-------------|
| b4                | 452.28675           | 452.28659          | 0.4         |
| b5                | 599.35516           | 599.35504          | 0.2         |
| b6                | 696.37154           | 696.37068          | 1.2         |
| b9                | 886.43138           | 886.43825          | 7.8         |
| b10               | 987.47906           | 987.47867          | 0.4         |
| b11               | 1058.51617          | 1058.51548         | 0.7         |
| b12               | 1173.54311          | 1173.54219         | 0.8         |
| b13               | 1320.61153          | 1320.61073         | 0.6         |
| b14               | 1433.69559          | 1433.69538         | 0.1         |
| b15               | 1547.73852          | 1547.73787         | 0.4         |
| b16               | 1662.76548          | 1662.76455         | 0.6         |
| b17               | 1777.79240          | 1777.79163         | 0.4         |
| b21 <sup>2+</sup> | 1087.48770          | 1087.48716         | 0.5         |
| y5                | 544.23617           | 544.23607          | 0.2         |
| y6                | 659.26311           | 659.26305          | 0.1         |
| y7                | 774.29005           | 774.28992          | 0.2         |
| y8                | 888.33298           | 888.33253          | 0.5         |
| y9                | 1001.41704          | 1001.41543         | 1.6         |
| y10               | 1148.48546          | 1148.48520         | 0.2         |
| y11               | 1263.51240          | 1263.51177         | 0.5         |
| y12               | 1334.54951          | 1334.54906         | 0.3         |
| y13               | 1435.59719          | 1435.59682         | 0.3         |
| y14               | 1566.63768          | 1566.63772         | 0.0         |
| y16               | 1722.67341          | 1722.67843         | 2.9         |
| y17               | 1869.74183          | 1869.74139         | 0.2         |
| y18               | 1968.81024          | 1968.80952         | 0.4         |

**Table S5v: Tandem MS assignments.** Mass values assigned to the cyclodehydration products with calculated and observed values and associated error.

**BmbC-D7A + BmbE:**

| Species           | Predicted mass (Da) | Observed mass (Da) | Error (ppm) |
|-------------------|---------------------|--------------------|-------------|
| b5                | 434.27618           | 434.27591          | 0.6         |
| b8                | 755.39089           | 755.39060          | 0.4         |
| b9                | 886.43138           | 886.43069          | 0.8         |
| b10               | 987.47906           | 987.47861          | 0.5         |
| b11               | 1058.51617          | 1058.51559         | 0.5         |
| b12               | 1173.54311          | 1173.54205         | 0.9         |
| b13               | 1320.61153          | 1320.61072         | 0.6         |
| b14               | 1433.69559          | 1433.69514         | 0.3         |
| b15               | 1547.73852          | 1547.73779         | 0.5         |
| b16               | 1662.76546          | 1662.76433         | 0.7         |
| b17               | 1777.79240          | 1777.79140         | 0.6         |
| b18               | 1874.84517          | 1874.84436         | 0.4         |
| b19               | 1988.88810          | 1988.88696         | 0.6         |
| b21 <sup>2+</sup> | 1087.48770          | 1087.48698         | 0.7         |
| y5                | 544.23617           | 544.23597          | 0.4         |
| y6                | 659.26311           | 659.26297          | 0.2         |
| y7                | 774.29005           | 774.28971          | 0.4         |
| y8                | 888.33298           | 888.33240          | 0.7         |
| y9                | 1001.41704          | 1001.41587         | 1.2         |
| y10               | 1148.48546          | 1148.48490         | 0.5         |
| y11               | 1263.51240          | 1263.51166         | 0.6         |
| y12               | 1334.54951          | 1334.54890         | 0.5         |
| y13               | 1435.59719          | 1435.59692         | 0.2         |
| y14               | 1566.63768          | 1566.63757         | 0.1         |
| y15               | 1669.64686          | 1669.65699         | 6.1         |
| y16               | 1740.68398          | 1740.69794         | 8.0         |
| y17               | 1887.75239          | 1887.75140         | 0.5         |

**Table S5vi: Tandem MS assignments.** Mass values assigned to the cyclodehydration products with calculated and observed values and associated error.

**BmbC-D7N + BmbD:**

| Species | Predicted mass (Da) | Observed mass (Da) | Error (ppm) |
|---------|---------------------|--------------------|-------------|
| b4      | 353.21833           | 353.21823          | 0.3         |
| b5      | 452.28675           | 452.28664          | 0.2         |
| b6      | 599.35516           | 599.35510          | 0.1         |
| b9      | 929.43719           | 929.43697          | 0.2         |
| b10     | 1030.48487          | 1030.48410         | 0.7         |
| b11     | 1101.52198          | 1101.52049         | 1.4         |
| b12     | 1216.54893          | 1216.54781         | 0.9         |
| b13     | 1363.61734          | 1363.61640         | 0.7         |
| b14     | 1476.70140          | 1476.70107         | 0.2         |
| b15     | 1590.74433          | 1590.74371         | 0.4         |
| b16     | 1705.77128          | 1705.77066         | 0.4         |
| b17     | 1820.79822          | 1820.79851         | 0.2         |
| y5      | 544.23617           | 544.23613          | 0.1         |
| y6      | 659.26311           | 659.26301          | 0.2         |
| y7      | 774.29005           | 774.28952          | 0.7         |
| y8      | 888.33298           | 888.33265          | 0.4         |
| y9      | 1001.41704          | 1001.41590         | 1.1         |
| y10     | 1148.48546          | 1148.48602         | 0.5         |
| y11     | 1263.51240          | 1263.51190         | 0.4         |
| y12     | 1334.54951          | 1334.54917         | 0.3         |
| y13     | 1435.59719          | 1435.59687         | 0.2         |
| y14     | 1566.63768          | 1566.63791         | 0.1         |
| y16     | 1765.67923          | 1765.68169         | 1.4         |
| y17     | 1912.74764          | 1912.74756         | 0.0         |



**Table S5vii: Tandem MS assignments.** Mass values assigned to the cyclodehydration products with calculated and observed values and associated error.

**BmbC-D7N + BmbE:**

| <b>Species</b> | <b>Predicted mass (Da)</b> | <b>Observed mass (Da)</b> | <b>Error (ppm)</b> |
|----------------|----------------------------|---------------------------|--------------------|
| b5             | 434.27618                  | 434.27593                 | 0.6                |
| b6             | 581.34460                  | 581.34425                 | 0.6                |
| b8             | 798.39671                  | 798.39663                 | 0.1                |
| b9             | 929.43719                  | 929.43666                 | 0.6                |
| b10            | 1030.48487                 | 1030.48428                | 0.6                |
| b11            | 1101.52198                 | 1101.52143                | 0.5                |
| b12            | 1216.54893                 | 1216.54810                | 0.7                |
| b13            | 1363.61734                 | 1363.61660                | 0.5                |
| b14            | 1476.70140                 | 1476.70055                | 0.6                |
| b15            | 1590.74433                 | 1590.74334                | 0.6                |
| b16            | 1705.77128                 | 1705.77012                | 0.7                |
| b17            | 1820.79822                 | 1820.79712                | 0.6                |
| y5             | 544.23617                  | 544.23591                 | 0.5                |
| y6             | 659.26311                  | 659.26294                 | 0.3                |
| y7             | 774.29005                  | 774.28964                 | 0.5                |
| y8             | 888.33298                  | 888.33250                 | 0.5                |
| y9             | 1001.41704                 | 1001.41609                | 0.9                |
| y10            | 1148.48546                 | 1148.48458                | 0.8                |
| y11            | 1263.51240                 | 1263.51164                | 0.6                |
| y12            | 1334.54951                 | 1334.54884                | 0.5                |
| y13            | 1435.59719                 | 1435.59649                | 0.5                |
| y14            | 1566.63768                 | 1566.63714                | 0.3                |
| y15            | 1669.64686                 | 1669.64551                | 0.8                |
| y16            | 1783.68979                 | 1783.70364                | 7.8                |
| y17            | 1930.75820                 | 1930.75686                | 0.7                |

**Table S5viii: Tandem MS assignments.** Mass values assigned to the cyclodehydration products with calculated and observed values and associated error.

**BmbC-D7T + BmbD:**

| Species                | Predicted mass (Da) | Observed mass (Da) | Error (ppm) |
|------------------------|---------------------|--------------------|-------------|
| b4                     | 353.21833           | 353.21815          | 0.5         |
| b5                     | 452.28675           | 452.28662          | 0.3         |
| b6                     | 599.35516           | 599.35509          | 0.1         |
| [b9-H <sub>2</sub> O]  | 898.43138           | 898.43046          | 1.0         |
| [b10-H <sub>2</sub> O] | 999.47906           | 999.47862          | 0.4         |
| [b11-H <sub>2</sub> O] | 1070.51617          | 1070.51565         | 0.5         |
| [b12-H <sub>2</sub> O] | 1185.54311          | 1185.54266         | 0.4         |
| [b13-H <sub>2</sub> O] | 1332.61153          | 1332.61058         | 0.7         |
| [b14-H <sub>2</sub> O] | 1445.69559          | 1445.69514         | 0.3         |
| [b15-H <sub>2</sub> O] | 1559.73852          | 1559.73833         | 0.1         |
| [b16-H <sub>2</sub> O] | 1674.76546          | 1674.76549         | 0.0         |
| [b17-H <sub>2</sub> O] | 1789.79240          | 1789.79228         | 0.1         |
| y5                     | 544.23617           | 544.23611          | 0.1         |
| y6                     | 659.26311           | 659.26308          | 0.0         |
| y7                     | 774.29005           | 774.28995          | 0.1         |
| y8                     | 888.33298           | 888.33266          | 0.4         |
| y9                     | 1001.41704          | 1001.41649         | 0.5         |
| y10                    | 1148.48546          | 1148.48599         | 0.5         |
| y11                    | 1263.51240          | 1263.51185         | 0.4         |
| y12                    | 1334.54951          | 1334.54919         | 0.2         |
| y13                    | 1435.59719          | 1435.59686         | 0.2         |
| y14                    | 1566.63768          | 1566.63821         | 0.3         |
| [y16-H <sub>2</sub> O] | 1734.67342          | 1734.67362         | 0.1         |
| [y17-H <sub>2</sub> O] | 1881.74183          | 1881.74071         | 0.6         |
| [y18-H <sub>2</sub> O] | 1980.81024          | 1980.80978         | 0.2         |

**Table S5ix: Tandem MS assignments.** Mass values assigned to the cyclodehydration products with calculated and observed values and associated error.

**BmbC-D7T BmbE:**

| Species           | Predicted mass (Da) | Observed mass (Da) | Error (ppm) |
|-------------------|---------------------|--------------------|-------------|
| b5                | 434.27618           | 434.27594          | 0.6         |
| b6                | 581.34460           | 581.34424          | 0.6         |
| b7                | 682.39227           | 682.39221          | 0.1         |
| b8                | 785.40146           | 785.40131          | 0.2         |
| b9                | 916.44194           | 916.44147          | 0.5         |
| b10               | 1017.48962          | 1017.48914         | 0.5         |
| b11               | 1088.52673          | 1088.52612         | 0.6         |
| b12               | 1203.55368          | 1203.55298         | 0.6         |
| b13               | 1350.62209          | 1350.62146         | 0.5         |
| b14               | 1463.70616          | 1463.70559         | 0.4         |
| b15               | 1577.74908          | 1577.74878         | 0.2         |
| b16               | 1692.77603          | 1692.77551         | 0.3         |
| b17               | 1807.80297          | 1807.80237         | 0.3         |
| b21 <sup>2+</sup> | 1102.49299          | 1102.49255         | 0.4         |
| y5                | 544.23617           | 544.23596          | 0.4         |
| y6                | 659.26311           | 659.26288          | 0.3         |
| y7                | 774.29005           | 774.28979          | 0.3         |
| y8                | 888.33298           | 888.33264          | 0.4         |
| y9                | 1001.41704          | 1001.41614         | 0.9         |
| y10               | 1148.48546          | 1148.48584         | 0.3         |
| y11               | 1263.51240          | 1263.51196         | 0.3         |
| y12               | 1334.54951          | 1334.54895         | 0.4         |
| y13               | 1435.59719          | 1435.59680         | 0.3         |
| y14               | 1566.63768          | 1566.63696         | 0.5         |
| y15               | 1669.64686          | 1669.64612         | 0.4         |
| y16               | 1770.69454          | 1770.70911         | 8.2         |
| y17               | 1917.76295          | 1917.76208         | 0.5         |

**Table S5x: Tandem MS assignments.** Mass values assigned to the cyclodehydration products with calculated and observed values and associated error.

**BmbC-AP2 + BmbD:**

| Species | Predicted mass (Da) | Observed mass (Da) | Error (ppm) |
|---------|---------------------|--------------------|-------------|
| b4      | 355.23398           | 355.23377          | 0.6         |
| b5      | 502.30240           | 502.30223          | 0.3         |
| b8      | 833.36844           | 833.36789          | 0.7         |
| b9      | 934.41612           | 934.41487          | 1.3         |
| b10     | 1005.45324          | 1005.45210         | 1.1         |
| b11     | 1120.48018          | 1120.47874         | 1.3         |
| b12     | 1267.54859          | 1267.54820         | 0.3         |
| b13     | 1380.63266          | 1380.63127         | 1.0         |
| b14     | 1494.67558          | 1494.67542         | 0.1         |
| b15     | 1609.70253          | 1609.70232         | 0.1         |
| b16     | 1724.72947          | 1724.72922         | 0.1         |
| b18     | 1935.82516          | 1935.82460         | 0.3         |
| y5      | 544.23617           | 544.23597          | 0.4         |
| y6 (?)  | 659.26311           | 659.28690          | 36.1        |
| y7      | 774.29005           | 774.28979          | 0.3         |
| y8      | 888.33298           | 888.33228          | 0.8         |
| y9      | 1001.41704          | 1001.41427         | 2.8         |
| y10     | 1148.48546          | 1148.48429         | 1.0         |
| y11     | 1263.51240          | 1263.51153         | 0.7         |
| y12     | 1334.54951          | 1334.54905         | 0.3         |
| y13     | 1435.59719          | 1435.59671         | 0.3         |
| y16     | 1766.66324          | 1766.66769         | 2.5         |
| y17     | 1913.73165          | 1913.73074         | 0.5         |

**Table S5xi: Tandem MS assignments.** Mass values assigned to the cyclodehydration products with calculated and observed values and associated error.

**BmbC-P2G + BmbD:**

| Species           | Predicted mass (Da) | Observed mass (Da) | Error (ppm) |
|-------------------|---------------------|--------------------|-------------|
| b5                | 412.25545           | 412.25519          | 0.6         |
| b6                | 559.32386           | 559.32355          | 0.6         |
| b9                | 890.38991           | 890.38904          | 1.0         |
| b10               | 991.43759           | 991.43689          | 0.7         |
| b11               | 1062.47470          | 1062.47339         | 1.2         |
| b12               | 1177.50164          | 1177.50049         | 1.0         |
| b13               | 1324.57006          | 1324.56921         | 0.6         |
| b14               | 1437.65420          | 1437.65344         | 0.5         |
| b15               | 1551.69705          | 1551.69653         | 0.3         |
| b16               | 1666.72399          | 1666.72339         | 0.4         |
| b17               | 1781.75093          | 1781.75024         | 0.4         |
| b21 <sup>2+</sup> | 1089.46697          | 1089.46643         | 0.5         |
| y5                | 544.23614           | 544.23590          | 0.4         |
| y6                | 659.26311           | 659.26282          | 0.4         |
| y7                | 774.29005           | 774.28986          | 0.2         |
| y8                | 888.33298           | 888.33258          | 0.5         |
| y9                | 1001.41704          | 1001.41449         | 2.5         |
| y10               | 1148.48546          | 1148.48523         | 0.2         |
| y11               | 1263.51240          | 1263.51208         | 0.3         |
| y12               | 1334.54951          | 1334.54883         | 0.5         |
| y13               | 1435.59719          | 1435.59668         | 0.4         |
| y16               | 1766.66324          | 1766.66565         | 1.4         |
| y17               | 1913.73165          | 1913.73059         | 0.6         |

**Table S5xii: Tandem MS assignments.** Mass values assigned to the cyclodehydration products with calculated and observed values and associated error.

**BmbC-P2G + BmbE:**

| Species           | Predicted mass (Da) | Observed mass (Da) | Error (ppm) |
|-------------------|---------------------|--------------------|-------------|
| b5                | 394.24488           | 394.24457          | 0.8         |
| b7                | 656.34024           | 656.34011          | 0.2         |
| b8                | 759.34942           | 759.34917          | 0.3         |
| b9                | 890.38991           | 890.38948          | 0.5         |
| b10               | 991.43759           | 991.43736          | 0.2         |
| b11               | 1062.47470          | 1062.47420         | 0.5         |
| b12               | 1177.50164          | 1177.50096         | 0.6         |
| b13               | 1324.57006          | 1324.56928         | 0.6         |
| b14               | 1437.65412          | 1437.65383         | 0.2         |
| b15               | 1551.69708          | 1551.69636         | 0.5         |
| b16               | 1666.72399          | 1666.72312         | 0.5         |
| b17               | 1781.75093          | 1781.75059         | 0.2         |
| b19               | 1992.84662          | 1992.84525         | 0.7         |
| b21 <sup>2+</sup> | 1089.46697          | 1089.46669         | 0.3         |
| y5                | 544.23617           | 544.23604          | 0.2         |
| y6                | 659.26311           | 659.26301          | 0.2         |
| y7                | 774.29005           | 774.28983          | 0.3         |
| y8                | 888.33298           | 888.33259          | 0.4         |
| y9                | 1001.41704          | 1001.41584         | 1.2         |
| y10               | 1148.48546          | 1148.48496         | 0.4         |
| y11               | 1263.51240          | 1263.51182         | 0.5         |
| y12               | 1334.54951          | 1334.54893         | 0.4         |
| y13               | 1435.59719          | 1435.59659         | 0.4         |
| y14               | 1566.63768          | 1566.63664         | 0.7         |
| y15               | 1669.64686          | 1669.64613         | 0.4         |
| y16               | 1784.67381          | 1784.68814         | 8.0         |
| y17               | 1931.74222          | 1931.74063         | 0.8         |

**Table S5xiii: Tandem MS assignments.** Mass values assigned to the cyclodehydration products with calculated and observed values and associated error.

**BmbC-V5G + BmbE:**

| Species           | Predicted mass (Da) | Observed mass (Da) | Error (ppm) |
|-------------------|---------------------|--------------------|-------------|
| b5                | 392.22923           | 392.22897          | 0.7         |
| b8                | 757.33377           | 757.33364          | 0.2         |
| b9                | 888.37426           | 888.37064          | 4.1         |
| b10               | 989.42194           | 989.42161          | 0.3         |
| b11               | 1060.45905          | 1060.45863         | 0.4         |
| b12               | 1175.48599          | 1175.48527         | 0.6         |
| b13               | 1322.55441          | 1322.55348         | 0.7         |
| b14               | 1435.63847          | 1435.63844         | 0.0         |
| b15               | 1549.68140          | 1549.68114         | 0.2         |
| b16               | 1664.70834          | 1664.70774         | 0.4         |
| b17               | 1779.73582          | 1779.73465         | 0.7         |
| b21 <sup>2+</sup> | 1088.45915          | 1088.45859         | 0.5         |
| y5                | 544.23617           | 544.23601          | 0.3         |
| y6                | 659.26311           | 659.26298          | 0.2         |
| y7                | 774.29005           | 774.28973          | 0.4         |
| y8                | 888.33298           | 888.33248          | 0.6         |
| y9                | 1001.41704          | 1001.41612         | 0.9         |
| y10               | 1148.48546          | 1148.48490         | 0.5         |
| y11               | 1263.51240          | 1263.51162         | 0.6         |
| y12               | 1334.54951          | 1334.54887         | 0.5         |
| y14               | 1435.59719          | 1435.59628         | 0.6         |
| y15               | 1566.63768          | 1566.63754         | 0.1         |
| y16               | 1669.64686          | 1669.64601         | 0.5         |
| y17               | 1784.67381          | 1784.68254         | 4.9         |

**Table S5xiv: Tandem MS assignments.** Mass values assigned to the cyclodehydration products with calculated and observed values and associated error.

**BmbC-V5L + BmbD:**

| <b>Species</b> | <b>Predicted mass (Da)</b> | <b>Observed mass (Da)</b> | <b>Error (ppm)</b> |
|----------------|----------------------------|---------------------------|--------------------|
| b5             | 466.30240                  | 466.30226                 | 0.3                |
| b6             | 613.37081                  | 613.37060                 | 0.3                |
| b9             | 944.43686                  | 944.43649                 | 0.4                |
| b10            | 1045.48454                 | 1045.48432                | 0.2                |
| b11            | 1116.52165                 | 1116.52200                | 0.3                |
| b12            | 1231.54859                 | 1231.54868                | 0.1                |
| b13            | 1378.61701                 | 1378.61667                | 0.2                |
| b14            | 1491.70107                 | 1491.70063                | 0.3                |
| b15            | 1605.74400                 | 1605.74297                | 0.6                |
| b16            | 1720.77094                 | 1720.76939                | 0.9                |
| b17            | 1835.79788                 | 1835.79882                | 0.5                |
| y5             | 544.23617                  | 544.23609                 | 0.1                |
| y6             | 659.26311                  | 659.26312                 | 0.0                |
| y7             | 774.29005                  | 774.28988                 | 0.2                |
| y8             | 888.33298                  | 888.33267                 | 0.3                |
| y9             | 1001.41704                 | 1001.41628                | 0.8                |
| y10            | 1148.48546                 | 1148.48644                | 0.9                |
| y11            | 1263.51240                 | 1263.51186                | 0.4                |
| y12            | 1334.54951                 | 1334.54901                | 0.4                |
| y13            | 1435.59719                 | 1435.59739                | 0.1                |
| y16            | 1766.66324                 | 1766.66739                | 2.3                |
| y17            | 1913.73165                 | 1913.73284                | 0.6                |



**Table S5xv: Tandem MS assignments.** Mass values assigned to the cyclodehydration products with calculated and observed values and associated error.

**BmbC-V5L + BmbE:**

| Species           | Predicted mass (Da) | Observed mass (Da) | Error (ppm) |
|-------------------|---------------------|--------------------|-------------|
| b5                | 448.29183           | 448.29164          | 0.4         |
| b6                | 595.36025           | 595.35983          | 0.7         |
| b7                | 710.38719           | 710.38693          | 0.4         |
| b8                | 813.39637           | 813.39602          | 0.4         |
| b9                | 944.43686           | 944.43636          | 0.5         |
| b10               | 1045.48454          | 1045.48405         | 0.5         |
| b11               | 1116.52165          | 1116.52168         | 0.0         |
| b12               | 1231.54859          | 1231.54830         | 0.2         |
| b13               | 1378.61701          | 1378.61602         | 0.7         |
| b14               | 1491.70107          | 1491.70041         | 0.4         |
| b15               | 1605.74400          | 1605.74345         | 0.3         |
| b16               | 1720.77094          | 1720.77004         | 0.5         |
| b17               | 1835.79788          | 1835.79707         | 0.4         |
| b21 <sup>2+</sup> | 1116.49045          | 1116.49012         | 0.3         |
| y5                | 544.23617           | 544.23600          | 0.3         |
| y6                | 659.26311           | 659.26296          | 0.2         |
| y7                | 774.29005           | 774.28977          | 0.4         |
| y8                | 888.33298           | 888.33238          | 0.7         |
| y9                | 1001.41704          | 1001.41602         | 1.0         |
| y10               | 1148.48546          | 1148.48518         | 0.2         |
| y11               | 1263.51240          | 1263.51154         | 0.7         |
| y12               | 1334.54951          | 1334.54905         | 0.3         |
| y13               | 1435.59719          | 1435.59658         | 0.4         |
| y14               | 1566.63768          | 1566.63669         | 0.6         |
| y15               | 1669.64686          | 1669.64652         | 0.2         |
| y16               | 1784.67381          | 1784.68874         | 8.4         |
| y17               | 1931.74222          | 1931.74117         | 0.5         |

**Figure S8 (i-x): NMR spectroscopic characterization of cyclodehydration products.** BmbC-N15K unmodified peptide and cyclodehydration products were subjected to trypsin cleavage for NMR analysis.

**Figure S8i: Overlays of BmbC-N15K trypsin-cleaved cyclodehydration products.** (A) COSY spectra of the unmodified bottromycin precursor peptide (black) and the thiazoline-bearing form after treatment of BmbC with BmbD (blue). (B) COSY spectra of the unmodified bottromycin precursor peptide (black) and the macrolactamidine-bearing form after treatment with BmbE (green). Insets highlight the key changes between the spectra.

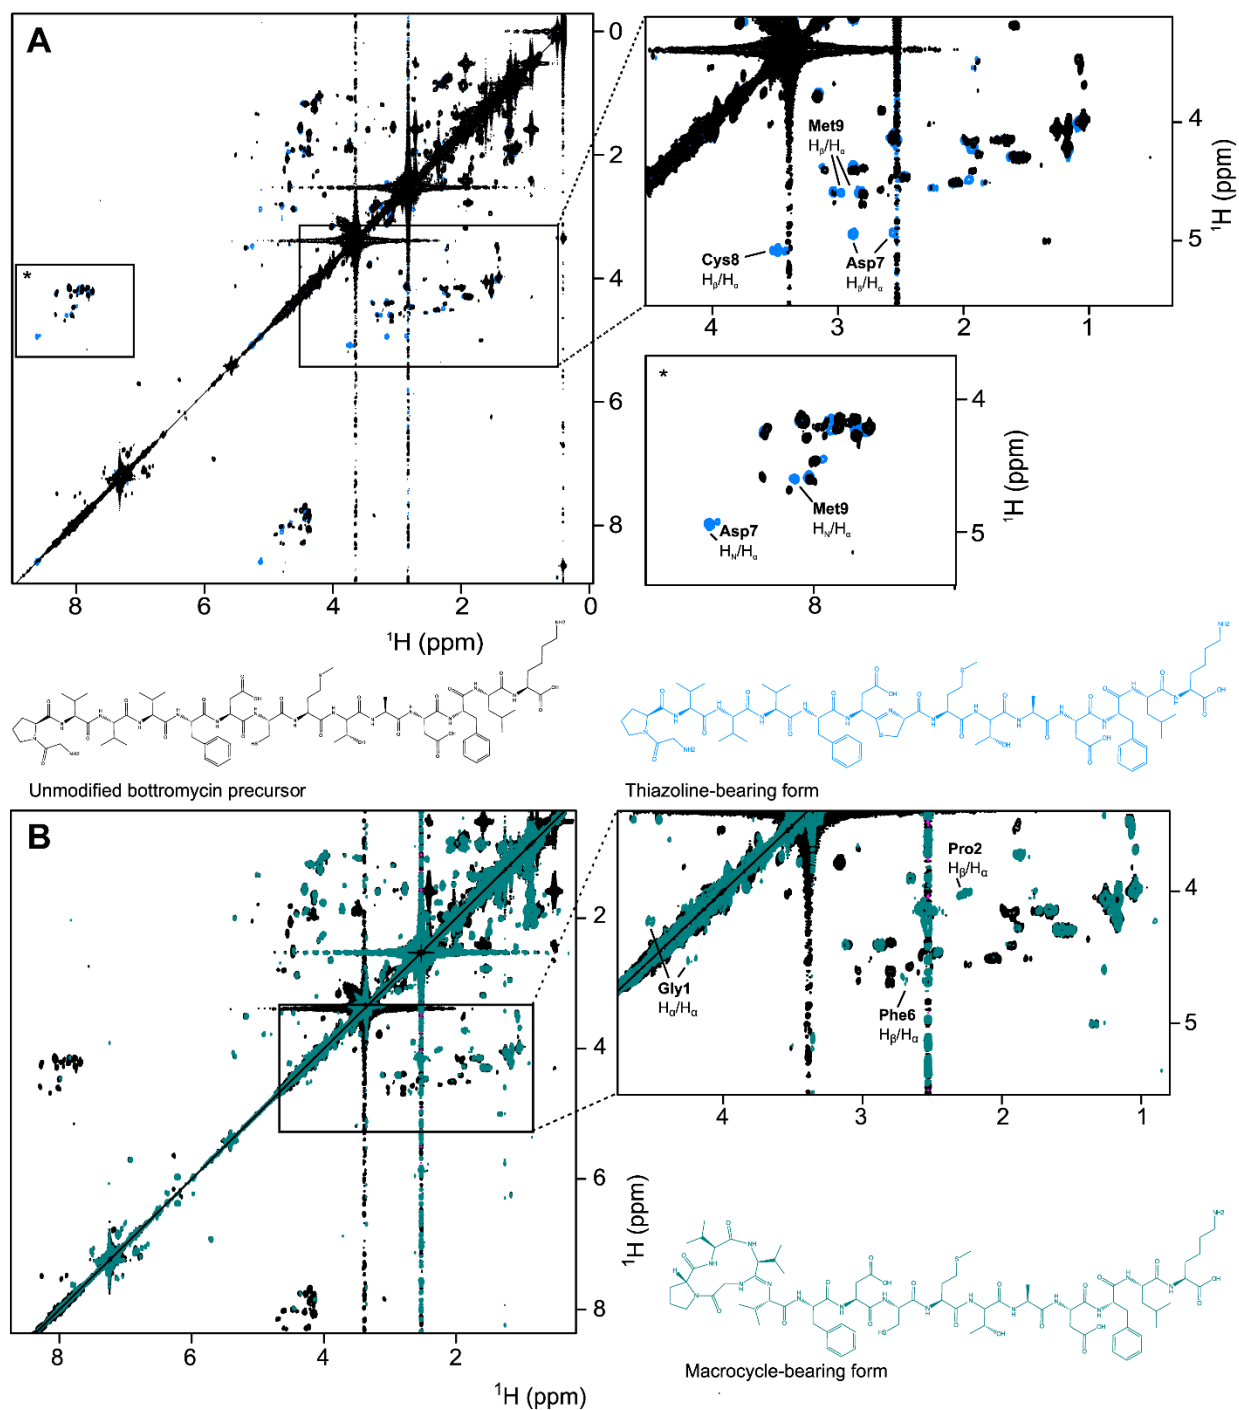

Figure S8ii:  $^1\text{H}$ - $^1\text{H}$  COSY (DMSO- $d_6$ ) of BmbC-N15K-trypsinized

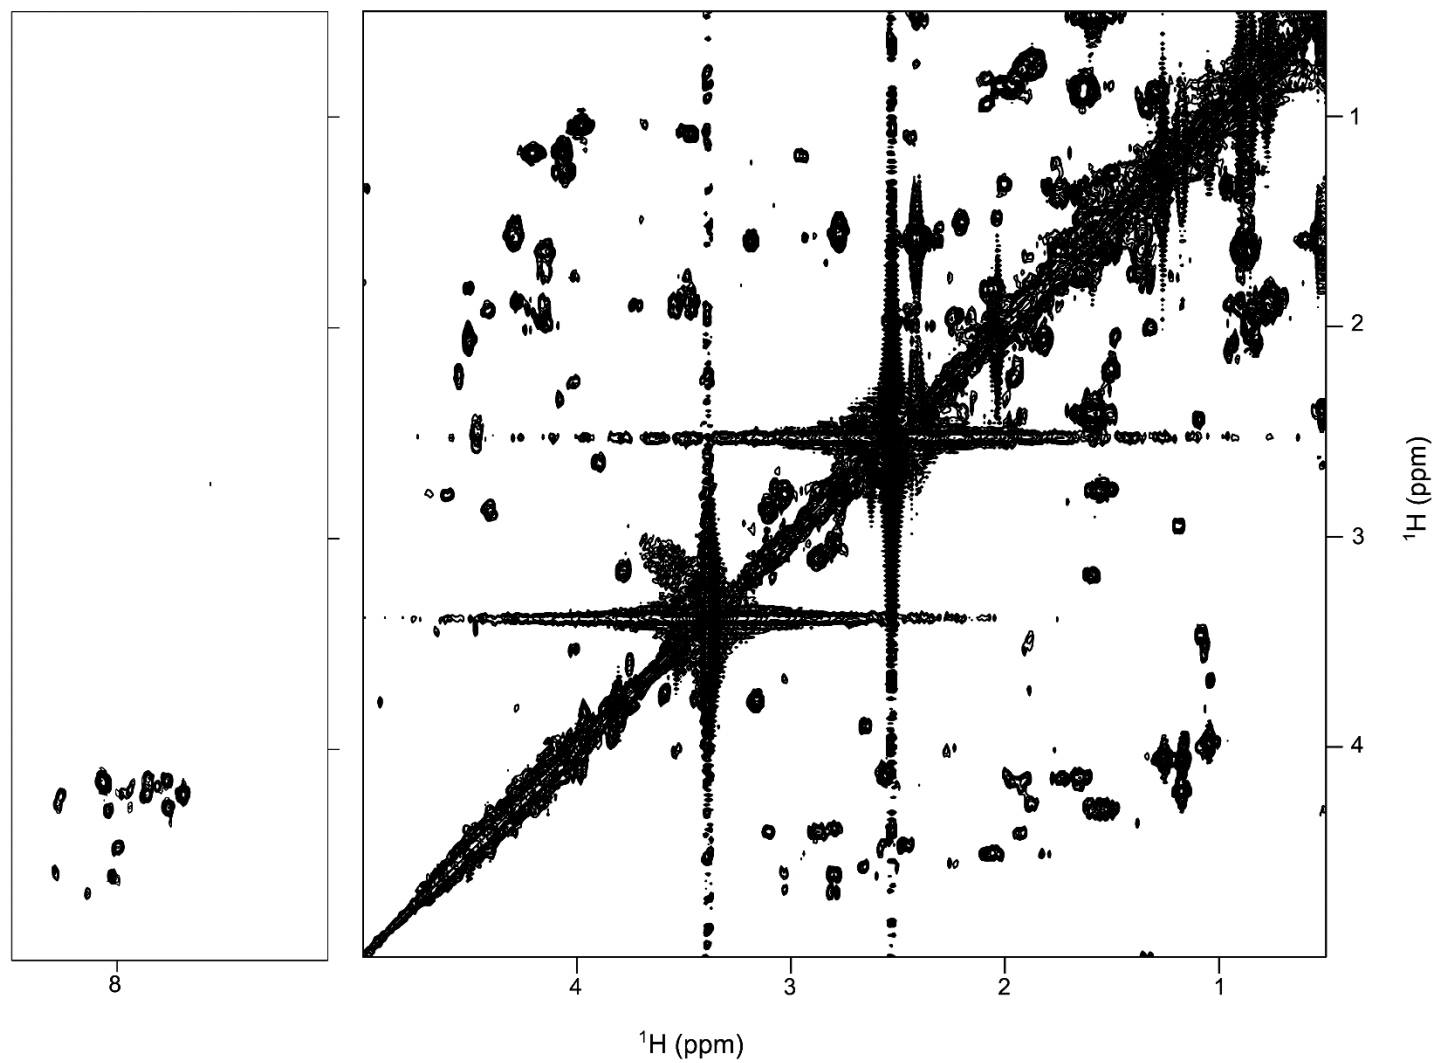

Figure S8iii:  $^1\text{H}$ - $^1\text{H}$  TOCSY (DMSO- $d_6$ ) of BmbC-N15K-trypsinized

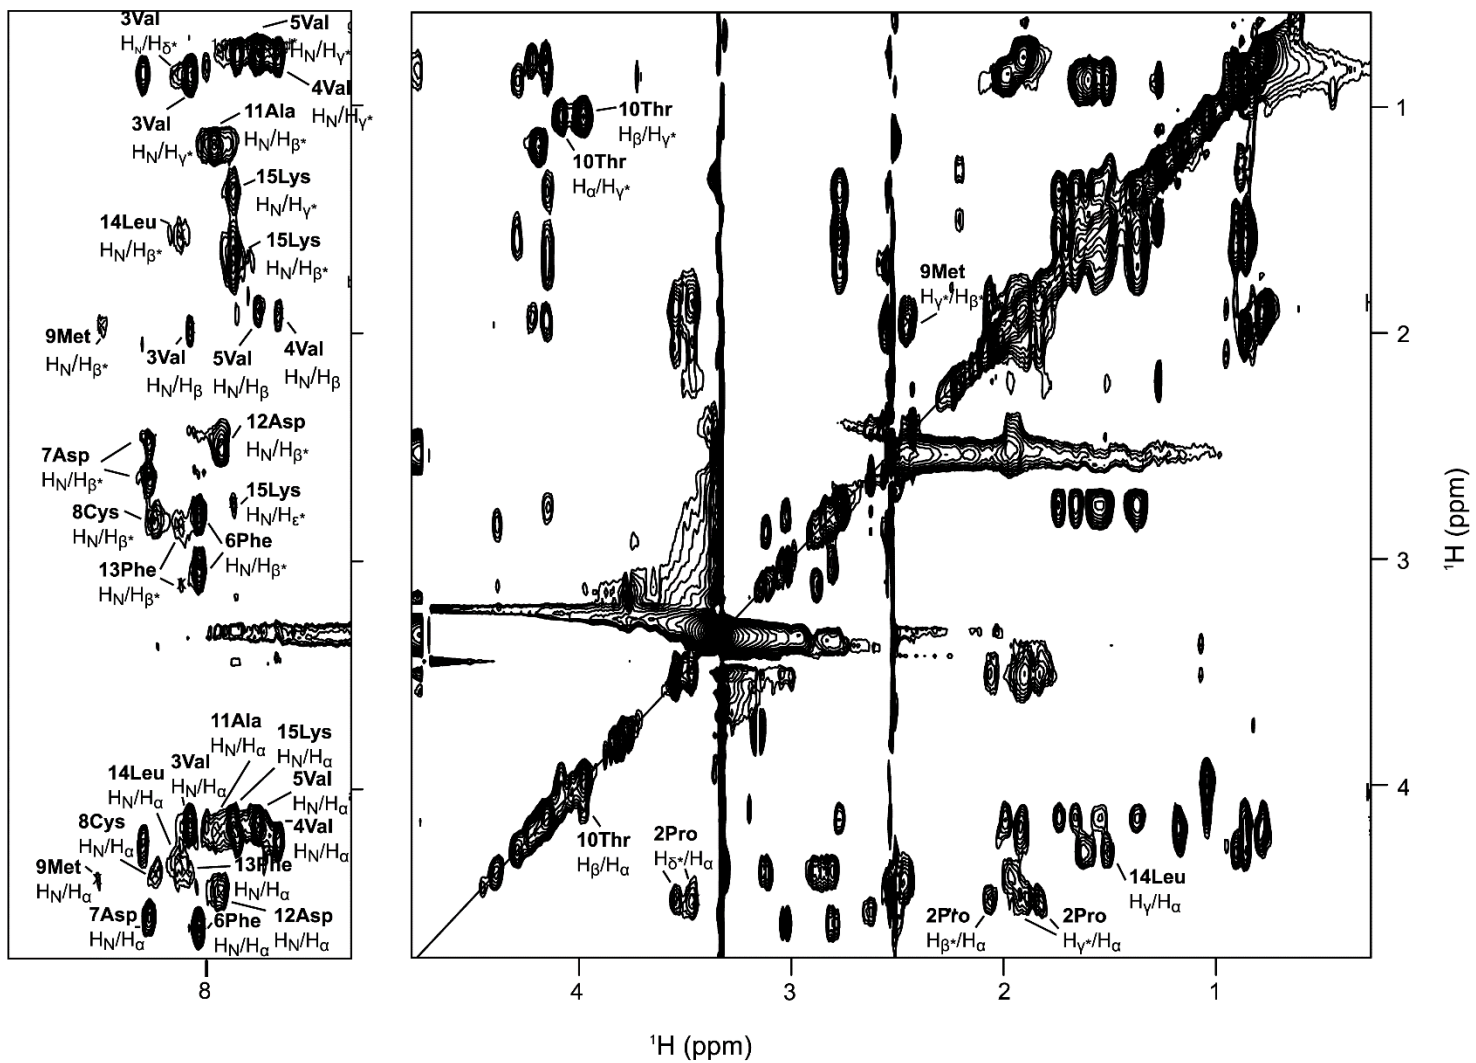

Figure S8iv:  $^1\text{H}$ - $^1\text{H}$  NOESY (DMSO- $d_6$ ) of BmbC-N15K-trypsinized.

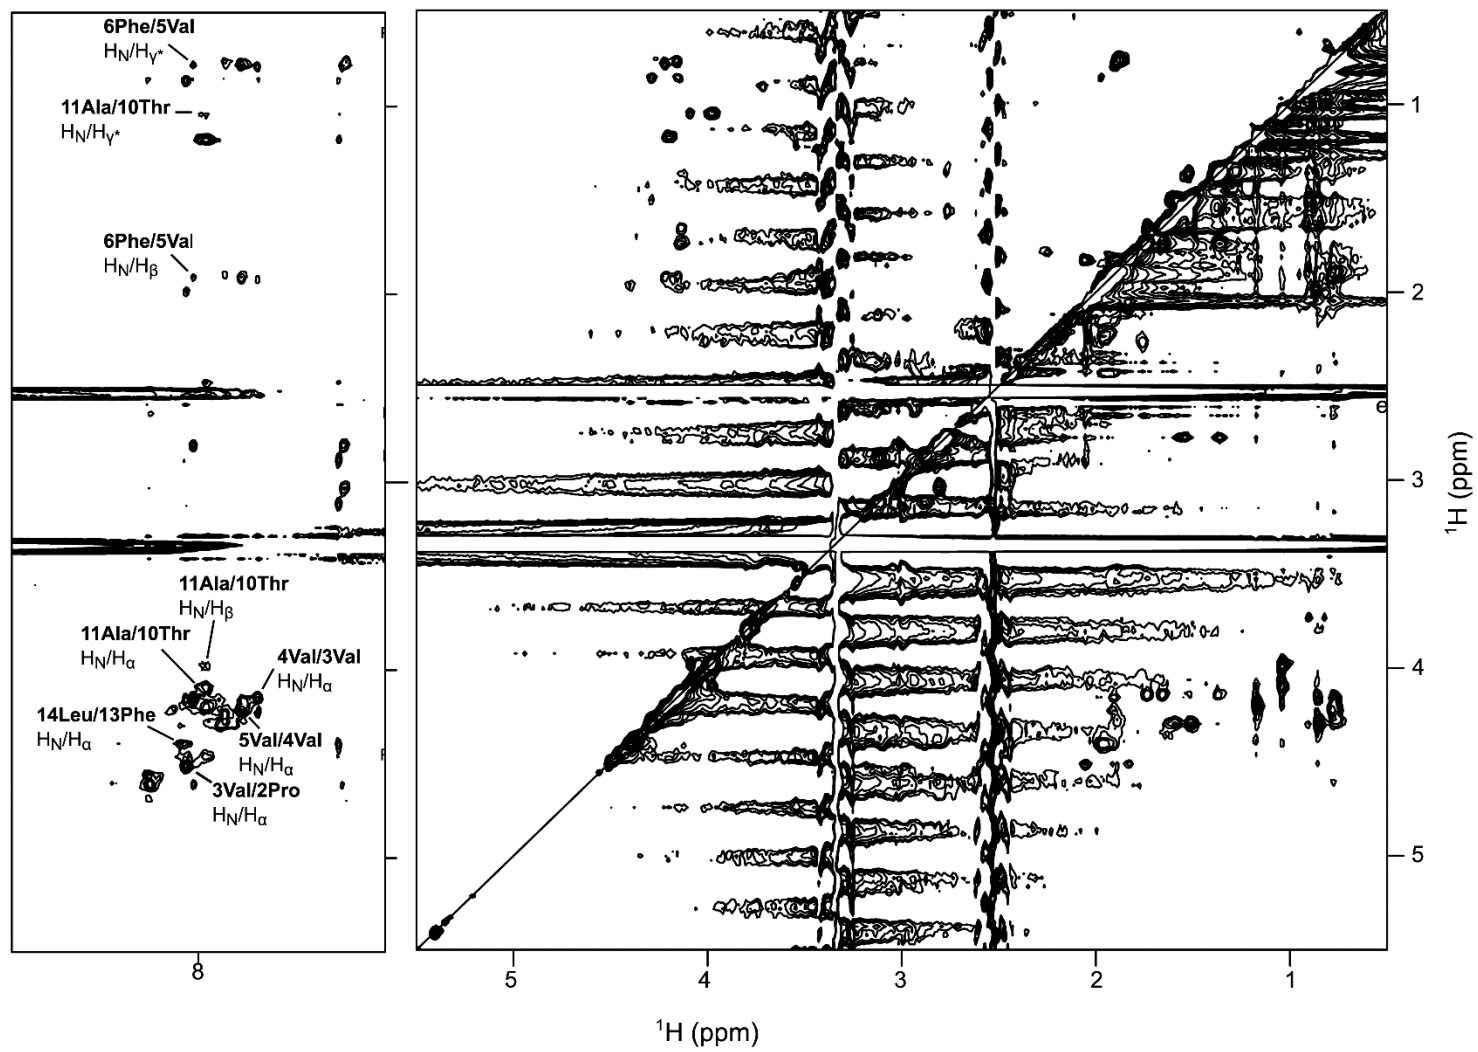

Figure S8v:  $^1\text{H}$ - $^1\text{H}$  COSY (DMSO- $d_6$ ) of BmbC-N15K-trypsinized thiazoline

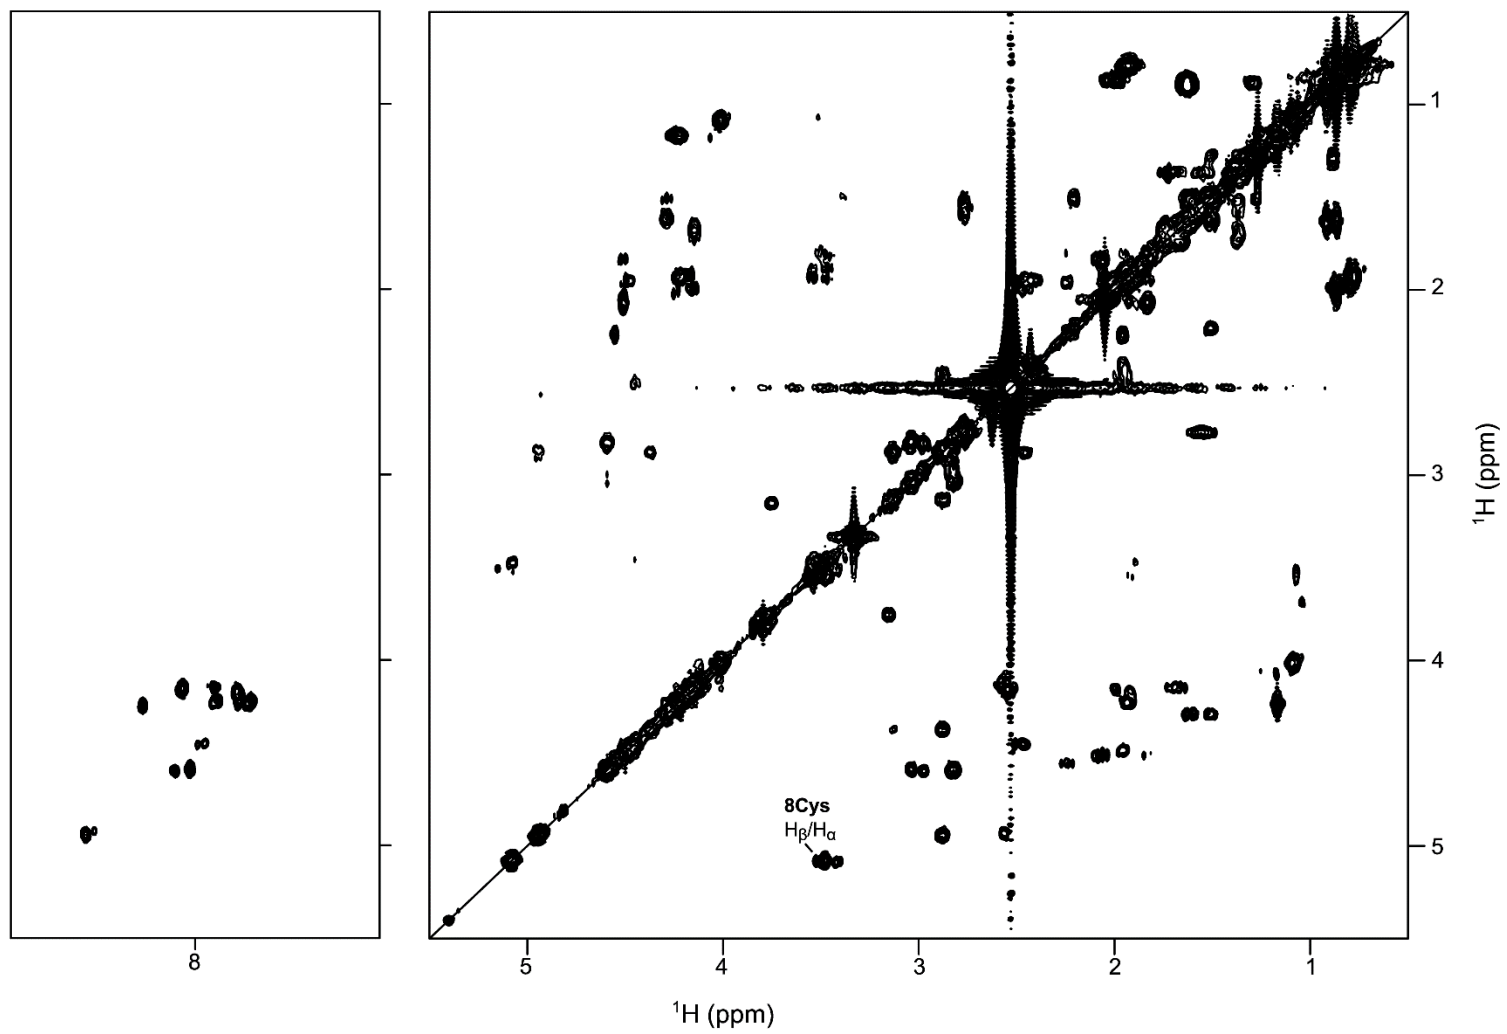

Figure S8vi:  $^1\text{H}$ - $^1\text{H}$  TOCSY (DMSO- $d_6$ ) of BmbC-N15K-trypsinized thiazoline

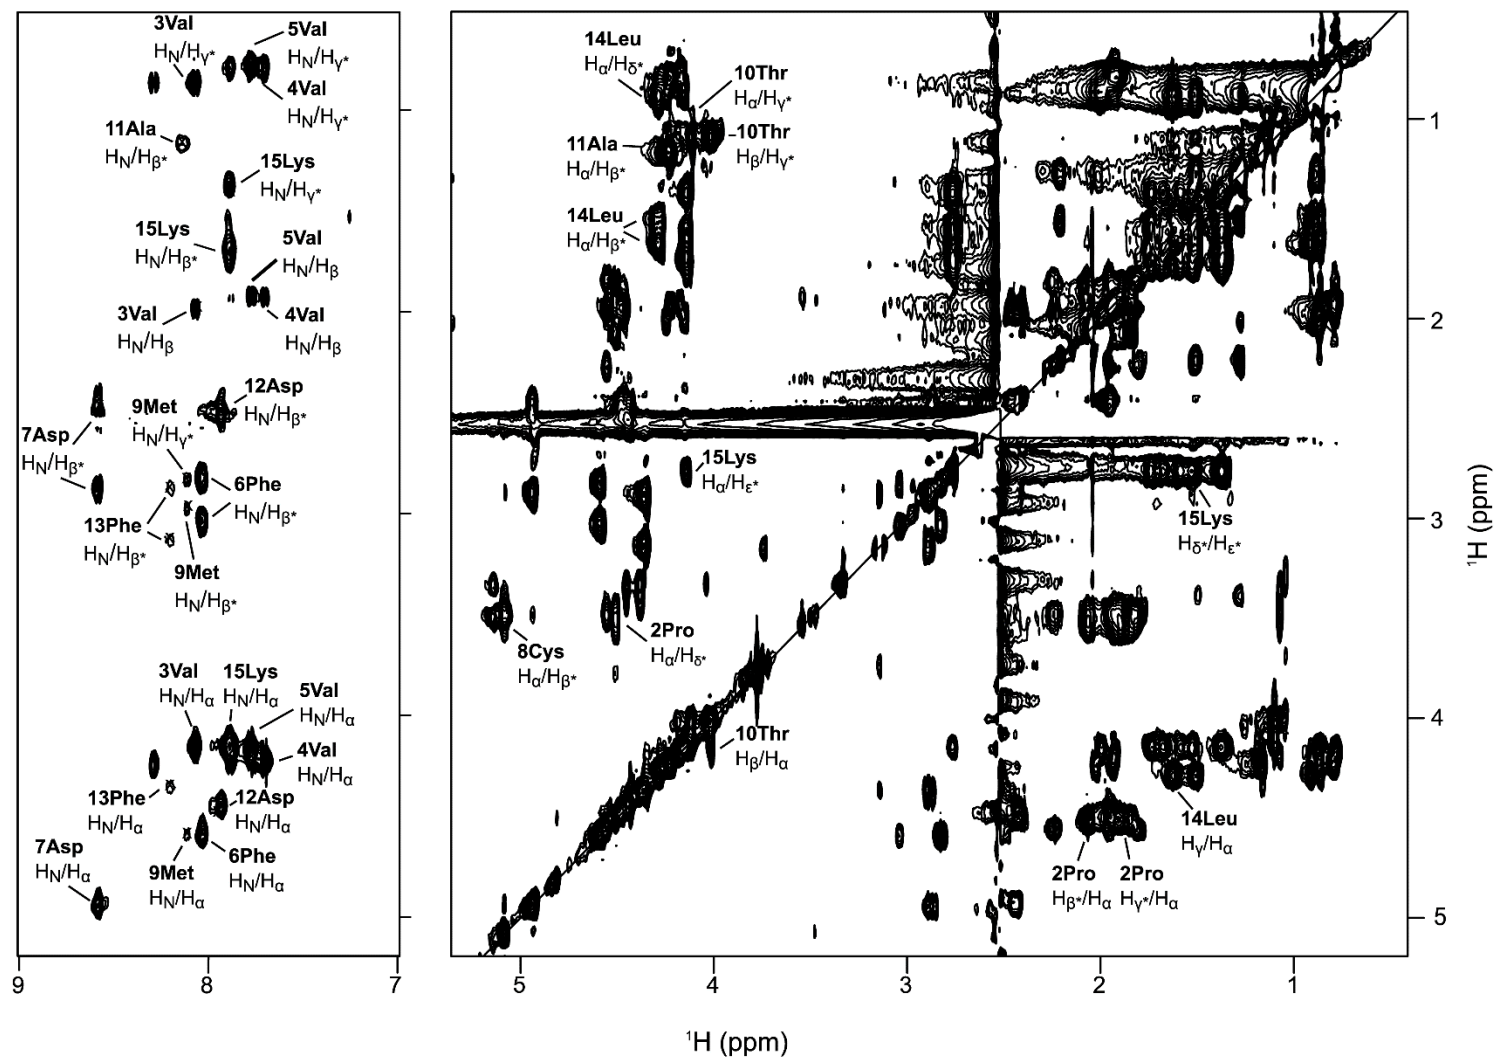

Figure S8vii:  $^1\text{H}$ - $^1\text{H}$  NOESY (DMSO- $d_6$ ) of BmbC-N15K-trypsinized thiazoline

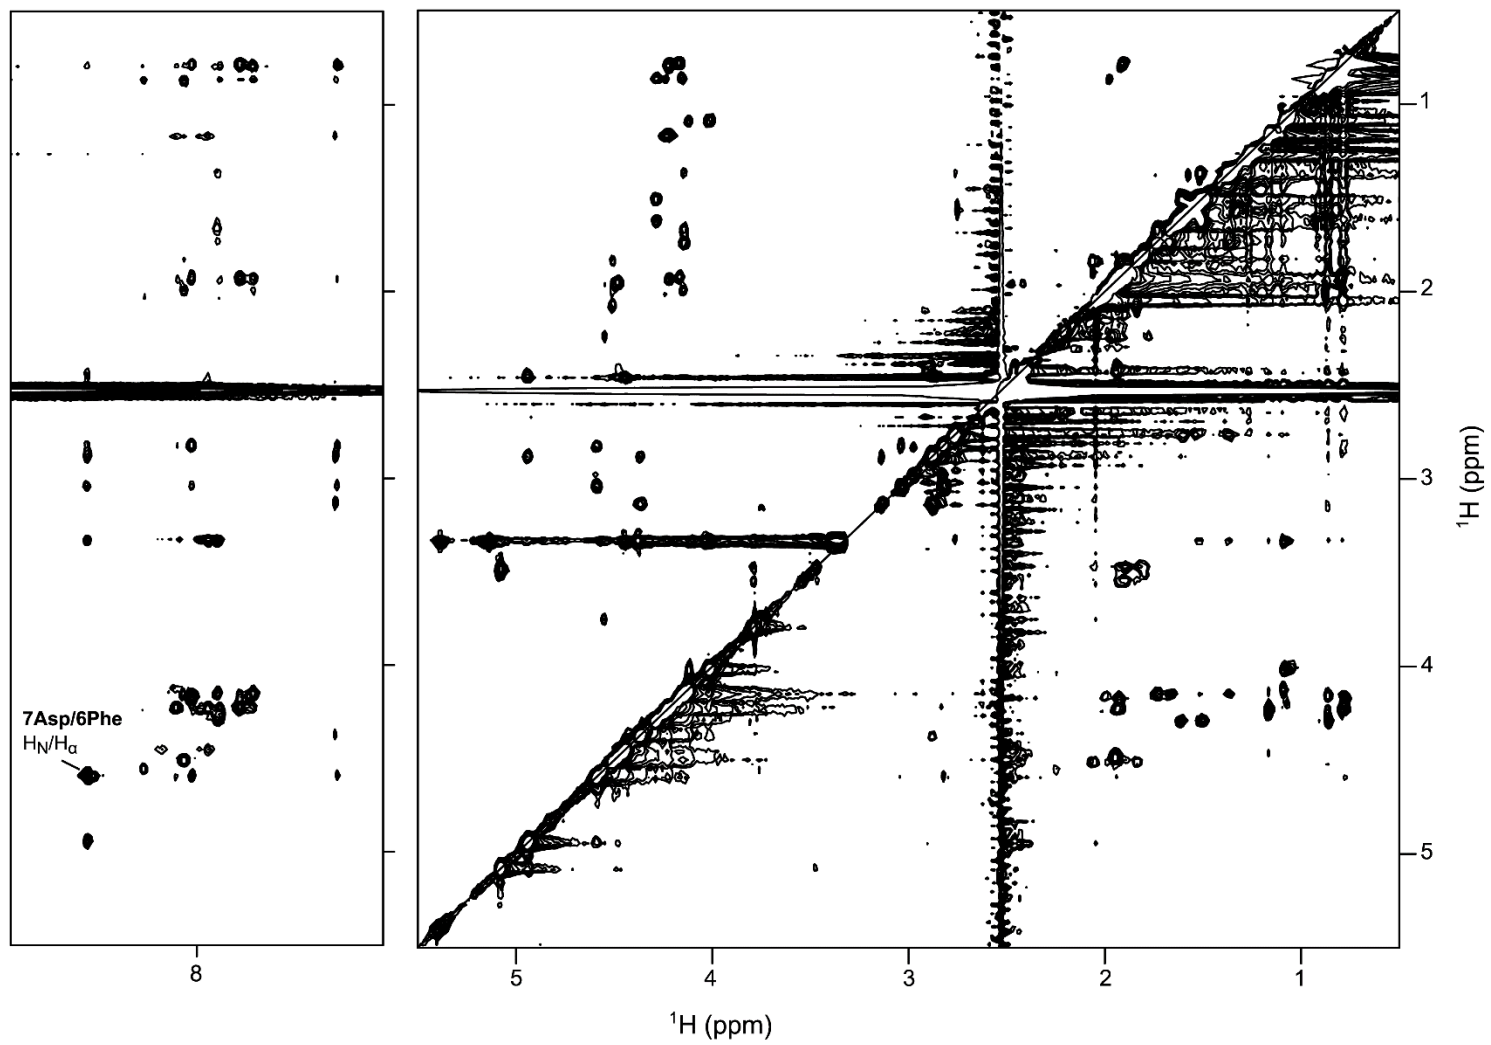



Figure S8viii:  $^1\text{H}$ - $^1\text{H}$  COSY (DMSO- $d_6$ ) of BmbC-N15K-trypsinized macrolactamidine

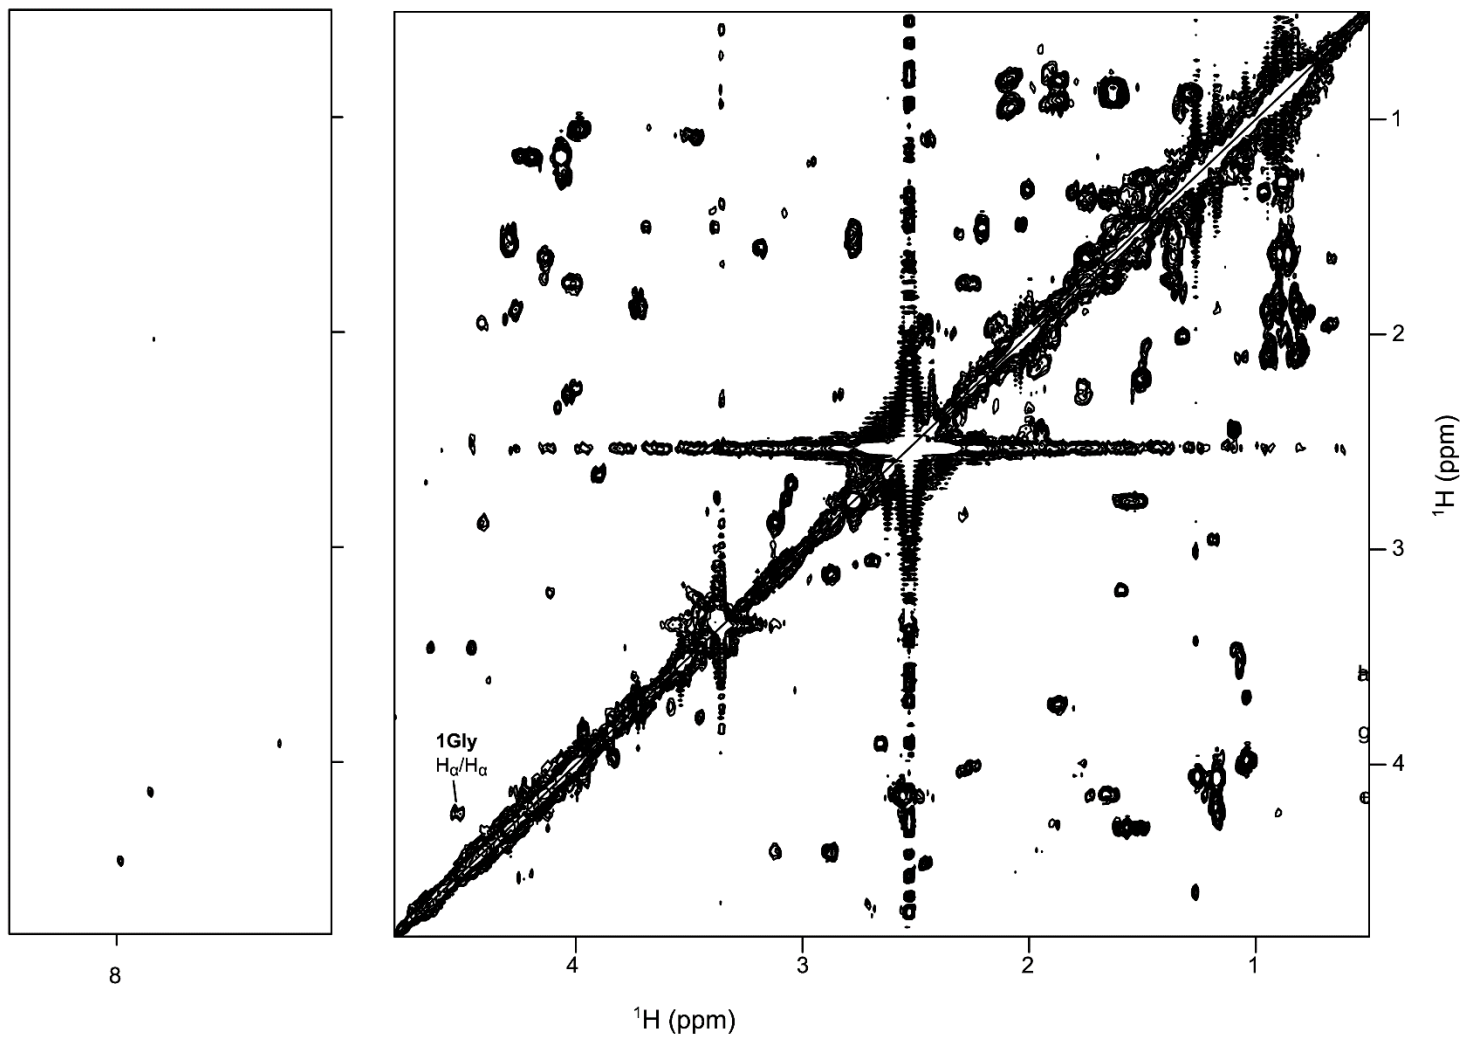

Figure S8ix:  $^1\text{H}$ - $^1\text{H}$  TOCSY (DMSO- $d_6$ ) of BmbC-N15K-trypsinized macrolactamidine

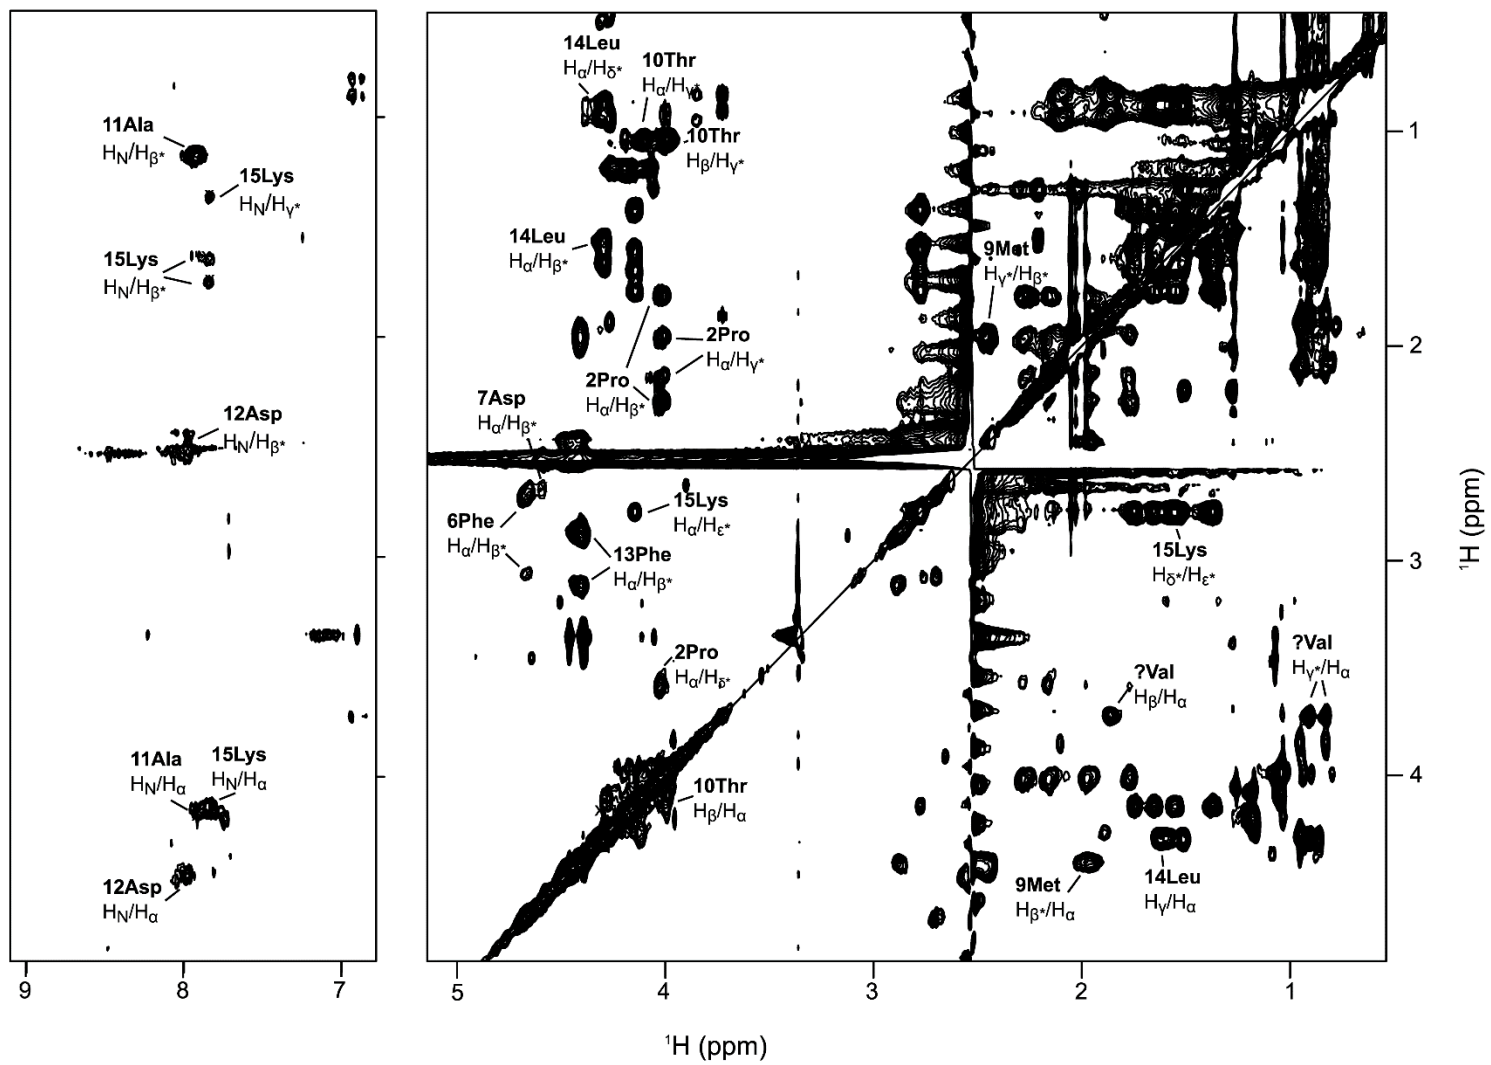

Figure S8x:  $^1\text{H}$ - $^1\text{H}$  NOESY (DMSO- $d_6$ ) of BmbC-N15K-trypsinized macrolactamidine

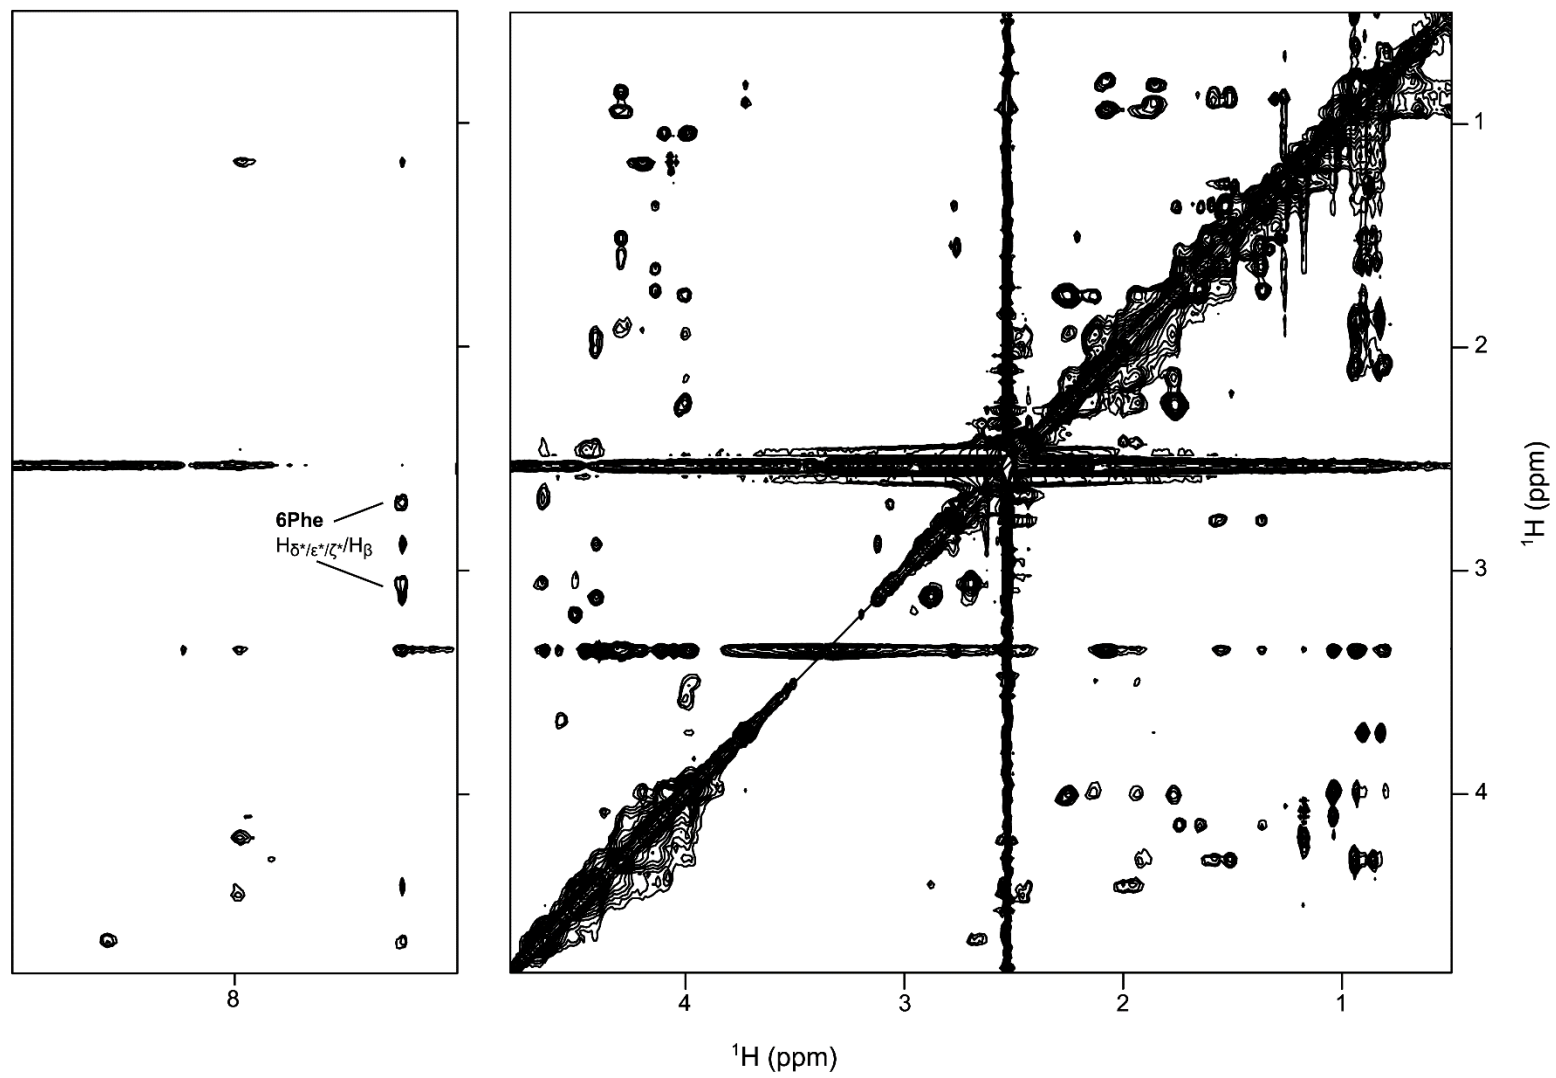

**Table S6: Assignments for signals due to protons in NMR spectra of cyclodehydrated products.** Chemical shift values in ppm are given for the products of the BmbD and BmbE –catalyzed reactions and compared to the corresponding values for the substrate. *na* unambiguous assignment not possible from spectra; \* resonances with the same shift. Protons with different shifts are highlighted in gray.

|       | Proton Shifts Unprocessed $\delta$ (ppm) |                                  |                                 |                                  |                                  |                                    |                                 | Proton Shifts Macrolactamidine $\delta$ (ppm) |                                  |                                 |                                  |                                  |                                    |                                 | Proton Shifts Thiazoline $\delta$ (ppm) |                                  |                                 |                                  |                                  |                                    |                                 |   |
|-------|------------------------------------------|----------------------------------|---------------------------------|----------------------------------|----------------------------------|------------------------------------|---------------------------------|-----------------------------------------------|----------------------------------|---------------------------------|----------------------------------|----------------------------------|------------------------------------|---------------------------------|-----------------------------------------|----------------------------------|---------------------------------|----------------------------------|----------------------------------|------------------------------------|---------------------------------|---|
|       | H <sub>N</sub>                           | H <sub><math>\alpha</math></sub> | H <sub><math>\beta</math></sub> | H <sub><math>\gamma</math></sub> | H <sub><math>\delta</math></sub> | H <sub><math>\epsilon</math></sub> | H <sub><math>\zeta</math></sub> | H <sub>N</sub>                                | H <sub><math>\alpha</math></sub> | H <sub><math>\beta</math></sub> | H <sub><math>\gamma</math></sub> | H <sub><math>\delta</math></sub> | H <sub><math>\epsilon</math></sub> | H <sub><math>\zeta</math></sub> | H <sub>N</sub>                          | H <sub><math>\alpha</math></sub> | H <sub><math>\beta</math></sub> | H <sub><math>\gamma</math></sub> | H <sub><math>\delta</math></sub> | H <sub><math>\epsilon</math></sub> | H <sub><math>\zeta</math></sub> |   |
| Gly1  | <i>na</i>                                | <i>na</i>                        | -                               | -                                | -                                | -                                  | -                               | <i>na</i>                                     | 4.52/4.23                        | -                               | -                                | -                                | -                                  | -                               | <i>na</i>                               | <i>na</i>                        | -                               | -                                | -                                | -                                  | -                               | - |
| Pro2  | -                                        | 4.51                             | 2.06*                           | 1.91*                            | 3.52                             | -                                  | -                               | -                                             | 4.01                             | 2.28/1.76                       | 1.98/2.17                        | 3.58                             | -                                  | -                               | -                                       | 4.51                             | 2.07*                           | 1.91*                            | 3.52                             | -                                  | -                               | - |
| Val3  | 8.07                                     | 4.16                             | 2                               | 0.86*                            | -                                | -                                  | -                               | <i>na</i>                                     | <i>na</i>                        | <i>na</i>                       | <i>na</i>                        | -                                | -                                  | -                               | 8.06                                    | 4.15                             | 1.99                            | 0.86*                            | -                                | -                                  | -                               | - |
| Val4  | 7.69                                     | 4.22                             | 1.92                            | 0.79*                            | -                                | -                                  | -                               | <i>na</i>                                     | <i>na</i>                        | <i>na</i>                       | <i>na</i>                        | -                                | -                                  | -                               | 7.7                                     | 4.22                             | 1.93                            | 0.78*                            | -                                | -                                  | -                               | - |
| Val5  | 7.77                                     | 4.17                             | 1.91                            | 0.78*                            | -                                | -                                  | -                               | <i>na</i>                                     | <i>na</i>                        | <i>na</i>                       | <i>na</i>                        | -                                | -                                  | -                               | 7.77                                    | 4.17                             | 1.93                            | 0.78*                            | -                                | -                                  | -                               | - |
| Phe6  | 8.03                                     | 4.6                              | 3.03/2.81                       | -                                | 7.23*                            | 7.23*                              | 7.23*                           | <i>na</i>                                     | 4.67                             | 3.06/2.70                       | -                                | 7.26*                            | 7.26*                              | 7.26*                           | 8.03                                    | 4.58                             | 3.04/2.82                       | -                                | <i>na</i>                        | <i>na</i>                          | <i>na</i>                       | - |
| Asp7  | 8.26                                     | 4.56                             | 2.48/2.63                       | -                                | -                                | -                                  | -                               | <i>na</i>                                     | 4.59                             | 2.66/2.49                       | -                                | -                                | -                                  | -                               | 8.58                                    | 4.94                             | 2.88/2.46                       | -                                | -                                | -                                  | -                               | - |
| Cys8  | 8.23                                     | 4.39                             | 2.82*                           | -                                | -                                | -                                  | -                               | <i>na</i>                                     | <i>na</i>                        | <i>na</i>                       | -                                | -                                | -                                  | -                               | -                                       | 5.08                             | 3.49/3.42                       | -                                | -                                | -                                  | -                               | - |
| Met9  | 8.46                                     | 4.41                             | 1.96/1.96                       | 2.45*                            | -                                | -                                  | -                               | 8.47                                          | 4.41                             | 1.98*                           | 2.46                             | -                                | -                                  | -                               | 8.11                                    | 4.6                              | 2.97/2.97                       | 2.84*                            | -                                | -                                  | -                               | - |
| Thr10 | 8.22                                     | 4.09                             | 3.98                            | 1.04                             | -                                | -                                  | -                               | 7.74                                          | 4.1                              | 4                               | 1.04                             | -                                | -                                  | -                               | 8.4                                     | 4.13                             | 4.01                            | 1.09                             | -                                | -                                  | -                               | - |
| Ala11 | 7.97                                     | 4.19                             | 1.18                            | -                                | -                                | -                                  | -                               | 7.93                                          | 4.19                             | 1.18                            | -                                | -                                | -                                  | -                               | 8.14                                    | 4.22                             | 1.16                            | -                                | -                                | -                                  | -                               | - |
| Asp12 | 7.94                                     | 4.45                             | 2.48*                           | -                                | -                                | -                                  | -                               | 7.94                                          | 4.42                             | 2.47*                           | -                                | -                                | -                                  | -                               | 7.94                                    | 4.45                             | 2.47*                           | -                                | -                                | -                                  | -                               | - |
| Phe13 | 8.12                                     | 4.39                             | 3.12/2.87                       | -                                | 7.25*                            | 7.25*                              | 7.25*                           | 7.97                                          | 4.41                             | 3.12/2.88                       | -                                | 7.24*                            | 7.24*                              | 7.24*                           | 8.2                                     | 4.35                             | 3.14/2.88                       | -                                | <i>na</i>                        | <i>na</i>                          | <i>na</i>                       | - |
| Leu14 | 8.11                                     | 4.3                              | 1.54*                           | 1.6                              | 0.88*                            | -                                  | -                               | 8.08                                          | 4.29                             | 1.52*                           | 1.62                             | 0.88*                            | -                                  | -                               | 8.26                                    | 4.29                             | 1.62/1.51                       | 1.62                             | 0.91/0.86                        | -                                  | -                               | - |
| Lys15 | 7.88                                     | 4.15                             | 1.70*                           | 1.37*                            | 1.55                             | 2.77*                              | -                               | 7.85                                          | 4.14                             | 1.65/1.74                       | 1.37                             | 1.55*                            | 2.77*                              | -                               | 7.89                                    | 4.15                             | 1.71*                           | 1.37*                            | 1.59                             | 2.76*                              | -                               | - |

**Figure S9: In vitro processing is not enhanced by BmbG or BmbH.** Putative partner proteins BmbG and BmbH were assessed for enhancement of processing by BmbD and BmbE in 16 h endpoint MALDI-TOF-MS assay comparing conversion of the BmbC precursor to the cyclodehydrated species.

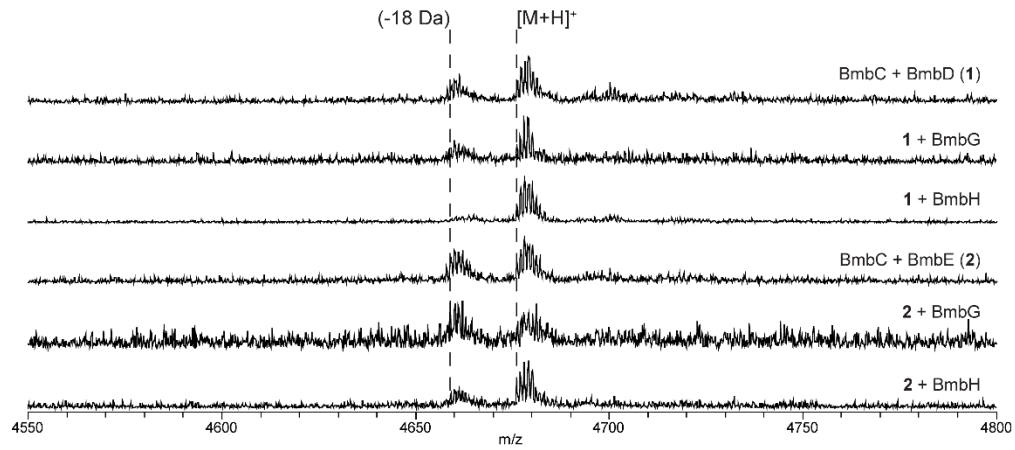

**Figure S10: Minimal follower peptide for bottromycin cyclodehydratase processing.** (A) C-terminal truncations of the bottromycin precursor peptide (BmbC) were prepared by introducing stop codons at evenly spaced intervals. The BmbC core peptide region is shown in green. Truncations tested as in vitro substrates of BmbD and BmbE and labeled below the sequence. Variants which were not processed are labeled in purple. Truncated precursor which was processed and denoted as the minimal follower peptide is labeled in blue. (B) Additional stop codons were installed adjacent to the G35\* variant, indicating an identical minimal follower motif for both bottromycin cyclodehydratases.

**A**

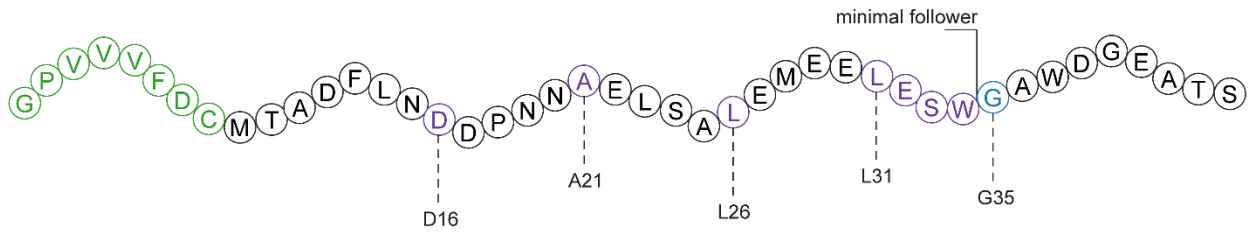

**B**

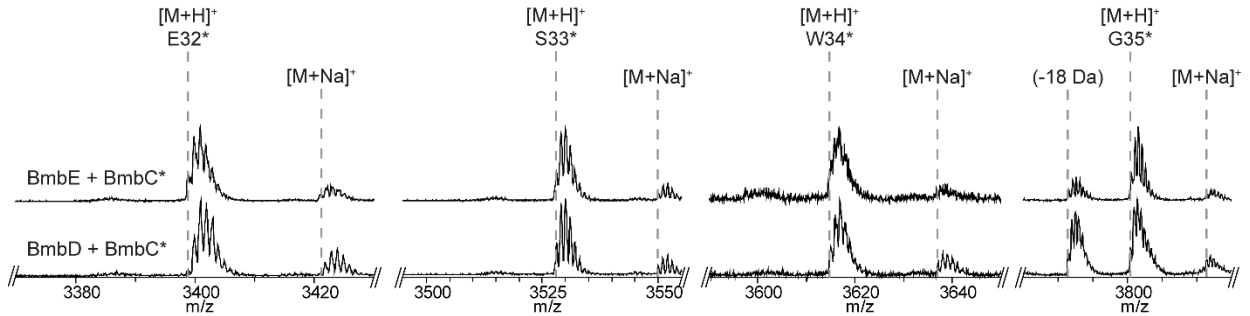

**Figure S11: Follower peptide residues important for thiazoline and macrolactamidine formation.** Single alanine variants were made in the bottromycin follower peptide in regions similar to lanthipeptide and cyanobactin recognition sequences. Dehydration was monitored by MALDI-TOF-MS.

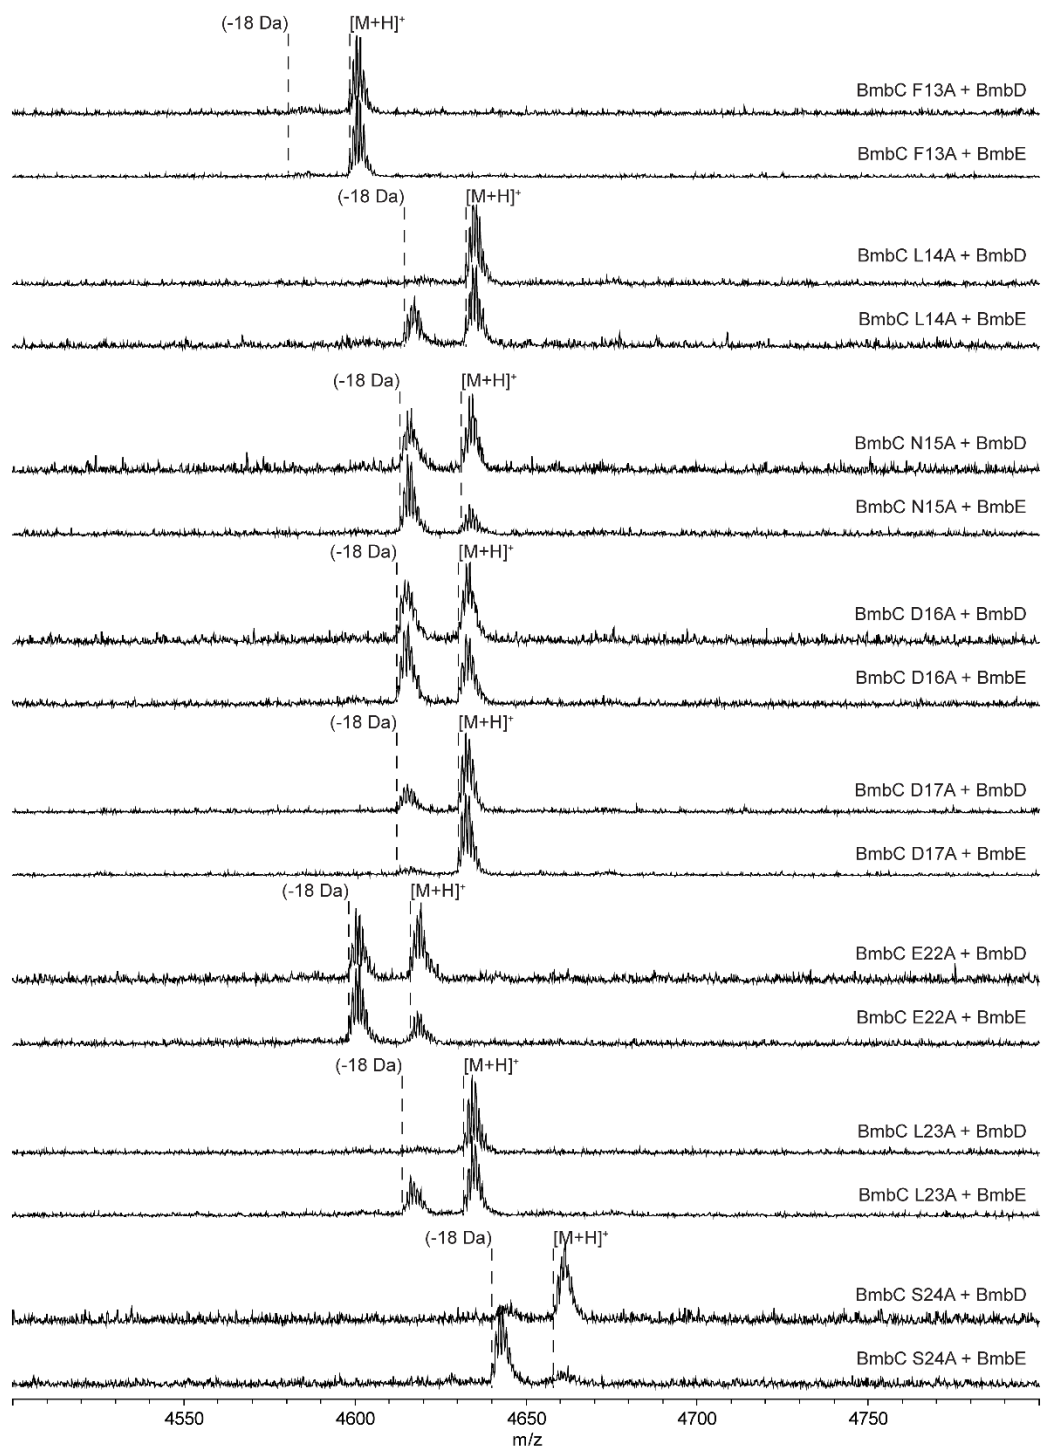

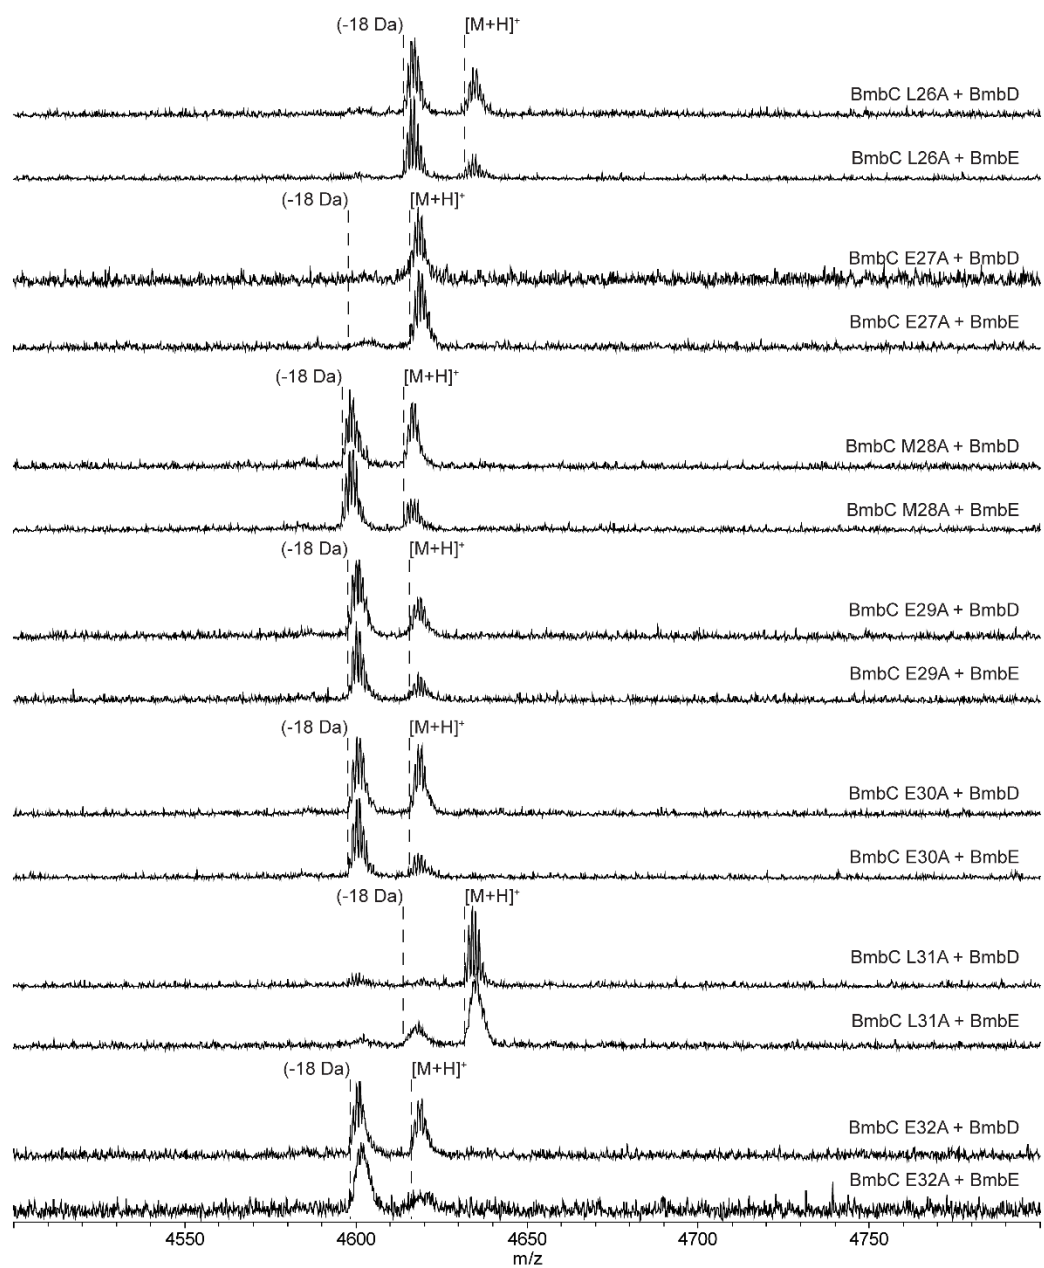



**Figure S12: Generation of a fluorescently-labeled bottromycin precursor peptide.** Expressed double mutant BmbC-C8S-S43C-His and labeled with 6-(iodoacetamido)fluorescein (IAF). MALDI-TOF-MS was used to assess reaction progress.

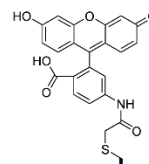

BmbC-C8S-S43C-His: **GPVVVFDS**MTADFLNDDPNNAELSALEMEELESWGAWDGEAT**CAAAL**EHHHHH

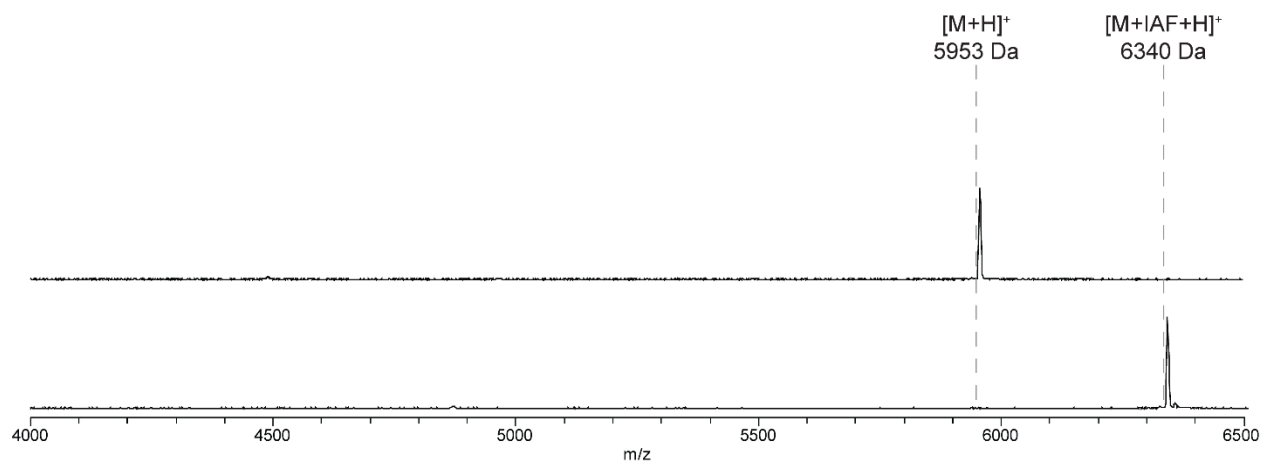

**Figure S13: Fluorescence polarization analysis of BmbC binding.** BmbD, BmbE and excised RiPP recognition element (RRE) domains from BmbB and BmbF were analyzed for binding affinity to BmbC. (A) Binding of fluorescently tagged BmbC to BmbD. (B) Binding of fluorescently-tagged BmbC to BmbE. (C) Binding of fluorescently tagged BmbC to BmbB (residues 492-593). (D) Binding of fluorescently-tagged BmbC to BmbF (residues 526-670). Error bars show s.e.m. from three independent trials.

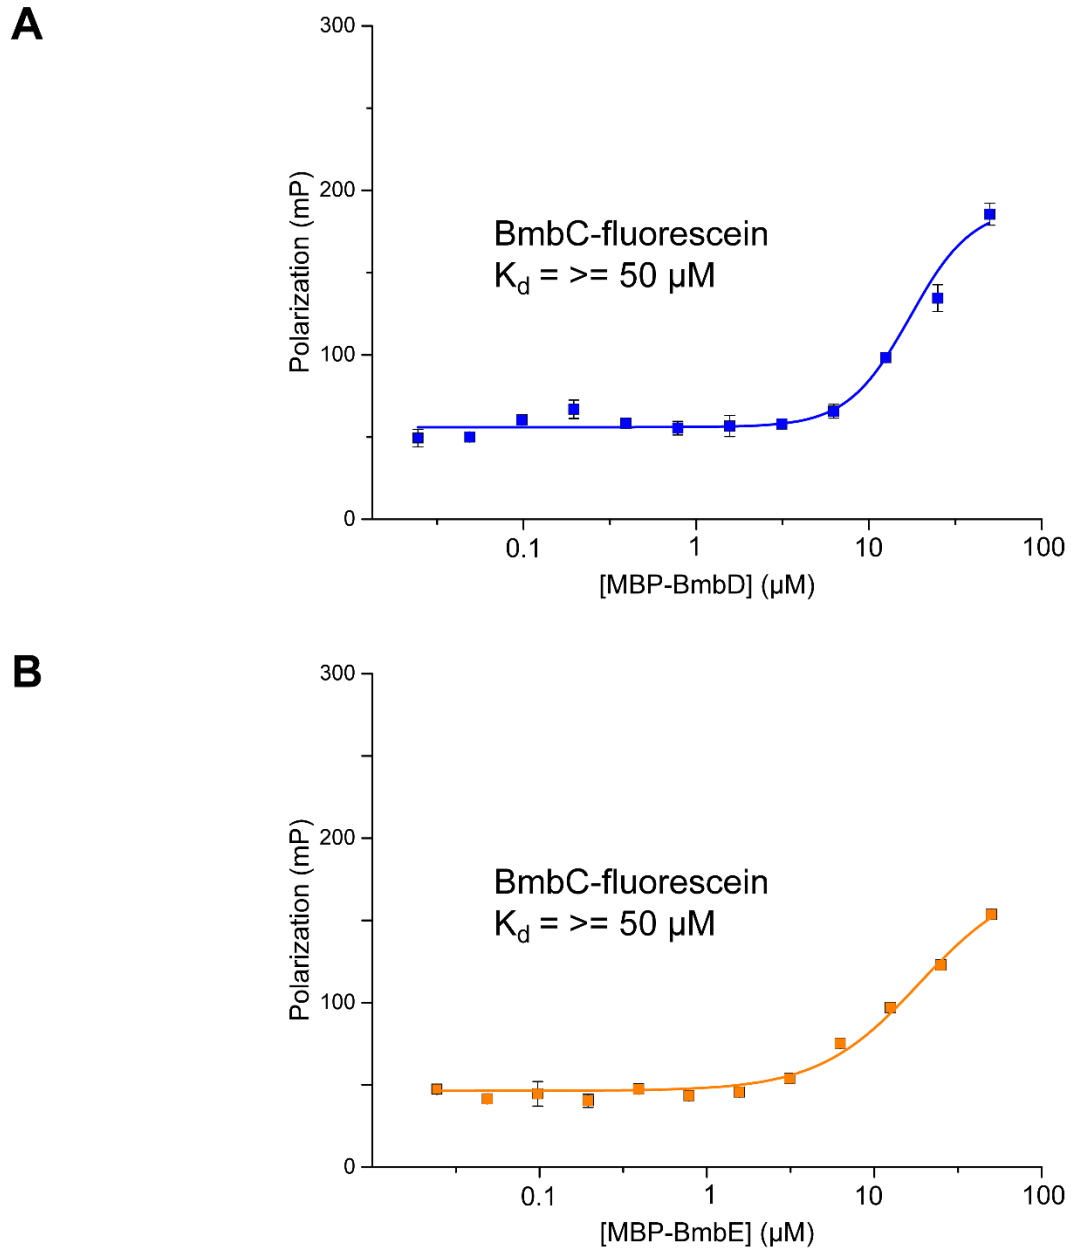

**C**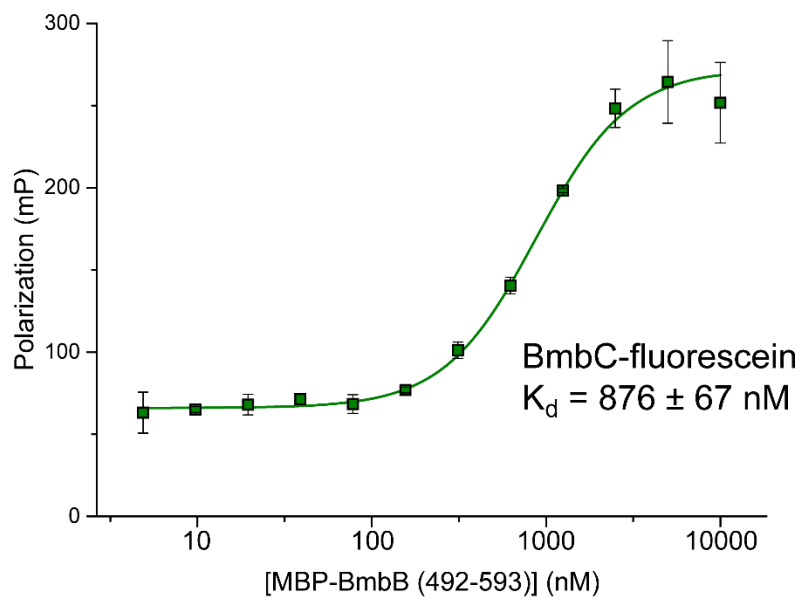**D**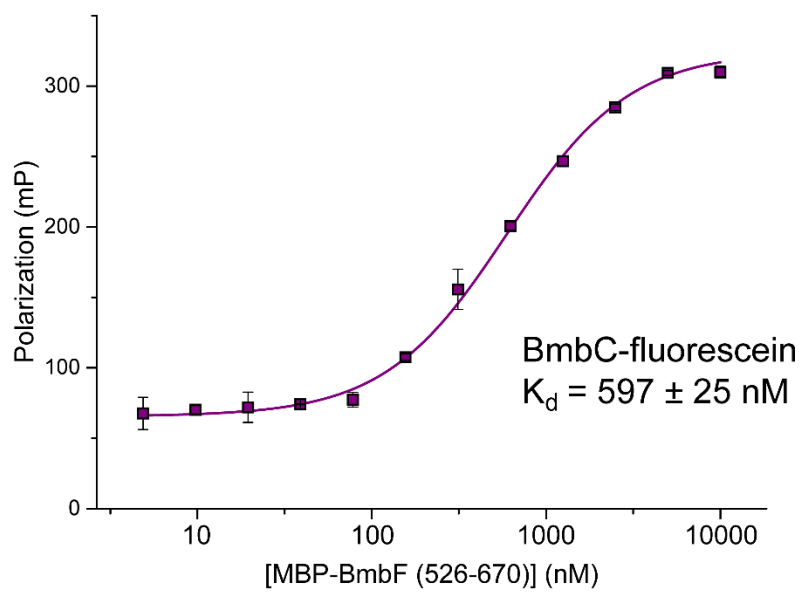

**Figure S14: RODEO prospecting of YcaO superfamily classes.** (A) Flow chart describing the classification methods used for grouping YcaOs based on contexts. Classifications were made to generate a conservative estimate of standalone YcaOs (*i.e.* any Ocin-ThiF-like protein would disqualify any YcaO in the cluster from qualifying as a “standalone”, E1-like domains are conflated with ThiF-like domains, dehydroalanine = “Dha” dehydrobutyryne = “Dhb”). (B) Distribution of YcaOs based on the classification presented in panel A.

**A**

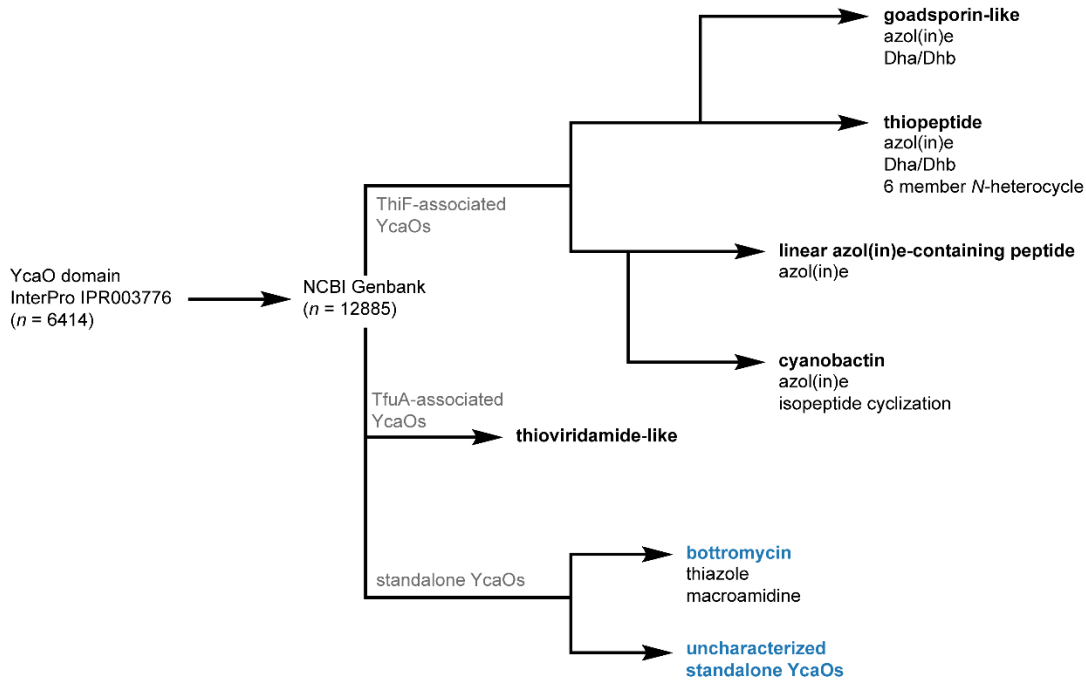

**B**

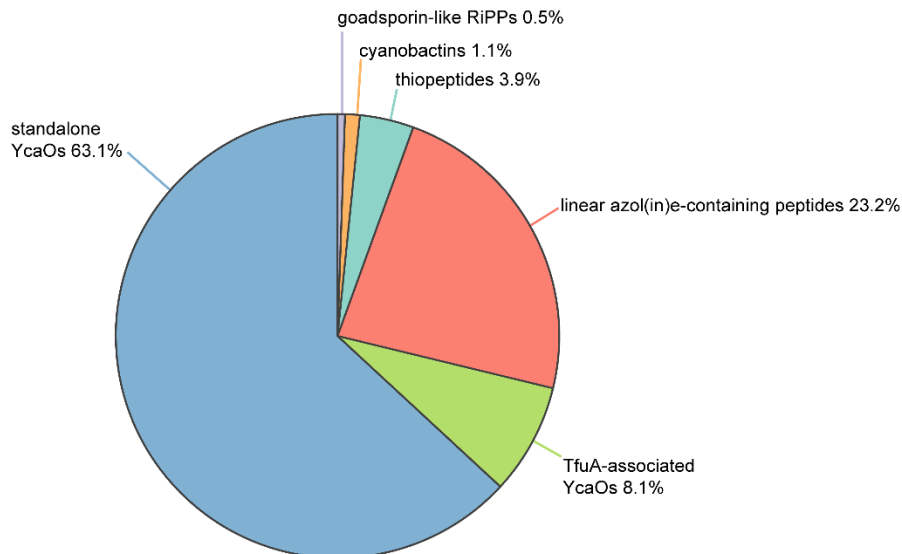

**Table S7: Co-Occurrence of genes with non-canonical YcaOs.** RODEO was used to inspect BGC contexts for genes co-occurring with YcaOs that lacked a nearby gene encoding for either an E1 ubiquitin-activating enzyme or ocin-ThiF-like protein. The top 100 protein families are shown, organized by frequency of occurrence. Genes predicted to be involved in transport are red, regulation are yellow, ATPase-like are green, putative RiPP biosynthetic genes are in blue and domains of unknown function (DUF) are in purple.

| <b>Pfam Title</b> | <b>Description</b>                                              | <b>Count</b> |
|-------------------|-----------------------------------------------------------------|--------------|
| YcaO              | YcaO-like family                                                | 13811        |
| ABC_tran          | ABC transporter                                                 | 10786        |
| AAA_21            | AAA domain putative AbiEii toxin Type IV TA system              | 6337         |
| MFS_1             | Major Facilitator Superfamily                                   | 6093         |
| SMC_N             | RecF/RecN/SMC N terminal domain                                 | 5990         |
| ABC_membrane      | ABC transporter transmembrane region                            | 5768         |
| Radical_SAM       | Radical SAM superfamily                                         | 4665         |
| Sugar_tr          | Sugar (and other) transporter                                   | 4407         |
| Aminotran_5       | Aminotransferase class-V                                        | 4286         |
| Fer4_12           | 4Fe-4S single cluster domain                                    | 3872         |
| AAA_17            | AAA domain                                                      | 3814         |
| S1                | S1 RNA binding domain                                           | 3753         |
| Lactamase_B       | Metallo-beta-lactamase superfamily                              | 3730         |
| Fer4_14           | 4Fe-4S single cluster domain                                    | 3692         |
| MFS_4             | Uncharacterised MFS-type transporter YbfB                       | 3648         |
| Form_Nir_trans    | Formate/nitrite transporter                                     | 3505         |
| Gly_radical       | Glycine radical                                                 | 3491         |
| EPSP_synthase     | EPSP synthase (3-phosphoshikimate 1-carboxyvinyltransferase)    | 3478         |
| NTP_transf_3      | MobA-like NTP transferase domain                                | 3442         |
| Pyr_redox_2       | Pyridine nucleotide-disulphide oxidoreductase                   | 3432         |
| DUF4131           | Domain of unknown function (DUF4131)                            | 3370         |
| HTH_1             | Bacterial regulatory helix-turn-helix protein lysR family       | 3273         |
| Bac_DNA_binding   | Bacterial DNA-binding protein                                   | 3269         |
| Cytidylate_kin    | Cytidylate kinase                                               | 3254         |
| PCB_OB            | Penicillin-binding protein OB-like domain                       | 3240         |
| DUF4496           | Domain of unknown function (DUF4496)                            | 3237         |
| Nitroreductase    | Nitroreductase family                                           | 3231         |
| APH               | Phosphotransferase enzyme family                                | 3213         |
| S1_2              | S1 domain                                                       | 3210         |
| LysR_substrate    | LysR substrate binding domain                                   | 3182         |
| Cytidylate_kin2   | Cytidylate kinase-like family                                   | 3120         |
| LpxK              | Tetraacyldisaccharide-1-P 4'-kinase                             | 3104         |
| CTP_transf_3      | Cytidylyltransferase                                            | 3102         |
| Trm112p           | Trm112p-like protein                                            | 3074         |
| Competence        | Competence protein                                              | 3034         |
| AAA               | ATPase family associated with various cellular activities (AAA) | 3016         |
| DUF421            | Protein of unknown function (DUF421)                            | 2925         |
| DUF2064           | Uncharacterized protein conserved in bacteria (DUF2064)         | 2898         |
| MobB              | Molybdopterin guanine dinucleotide synthesis protein B          | 2872         |
| tRNA-synt_2b      | tRNA synthetase class II core domain (G H P S and T)            | 2856         |
| Keratin_assoc     | Keratinocyte-associated protein 2                               | 2852         |
| HTH_42            | Winged helix DNA-binding domain                                 | 2823         |
| HTH_24            | Winged helix-turn-helix DNA-binding                             | 2820         |
| HU-DNA_bdg        | DNA-binding domain                                              | 2800         |
| DUF218            | DUF218 domain                                                   | 2783         |
| Methyltransf_11   | Methyltransferase domain                                        | 2757         |
| Methyltransf_31   | Methyltransferase domain                                        | 2736         |
| DUF2318           | Predicted membrane protein (DUF2318)                            | 2639         |
| Acetyltransf_1    | Acetyltransferase (GNAT) family                                 | 2601         |
| DmsC              | DMSO reductase anchor subunit (DmsC)                            | 2581         |

|                  |                                                                     |      |
|------------------|---------------------------------------------------------------------|------|
| Seryl_tRNA_N     | Seryl-tRNA synthetase N-terminal domain                             | 2563 |
| Fer4             | 4Fe-4S binding domain                                               | 2557 |
| Abhydrolase_5    | Alpha/beta hydrolase family                                         | 2525 |
| AAA_assoc_2      | AAA C-terminal domain                                               | 2521 |
| MgsA_C           | MgsA AAA+ ATPase C terminal                                         | 2520 |
| LolA             | Outer membrane lipoprotein carrier protein LolA                     | 2486 |
| Molybdop_binding | Molybdopterin dinucleotide binding domain                           | 2417 |
| DUF2092          | Predicted periplasmic protein (DUF2092)                             | 2411 |
| Molybdopterin    | Molybdopterin oxidoreductase                                        | 2395 |
| FtsK_SpoIIIE     | FtsK/SpoIIIE family                                                 | 2383 |
| Response_reg     | Response regulator receiver domain                                  | 2347 |
| AAA_26           | AAA domain                                                          | 2344 |
| Ftsk_gamma       | Ftsk gamma domain                                                   | 2321 |
| Fer4_11          | 4Fe-4S dicluster domain                                             | 2315 |
| Molybdop_Fe4S4   | Molybdopterin oxidoreductase Fe4S4 domain                           | 2288 |
| Pyr_redox        | Pyridine nucleotide-disulphide oxidoreductase                       | 2217 |
| Fer4_2           | 4Fe-4S binding domain                                               | 2194 |
| Filament         | Intermediate filament protein                                       | 2143 |
| Peptidase_M48    | Peptidase family M48                                                | 2131 |
| A2L_zn_ribbon    | A2L zinc ribbon domain                                              | 2121 |
| HATPase_c        | Histidine kinase- DNA gyrase B- and HSP90-like ATPase               | 2120 |
| FtsK_4TM         | 4TM region of DNA translocase FtsK/SpoIIIE                          | 2114 |
| HTH_AsnC-type    | AsnC-type helix-turn-helix domain                                   | 2023 |
| adh_short        | short chain dehydrogenase                                           | 1951 |
| AsnC_trans_reg   | AsnC family                                                         | 1942 |
| Acetyltransf_7   | Acetyltransferase (GNAT) domain                                     | 1929 |
| XK-related       | XK-related protein                                                  | 1916 |
| HTH_3            | Helix-turn-helix                                                    | 1911 |
| MarR_2           | MarR family                                                         | 1903 |
| AA_permease_2    | Amino acid permease                                                 | 1886 |
| BPD_transp_1     | Binding-protein-dependent transport system inner membrane component | 1876 |
| adh_short_C2     | Enoyl-(Acyl carrier protein) reductase                              | 1866 |
| ABC2_membrane_3  | ABC-2 family transporter protein                                    | 1856 |
| AAA_16           | AAA ATPase domain                                                   | 1847 |
| AA_permease      | Amino acid permease                                                 | 1839 |
| Pyr_redox_3      | Pyridine nucleotide-disulphide oxidoreductase                       | 1829 |
| Methyltransf_23  | Methyltransferase domain                                            | 1826 |
| DUF4345          | Domain of unknown function (DUF4345)                                | 1817 |
| Acetyltransf_10  | Acetyltransferase (GNAT) domain                                     | 1797 |
| OsmC             | OsmC-like protein                                                   | 1761 |
| HTH_19           | Helix-turn-helix domain                                             | 1754 |
| HTH_31           | Helix-turn-helix domain                                             | 1719 |
| KR               | KR domain                                                           | 1713 |
| Isochorismatase  | Isochorismatase family                                              | 1644 |
| ABC2_membrane    | ABC-2 type transporter                                              | 1594 |
| Sigma70_r4_2     | Sigma-70 region 4                                                   | 1568 |
| TetR_N           | Bacterial regulatory proteins tetR family                           | 1460 |
| HTH_18           | Helix-turn-helix domain                                             | 1443 |
| HTH_AraC         | Bacterial regulatory helix-turn-helix proteins AraC family          | 1395 |
| Tfua             | Tfua-like protein                                                   | 1350 |

**Figure S15: Sequence similarity network (SSN) of non-canonical YcaOs.** The Enzyme Function Initiative Enzyme Similarity Tool (EFI-EST) was used to generate a SSN for YcaOs belonging to BGCs that did not contain an E1 ubiquitin-activating like protein (previously denoted “C” protein) or an ocin-ThiF-like protein (previously denoted “F” protein), sequences obtained from RODEO were analyzed with a cutoff e-value of  $10^{-50}$  and members with >85% identity were conflated to a single node.<sup>6-8</sup> Visualization of the SSN was performed with Cytoscape 3.0.<sup>9</sup>

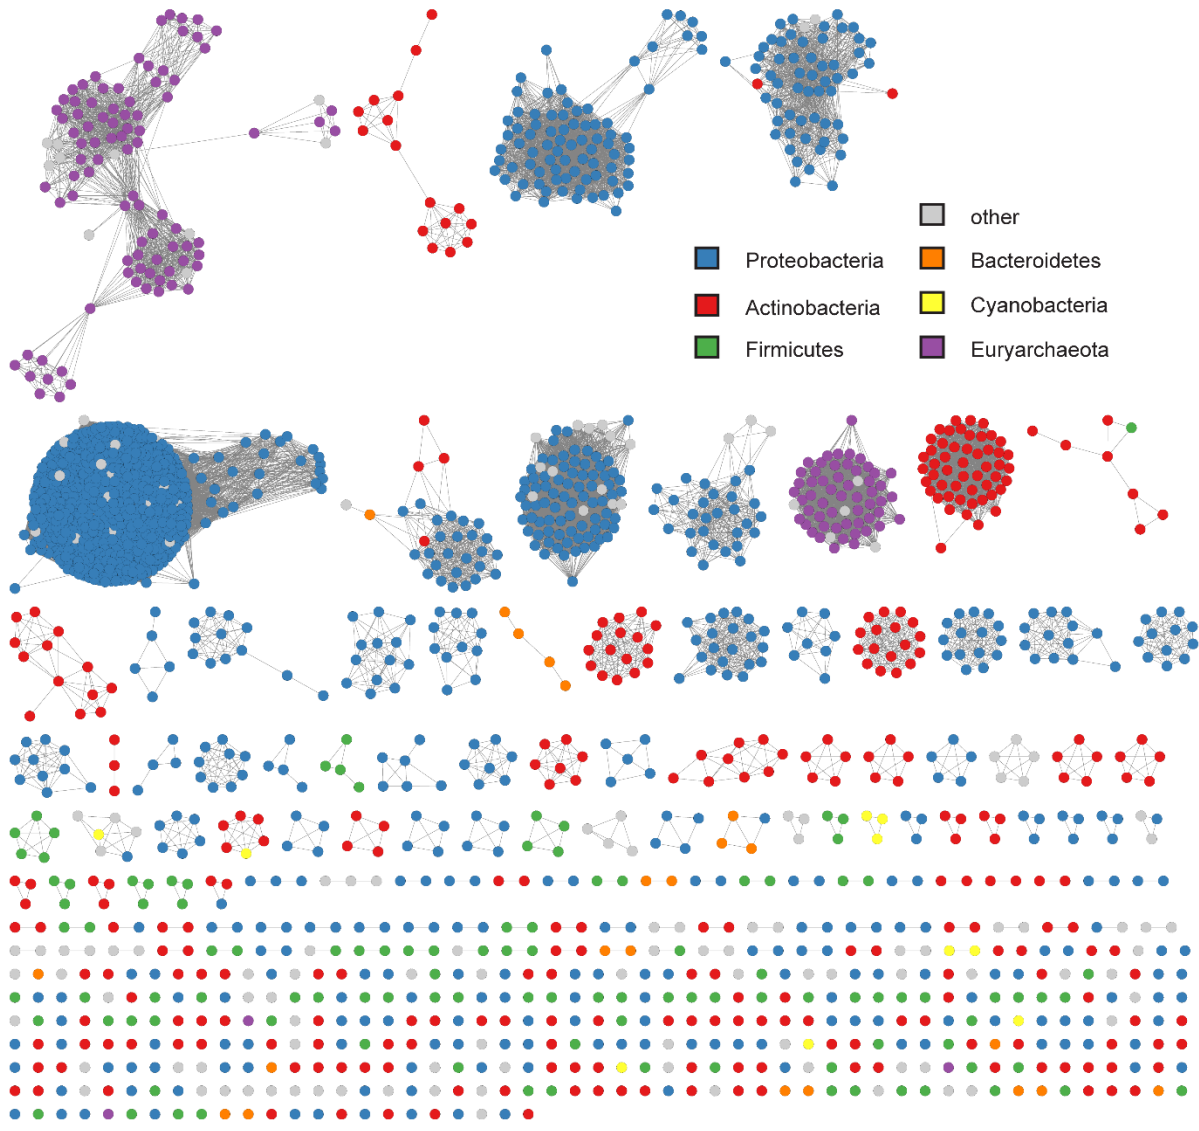

**Figure S16: SSN of non-canonical YcaOs related to bottromycin BmbD.** The SSN from **Figure S15** recolored to represent similarity to BmbD assessed by HMMER 3.1b1 hmmscan utility against a profile hidden Markov model (pHMM) of bioinformatically-identifiable BmbD sequences.<sup>10</sup> Scores were binned into three groups and mapped to the SSN. The bottromycin BmbD cluster is boxed.

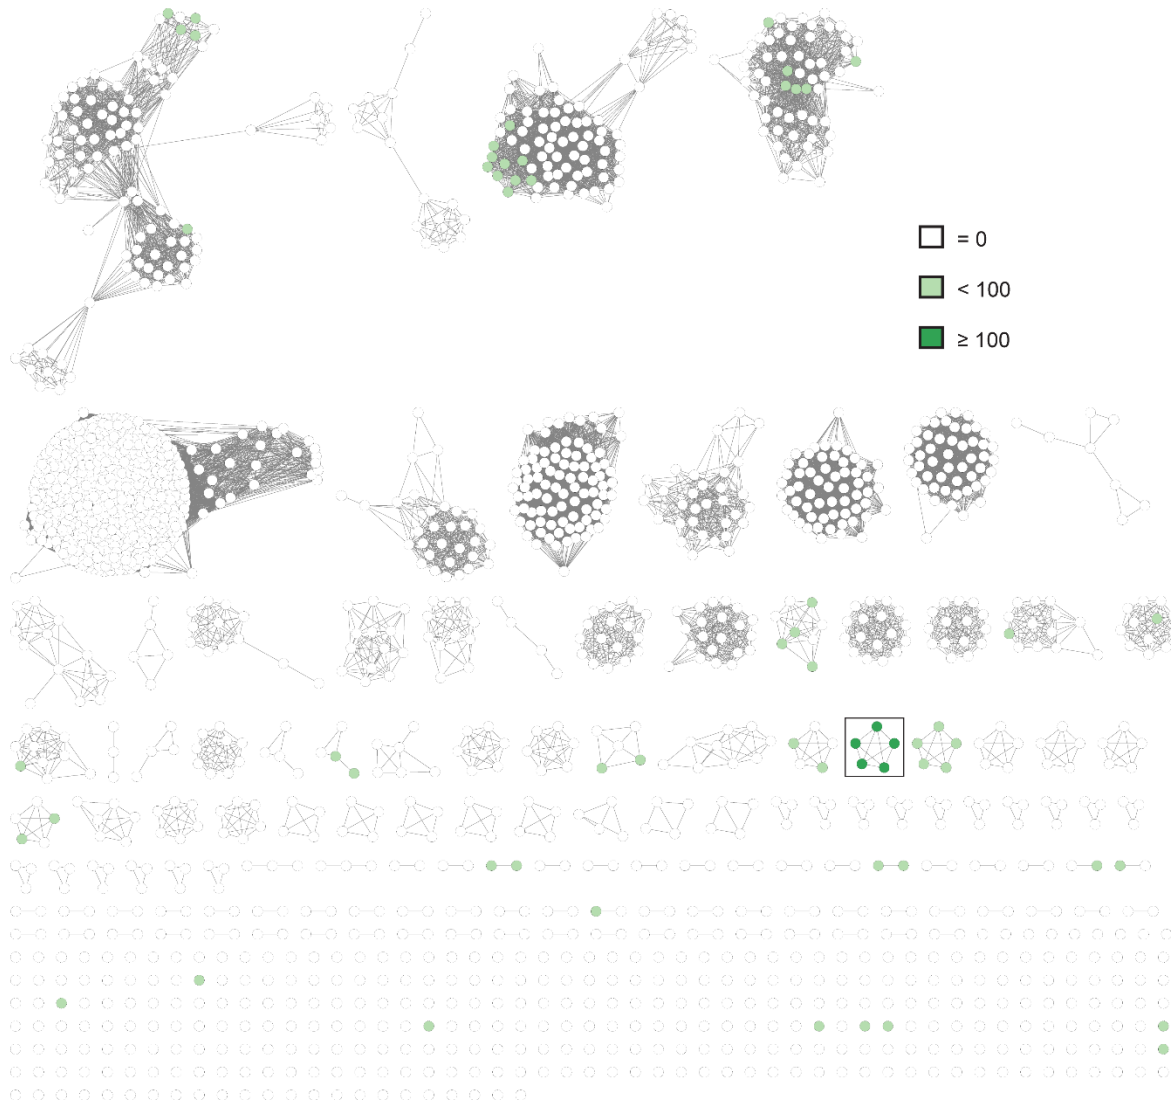



**Figure S17: SSN of non-canonical YcaOs related to bottromycin BmbE.** The SSN from **Figure S15** recolored to represent similarity to BmbE assessed by HMMER 3.1b1 hmmscan utility against a profile hidden Markov model (pHMM) of bioinformatically-identifiable BmbE sequences.<sup>10</sup> Scores were binned into three groups and mapped to the SSN. The bottromycin BmbE cluster is boxed.

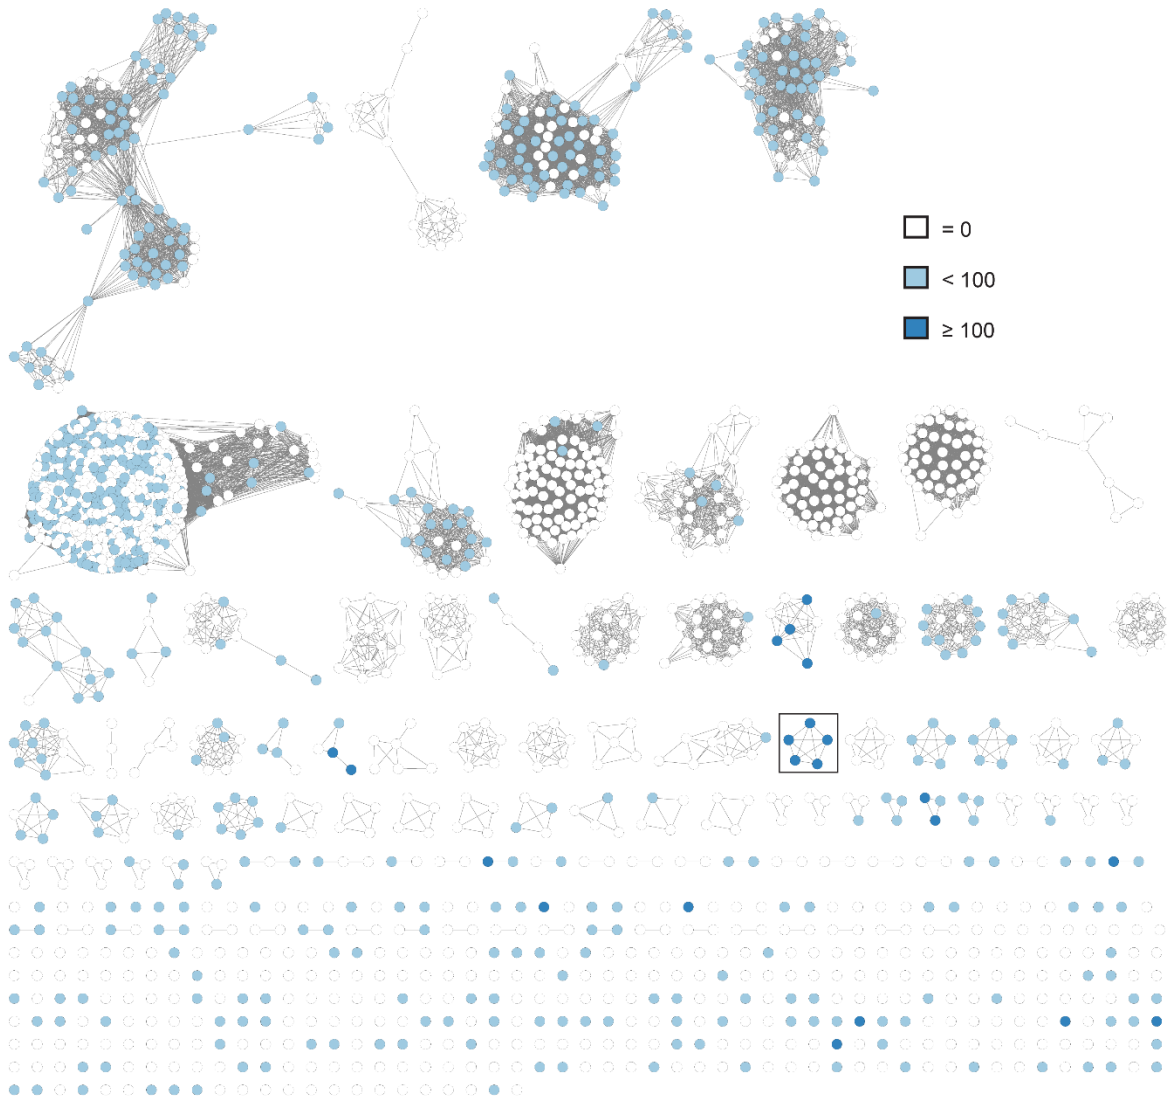

**Figure S18: Phylogenetic tree of YcaO subfamilies with representative BGCs. (next page)** Unrooted maximum likelihood phylogeny of representative YcaO sequences chosen to represent a diversity of YcaO sequence space and BGC contexts. Representative BGCs likely associated with RiPPs are shown as callouts. Alignments were made using MAFFT v7.222 using the G-INS-I strategy. The phylogenetic tree was created using FastTree v2.1.10 and visualized with iTOL v3 (<http://itol.embl.de/>).<sup>11,12</sup>



## Supplemental References

**Full citation for reference 1:** Arnison, P. G.; Bibb, M. J.; Bierbaum, G.; Bowers, A. A.; Bugni, T. S.; Bulaj, G.; Camarero, J. A.; Campopiano, D. J.; Challis, G. L.; Clardy, J.; Cotter, P. D.; Craik, D. J.; Dawson, M.; Dittmann, E.; Donadio, S.; Dorrestein, P. C.; Entian, K.-D.; Fischbach, M. A.; Garavelli, J. S.; Goeransson, U.; Gruber, C. W.; Haft, D. H.; Hemscheidt, T. K.; Hertweck, C.; Hill, C.; Horswill, A. R.; Jaspars, M.; Kelly, W. L.; Klinman, J. P.; Kuipers, O. P.; Link, A. J.; Liu, W.; Marahiel, M. A.; Mitchell, D. A.; Moll, G. N.; Moore, B. S.; Mueller, R.; Nair, S. K.; Nes, I. F.; Norris, G. E.; Olivera, B. M.; Onaka, H.; Patchett, M. L.; Piel, J.; Reaney, M. J. T.; Rebuffat, S.; Ross, R. P.; Sahl, H.-G.; Schmidt, E. W.; Selsted, M. E.; Severinov, K.; Shen, B.; Sivonen, K.; Smith, L.; Stein, T.; Suessmuth, R. D.; Tagg, J. R.; Tang, G.-L.; Truman, A. W.; Vederas, J. C.; Walsh, C. T.; Walton, J. D.; Wenzel, S. C.; Willey, J. M.; van der Donk, W. A. *Nat. Prod. Rep.* **2013**, 30, 108.

- (1) Krusemark, C. J.; Frey, B. L.; Smith, L. M.; Belshaw, P. J. In *Gel-Free Proteomics: Methods and Protocols*; Gevaert, K., Vandekerckhove, J., Eds.; Humana Press: Totowa, NJ, 2011, p 77.
- (2) Řehulková, H.; Marchetti-Deschmann, M.; Pittenauer, E.; Allmaier, G.; Řehulka, P. *Journal of Mass Spectrometry* **2009**, 44, 1613.
- (3) Fogh, R.; Ionides, J.; Ulrich, E.; Boucher, W.; Vranken, W.; Linge, J. P.; Habeck, M.; Rieping, W.; Bhat, T. N.; Westbrook, J.; Henrick, K.; Gilliland, G.; Berman, H.; Thornton, J.; Nilges, M.; Markley, J.; Laue, E. *Nat. Struct. Mol. Biol.* **2002**, 9, 416.
- (4) Campanella, J. J.; Bitincka, L.; Smalley, J. *BMC Bioinformatics* **2003**, 4, 29.
- (5) Dunbar, K. L.; Chekan, J. R.; Cox, C. L.; Burkhardt, B. J.; Nair, S. K.; Mitchell, D. A. *Nat. Chem. Biol.* **2014**, 10, 823.
- (6) Gerlt, J. A. *Biochemistry* **2017**, 56, 4293.
- (7) Gerlt, J. A.; Bouvier, J. T.; Davidson, D. B.; Imker, H. J.; Sadkhin, B.; Slater, D. R.; Whalen, K. L. *Biochimica et biophysica acta* **2015**, 1854, 1019.
- (8) Tietz, J. I.; Schwalen, C. J.; Patel, P. S.; Maxson, T.; Blair, P. M.; Tai, H.-C.; Zakai, U. I.; Mitchell, D. A. *Nat Chem Biol* **2017**, 13, 470.
- (9) Shannon, P.; Markiel, A.; Ozier, O.; Baliga, N. S.; Wang, J. T.; Ramage, D.; Amin, N.; Schwikowski, B.; Ideker, T. *Genome research* **2003**, 13, 2498.
- (10) Finn, R. D.; Clements, J.; Arndt, W.; Miller, B. L.; Wheeler, T. J.; Schreiber, F.; Bateman, A.; Eddy, S. R. *Nucleic acids research* **2015**, 43, W30.
- (11) Katoh, K.; Standley, D. M. *Molecular Biology and Evolution* **2013**, 30, 772.
- (12) Price, M. N.; Dehal, P. S.; Arkin, A. P. *PLOS ONE* **2010**, 5, e9490.
